# Supplementary material
Source: PubMed Central journal article supplement (PMC2634855)
Supplement: NIHMS86543-supplement-3_si_003.pdf [file NIHMS86543-supplement-3_si_003.pdf]

```

Current Data Parameters
=====
USER          ht-f11-1
NAME          ht-f11-1
EXPNO        1
PROCNO       1

F2 - Acquisition Parameters
=====
Date_         20060425
Time_        12.44
INSTRUM      gms500
PROBHD       5 mm broadband
PULPROG      zg30
TD            8128
SOLVENT      CDCl3
DS            0
NS            2
SFO1         8012.820 Hz
SF           0.098943 Hz
AQ           5.0398774 sec
RG           645.1
DW           62.400 usec
DE           6.00 usec
TE           298.0 K
D1           0.1000000 sec
INCRST       0.0000000 sec
PCPRK        0.0150000 sec

===== CHANNEL f1 =====
NUC1          13
P1            11.50 usec
PL1           -3.00 dB
SFO1         499.9334895 MHz

F2 - Processing parameters
=====
SI            65536
SF           499.9302023 MHz
WDW          EM
SSB          0
LB           0.30 Hz
GB           0
PC           4.00

ID_NMR plot parameters
=====
CT           22.80 cm
CI           15.00 cm
F1           8.000 ppm
F2           3999.44 Hz
F3           -1.000 ppm
F4           -699.93 Hz
PRNOM       0.39474 ppm/cm
HZCM        197.34081 Hz/cm

```

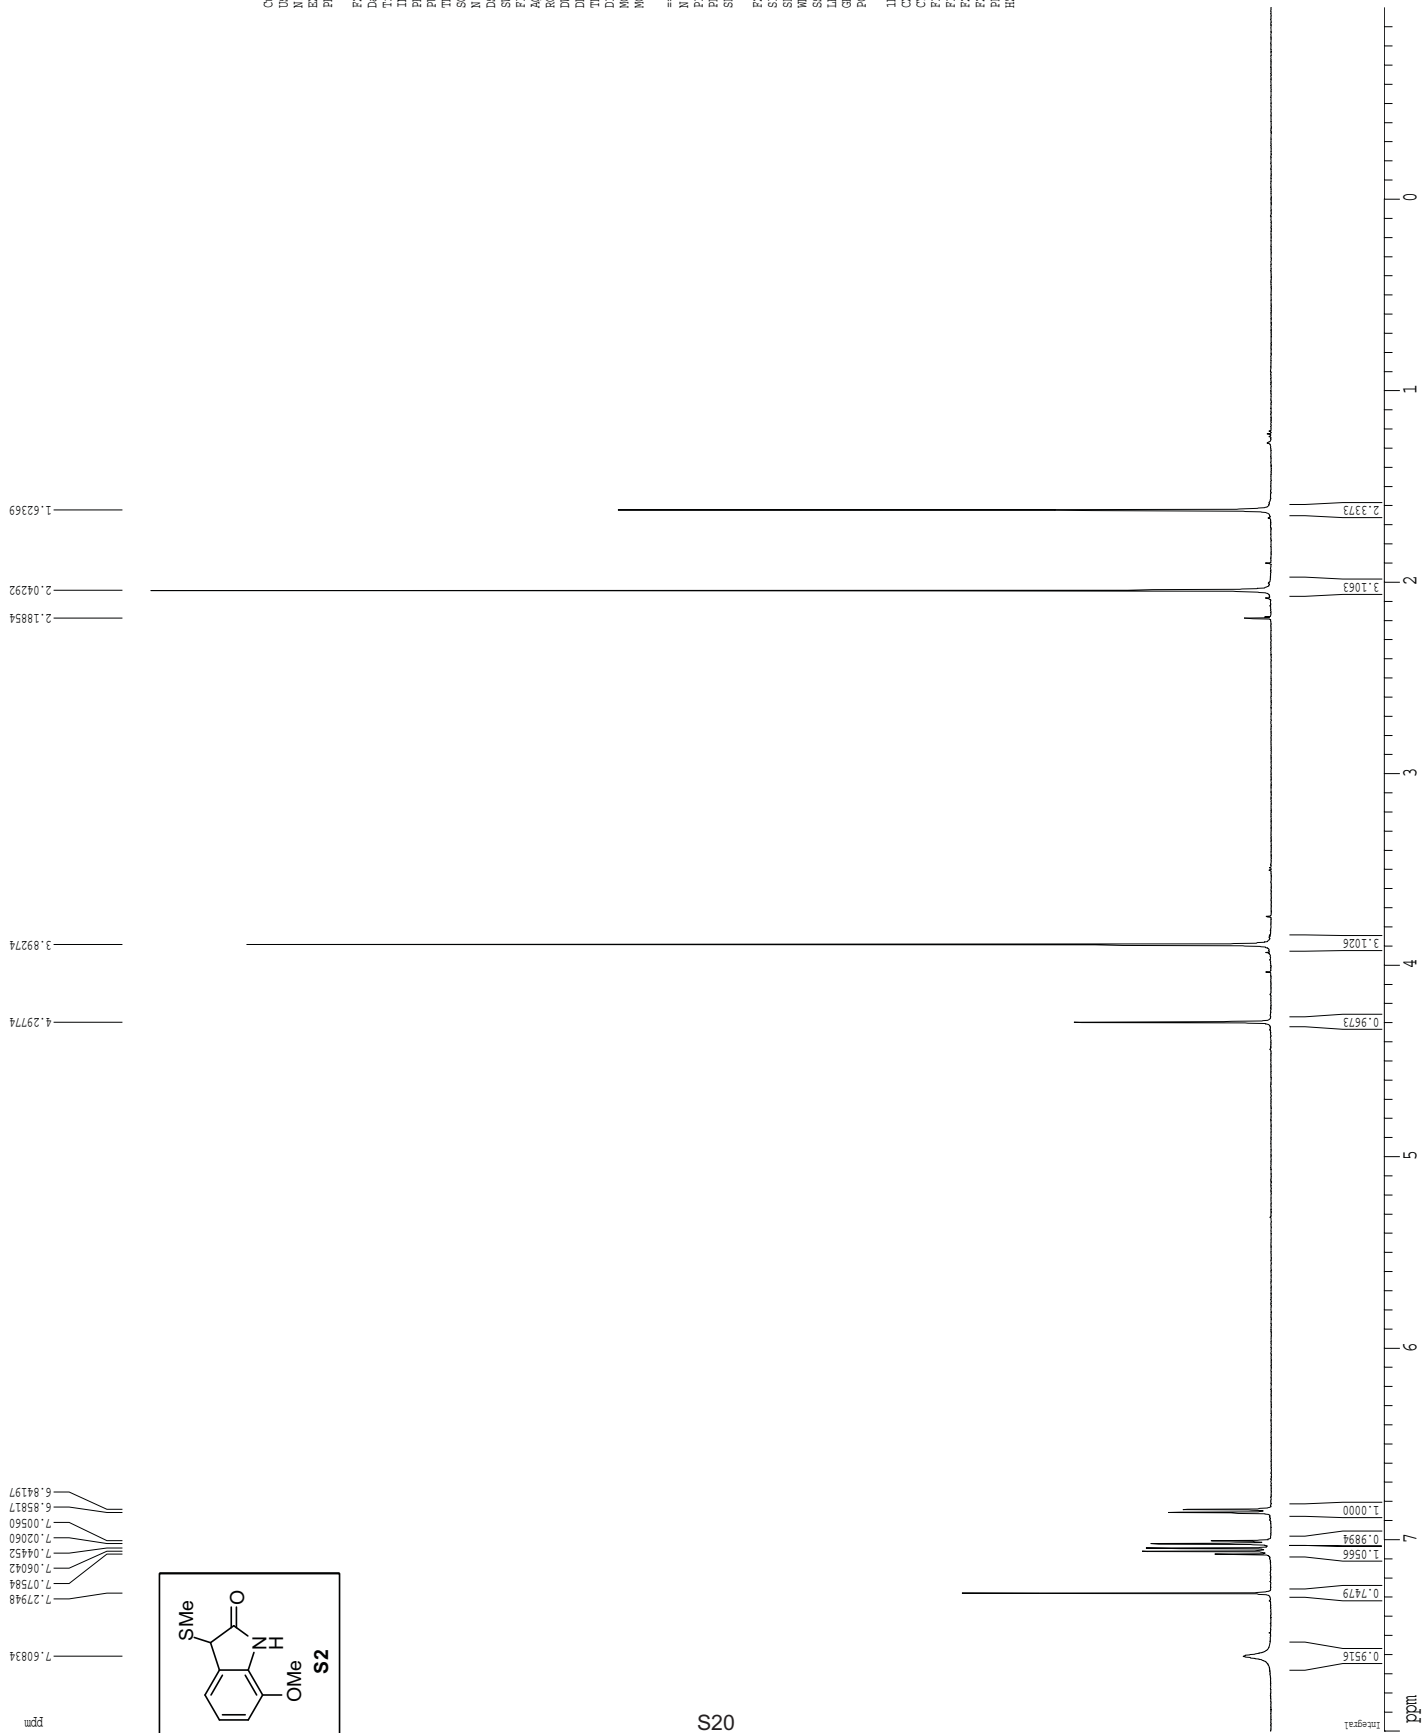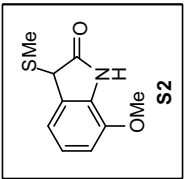

7.60834  
7.27948  
7.07584  
7.06042  
7.04452  
7.02060  
7.00560  
6.85817  
6.84197

1H spectrum

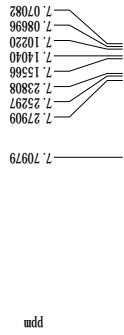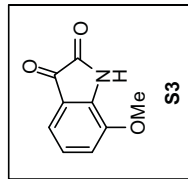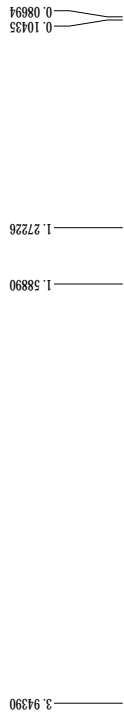

Current Data Parameters  
 USER: ht-1-2-2  
 EXPNO: 1  
 PROCNO: 1

F2 - Acquisition Parameters  
 Date\_: 20090909  
 Time: 18:07  
 INSTRUM: spect  
 PULPROG: zgpg30  
 FIDRES: 5 mm broadband  
 AQ: 5.098974 sec  
 RG: 812.7  
 TD: 65536  
 SOLVENT: CDCl3  
 NS: 16  
 DS: 2  
 SWH: 8012.820 Hz  
 FIDRES: 0.098043 Hz  
 AQ: 5.098974 sec  
 RG: 812.7  
 DW: 62.400 usec  
 DE: 6.00 usec  
 TE: 298.0 K  
 P1: 0.1000000 sec  
 PRST: 0.1000000 sec  
 MCHWA: 0.0150000 sec

==== CHANNEL f1 =====  
 NU1: 1H  
 P1: 11.50 usec  
 PL1: -3.00 dB  
 SF01: 498.9334895 MHz

F2 - Processing parameters  
 SI: 65536  
 SF: 498.9300203 MHz  
 AMW: EM  
 ASB: 0 Hz  
 GB: 0  
 PC: 4.00

ID MR plot parameters  
 CX: 22.80 cm  
 CY: 15.00 cm  
 FIP: 8.883 ppm  
 FI: 4342.11 Hz  
 F2P: -1.000 ppm  
 F2: -498.933 Hz  
 PPMCM: 0.42880 ppm/cm  
 HZCM: 212.37007 Hz/cm

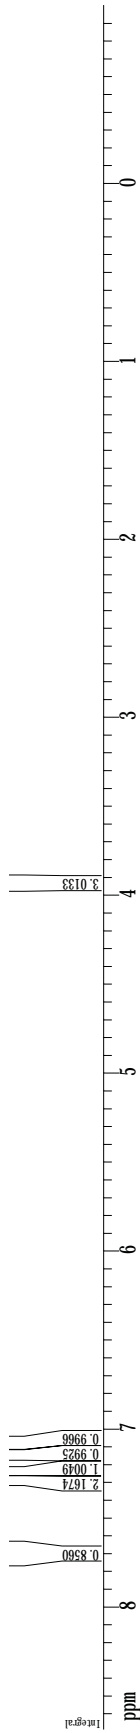

1H spectrum

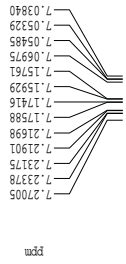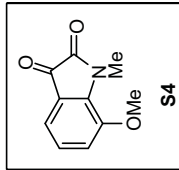

S22

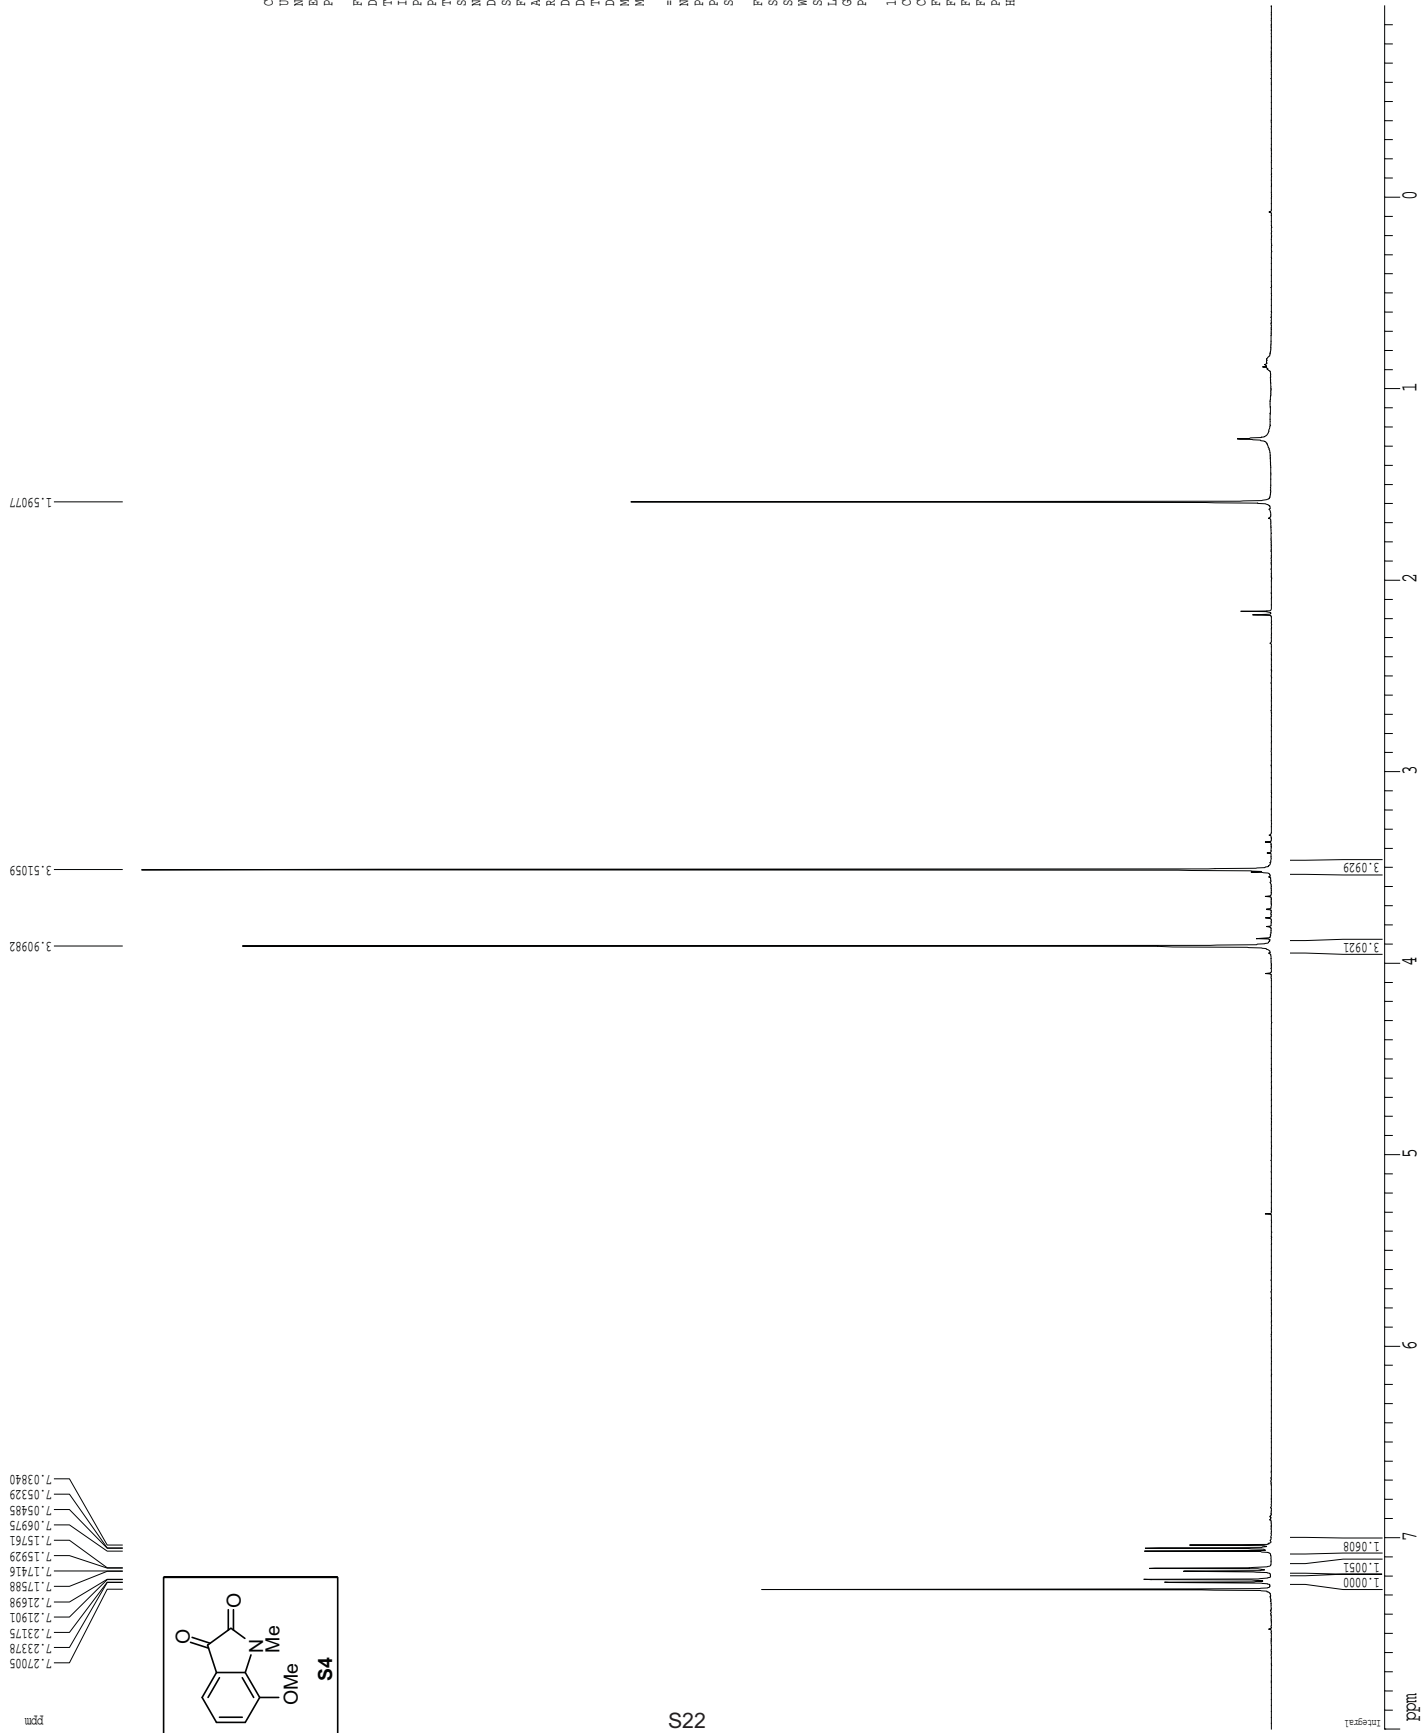

Current Data Parameters  
 USER: ranner  
 NAME: hr-1-133-1  
 EXPMO: 1  
 PROCNO: 1

F2 - Acquisition Parameters  
 Date\_: 20070110  
 Time: 8:53  
 INSTRUM: cryo500  
 PROBHD: 5 mm CPXI JH-  
 PULPROG: zgpg30  
 TO: 81.28  
 SOLVENT: CDCl3  
 NS: 8  
 DS: 2  
 SWH: 8012.820 Hz  
 FIDRES: 0.098843 Hz  
 AQ: 5.0989774 sec  
 RG: 5.7  
 DW: 62.400 usec  
 DE: 6.00 usec  
 TE: 298.0 K  
 D1: 0.1000000 sec  
 ACQRES1: 0.0000000 sec  
 ACQRES2: 0.0150000 sec

===== CHANNEL f1 =====  
 NUC1: 1H  
 P1: 8.00 usec  
 PL1: 1.60 dB  
 SFO1: 500.2235015 MHz

F2 - Processing parameters  
 SI: 65536  
 SF: 500.220266 MHz  
 WDW: EM  
 SSB: 0  
 AB: 0  
 GB: 0  
 PC: 4.00

ID NMR plot parameters  
 CX: 22.80 cm  
 CY: 15.00 cm  
 F1P: 8.000 ppm  
 F1: 4001.76 Hz  
 F2P: -1.000 ppm  
 F2: -500.22 Hz  
 PPM0M: 0.39474 ppm/cm  
 HZ0M: 197.45528 Hz/cm

1H spectrum

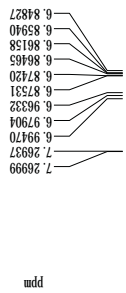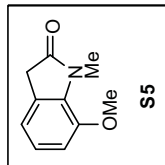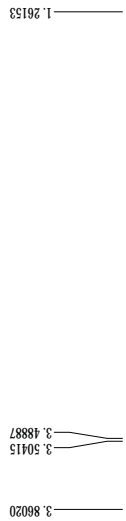

Current Data Parameters  
 USER: ranner  
 NAME: ht-128-1  
 EXPNO: 1  
 PROCNO: 1

F2 - Acquisition Parameters  
 Date\_: 20061214  
 Time: 10:24  
 INSTRUM: cryo500  
 PULPROG: zgpg30  
 HARDPROG: 5 mm CPTCL H-1  
 TD: 65536  
 SFO1: 500.136261 MHz  
 SOLVENT: CDCl3  
 NS: 8  
 DS: 2  
 SWH: 8012.820 Hz  
 FIDRES: 0.098843 Hz  
 AQ: 5.0989774 sec  
 RG: 5  
 DW: 62.400 usec  
 DE: 6.00 usec  
 TE: 298.0 K  
 AFT2: 0.1000000 sec  
 SFO2: 500.136261 MHz  
 ACQST: 0.0000000 sec  
 MCHKA: 0.0150000 sec

==== CHANNEL f1 =====  
 NUC1: 1H  
 P1: 8.00 usec  
 PL1: 1.60 dB  
 SFO1: 500.2235015 MHz

F2 - Processing parameters  
 SI: 65536  
 SF: 500.220267 MHz  
 MDW: EM  
 SB: 0 Hz  
 GB: 0  
 PC: 4.00

ID MR plot parameters  
 CX: 22.80 cm  
 CY: 10.00 cm  
 FIP: 8.000 ppm  
 FI: 4001.76 Hz  
 F2P: -1.000 ppm  
 F2: -500.22 Hz  
 PPMCM: 0.39874 ppm/cm  
 HZCM: 197.45328 Hz/cm

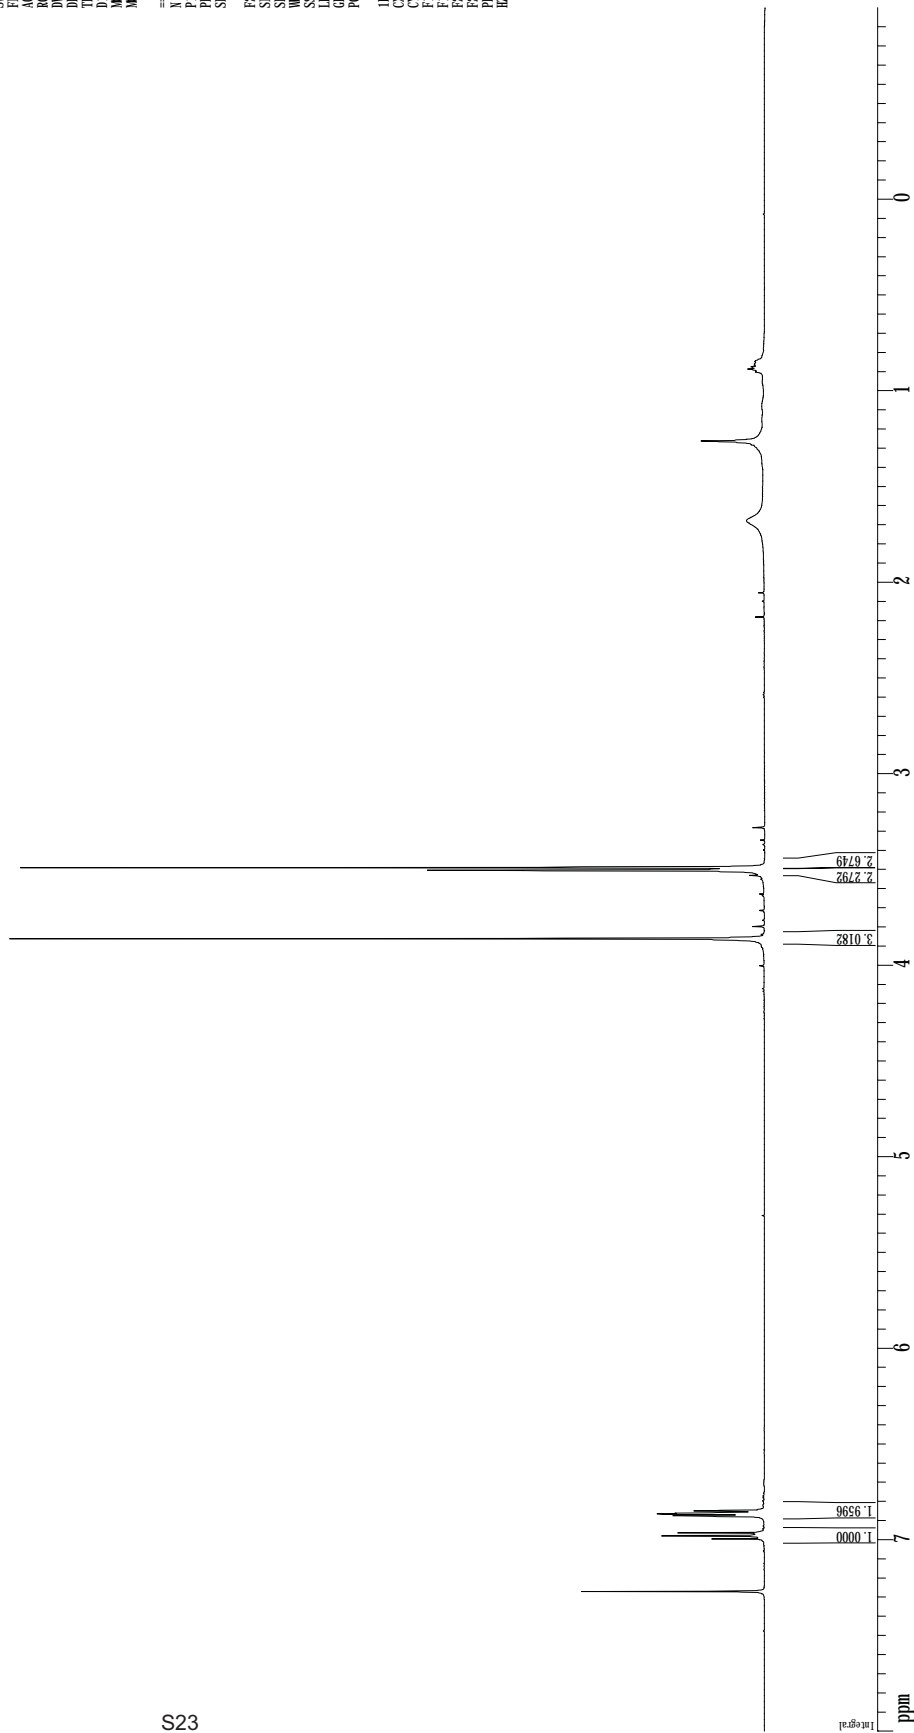

<sup>13</sup>C spectrum with <sup>1</sup>H decoupling

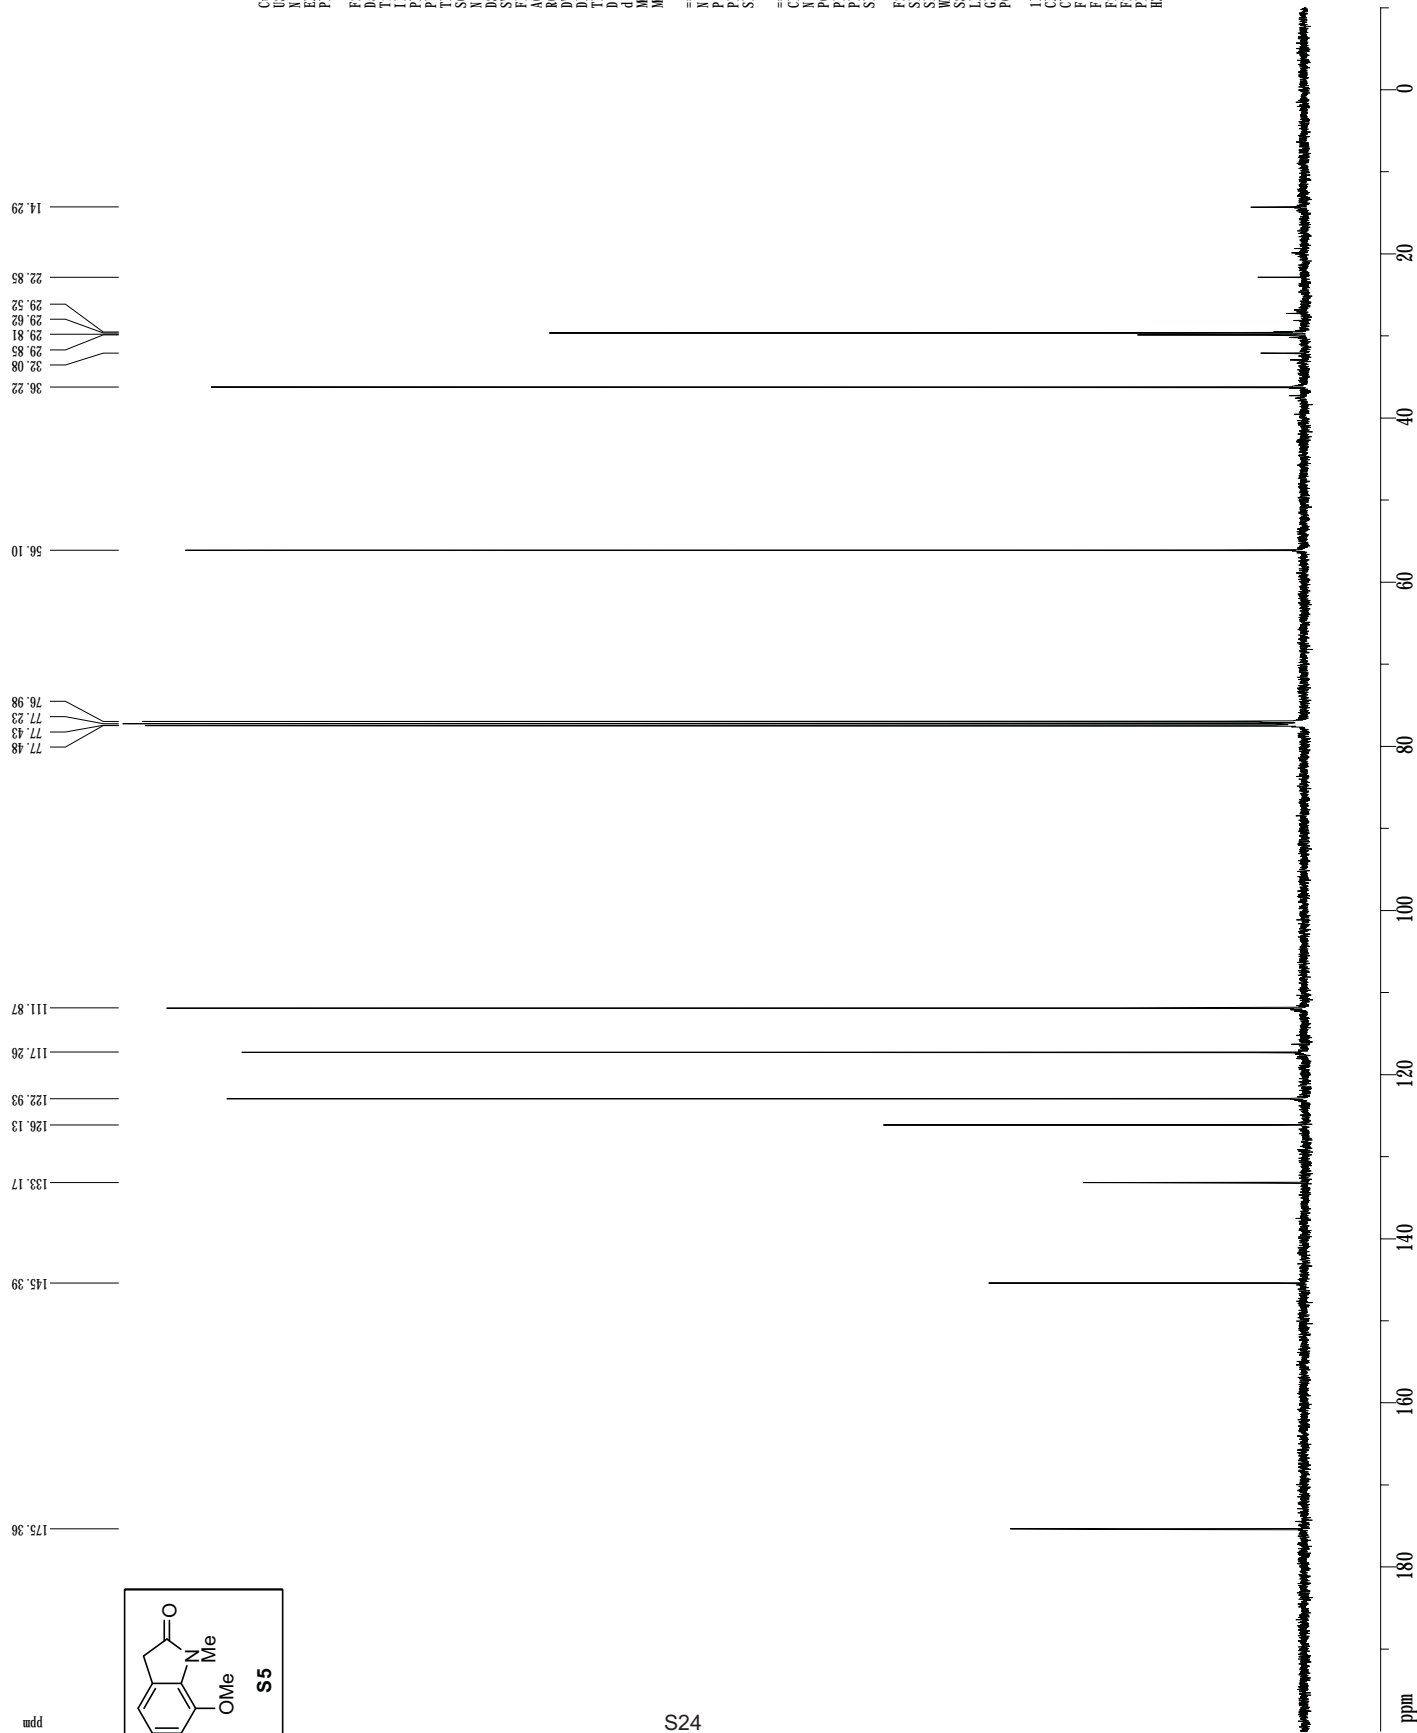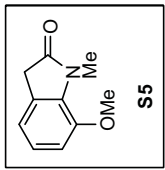

```

Current Data Parameters
=====
USER          mel11s
NAME          ME 1-103-a
EXPNO        3
PROCNO       1

F2 - Acquisition Parameters
=====
Date_        20080211
Time         13.07
INSTRUM      cryo500
PROBHD       5 mm CPTCI 1H-
PULPROG      zgpg30
TD           65418
SOLVENT      CDCl3
NS           197
DS           4
SWH          30303.031 Hz
FIDRES       0.463222 Hz
AQ           1.079470 sec
RG           11585.2
DW           16.500 usec
DE           6.00 usec
TE           298.0 K
D1           0.2500000 sec
d11          0.0300000 sec
d12          0.0000000 sec
d13          0.0000000 sec
d14          0.0150000 sec
d15          0.0150000 sec
d16          0.0150000 sec
d17          0.0150000 sec
d18          0.0150000 sec
d19          0.0150000 sec
d20          0.0150000 sec
d21          0.0150000 sec
d22          0.0150000 sec
d23          0.0150000 sec
d24          0.0150000 sec
d25          0.0150000 sec
d26          0.0150000 sec
d27          0.0150000 sec
d28          0.0150000 sec
d29          0.0150000 sec
d30          0.0150000 sec
=====
CHANNEL f1 -----
NUC1          13C
P1           14.75 usec
PL1          -1.00 dB
SFO1         125.7642546 MHz

=====
CHANNEL f2 -----
CPDPRG2      md1z16
NUC2          1H
P2           100.00 usec
PL2          1.60 dB
PL12         24.80 dB
SFO2         500.2225011 MHz

F2 - Processing parameters
=====
SI           65536
SF           125.7804062 MHz
WDW          EM
SSB          0
LB           1.00 Hz
GB           0
PC           2.00

ID MR plot parameters
=====
CA           22.80 cm
CY           15.65 cm
FIP          200.000 ppm
F1           25156.08 Hz
F2           -10.000 ppm
F3           -1257.80 Hz
PPMCM        9.21053 ppm/cm
HZCM         1158.50366 Hz/cm
    
```

**<sup>1</sup>H spectrum**

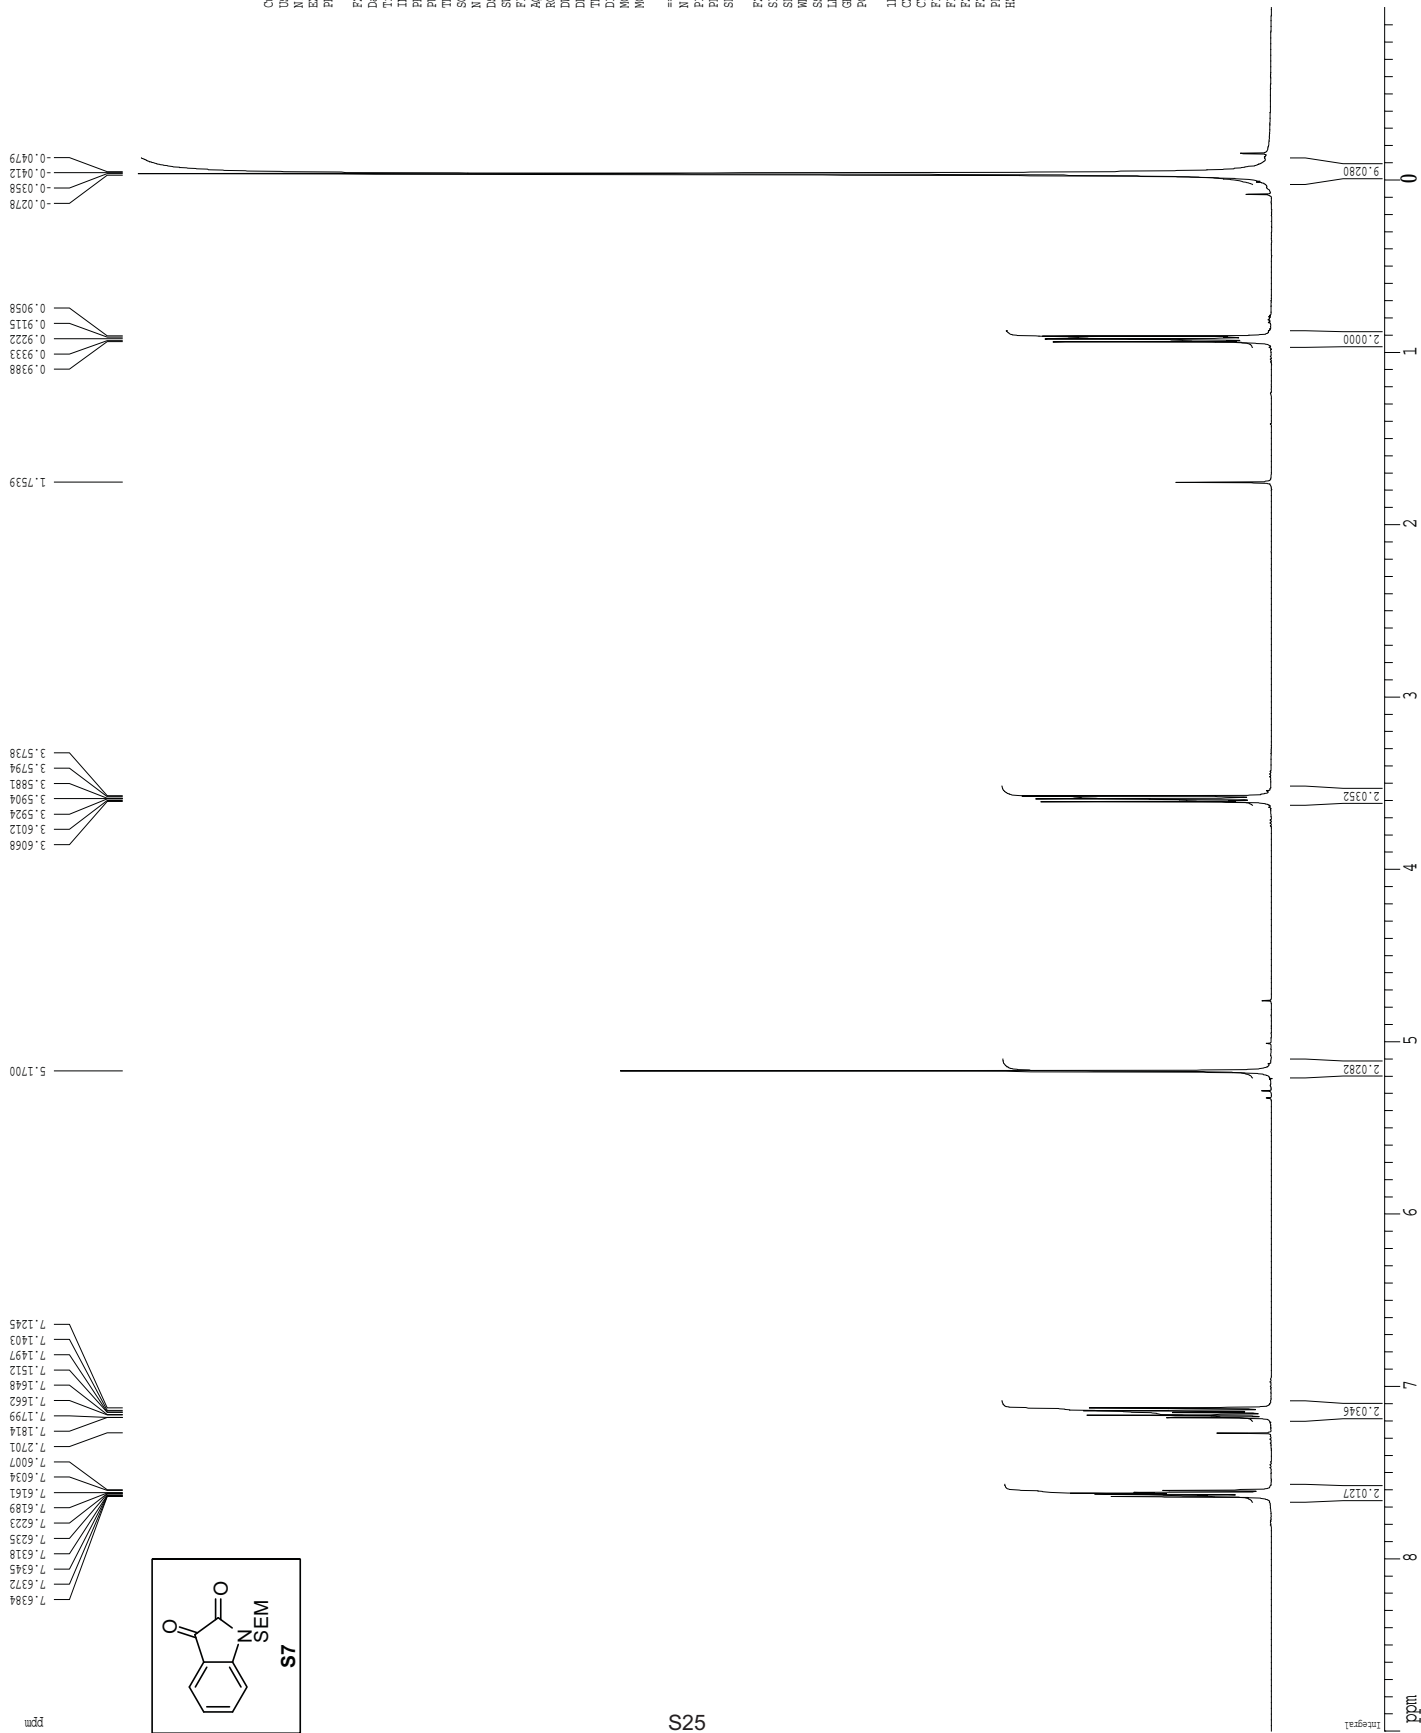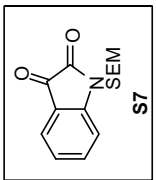

Current Data Parameters  
 USER: ranner  
 NAME: ht-1-semisatin  
 EXPNO: 1  
 PROCNO: 1

F2 - Acquisition Parameters  
 Date\_: 20070330  
 Time: 12.00  
 INSTRUM: crys500  
 PROBED: 5 mm CP131 JH-  
 PULPROG: zgpg30  
 TO: 4173  
 SOLVENT: CDCl3  
 NS: 8  
 DS: 2  
 SWH: 8012.620 Hz  
 FIDRES: 0.098643 Hz  
 AQ: 5.0398774 sec  
 RG: 3.6  
 DW: 62.400 usec  
 DE: 6.00 usec  
 TE: 298.0 K  
 D1: 0.1000000 sec  
 ACQRES1: 0.0000000 sec  
 ACQRES: 0.0150000 sec

===== CHANNEL f1 =====  
 NUC1: <sup>1</sup>H  
 P1: 8.00 usec  
 PL1: 1.60 dB  
 SFO1: 500.2235015 MHz

F2 - Processing parameters  
 SI: 65556  
 SF: 500.2200863 MHz  
 WDW: EM  
 SSB: 0  
 AB: 0  
 CB: 0  
 PC: 4.00

ID NMR plot parameters  
 CX: 22.80 cm  
 CY: 15.00 cm  
 FIP: 9.000 ppm  
 F1: 4501.98 Hz  
 F2P: -1.000 ppm  
 F2: -500.22 Hz  
 PUNCH: 0.43860 ppm/cm  
 HZCM: 219.39476 Hz/cm

**<sup>13</sup>C spectrum with <sup>1</sup>H decoupling**

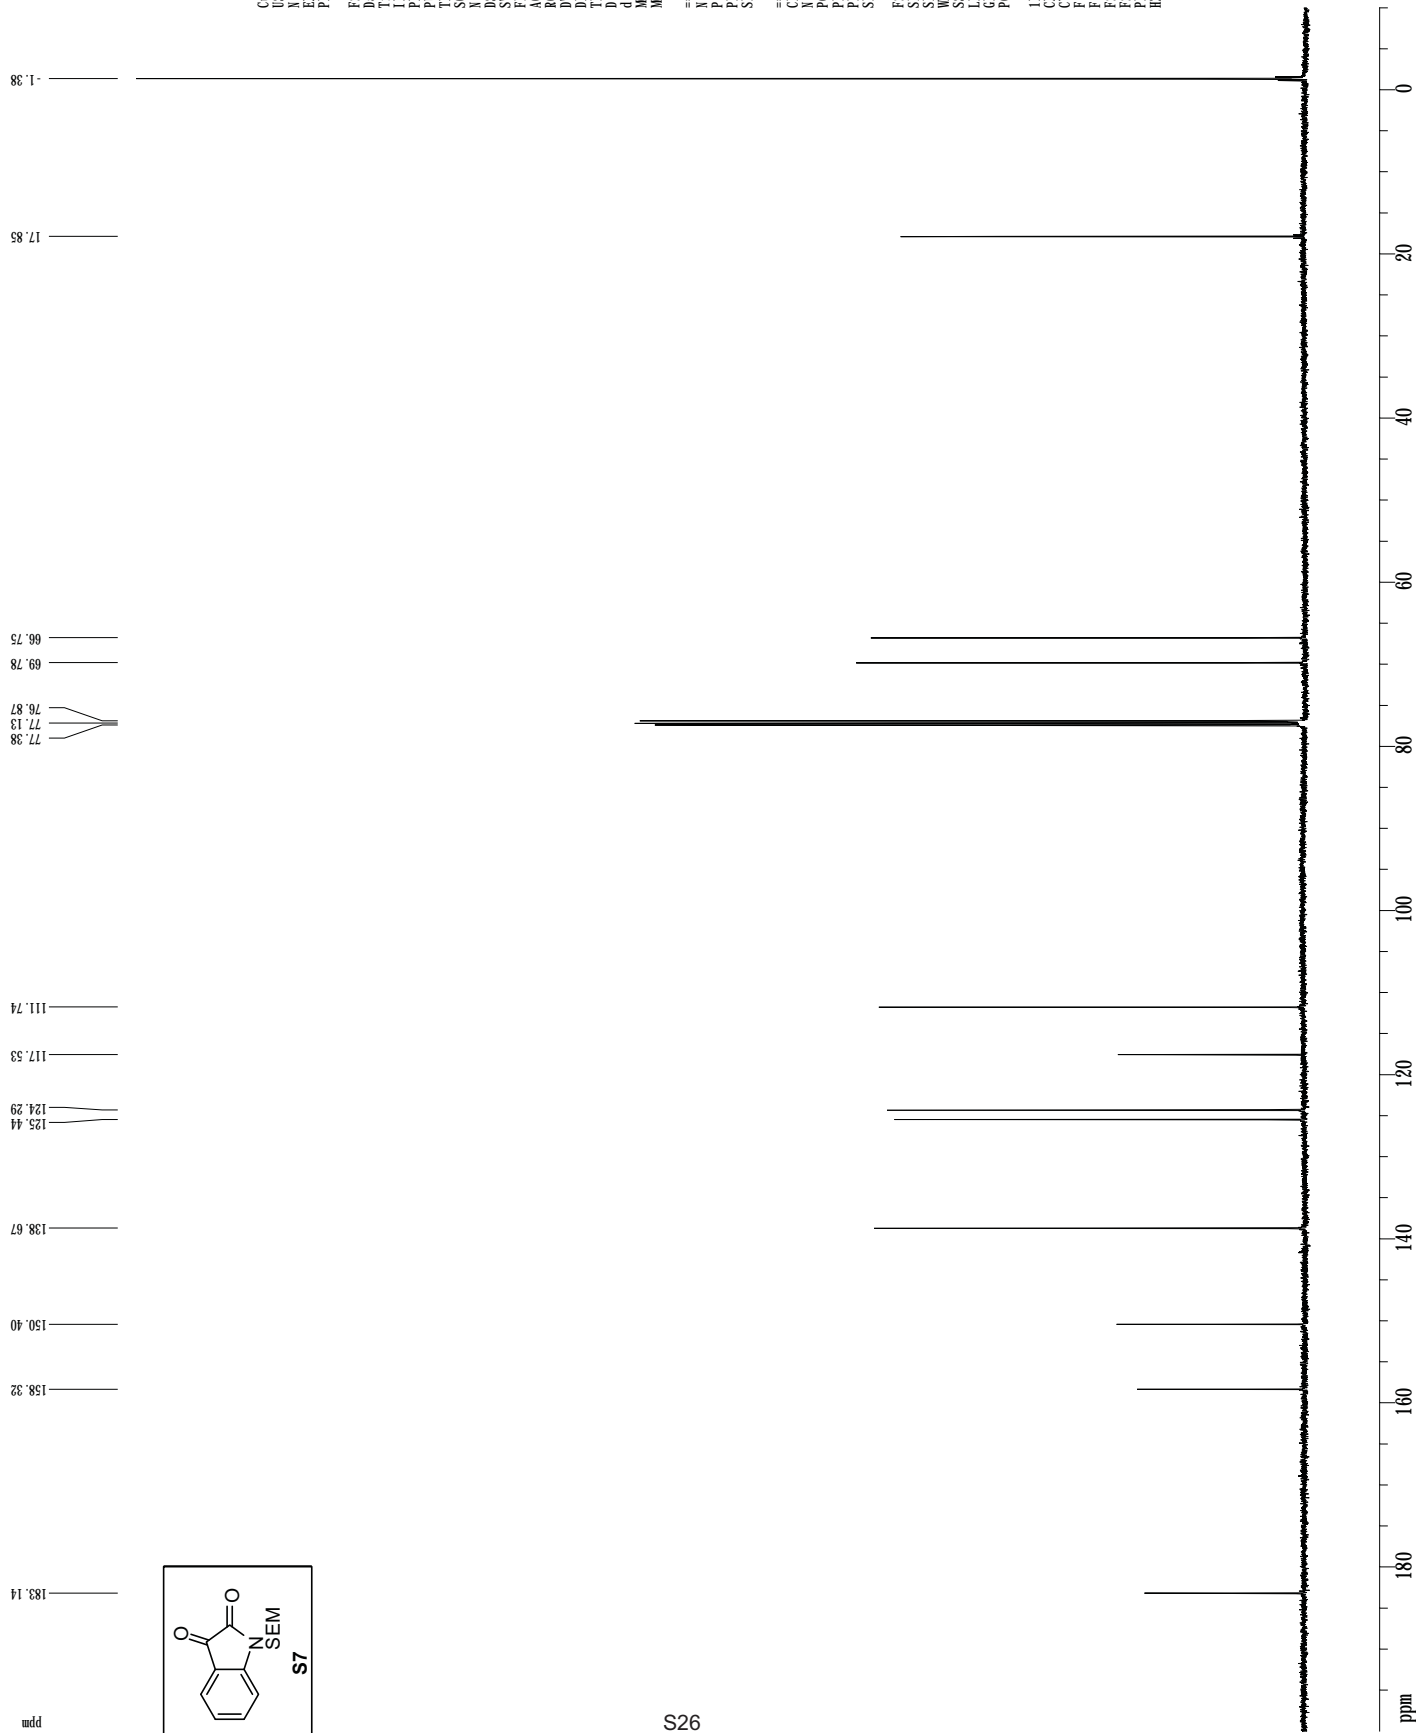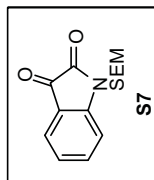

```

Current Data Parameters
USER:         Janner
NAME:         ht-1-semi sat in
EXPNO:        2
PROCNO:       1

F2 - Acquisition Parameters
Date_:        20070330
Time:         12.03
INSTRUM:      cryo500
PROBHD:       5 mm CPTCI IH
PULPROG:      zgpg30
TD:           65536
SOLVENT:      CDCl3
NS:           212
DS:           4
SWH:          30303.031 Hz
FIDRES:       0.462388 Hz
AQ:           1.0813040 sec
RG:           8192
DW:           16.500 usec
DE:           6.00 usec
TE:           298.0 K
D1:           0.25000000 sec
d11:          0.03000000 sec
d11:          0.00000000 sec
d11:          0.01500000 sec
MCWRRK:      0.01500000 sec

===== CHANNEL f1 =====
NUC1:         13C
P1:           15.00 usec
PL1:          -1.00 dB
SFO1:         125.7942346 MHz

===== CHANNEL f2 =====
CPDPRG2:      mrd tz16
NUC2:         1H
P2:           100.00 usec
PL2:          1.60 dB
PL12:         23.54 dB
SFO2:         500.2225011 MHz

F2 - Processing parameters
SI:           65536
SF:           125.7804190 MHz
WDW:          EM
SSB:          0
LB:           1.00 Hz
GB:           0
PC:           2.00

ID:           MR
===== ID MR plot parameters =====
CA:           22.80 cm
CY:           15.65 cm
FIP:          200.000 ppm
F1:           25156.08 Hz
F2:           -10.000 ppm
F2:           -1257.80 Hz
PPMCM:        9.21053 ppm/cm
HZCM:         1138.50378 Hz/cm
    
```

<sup>1</sup>H spectrum

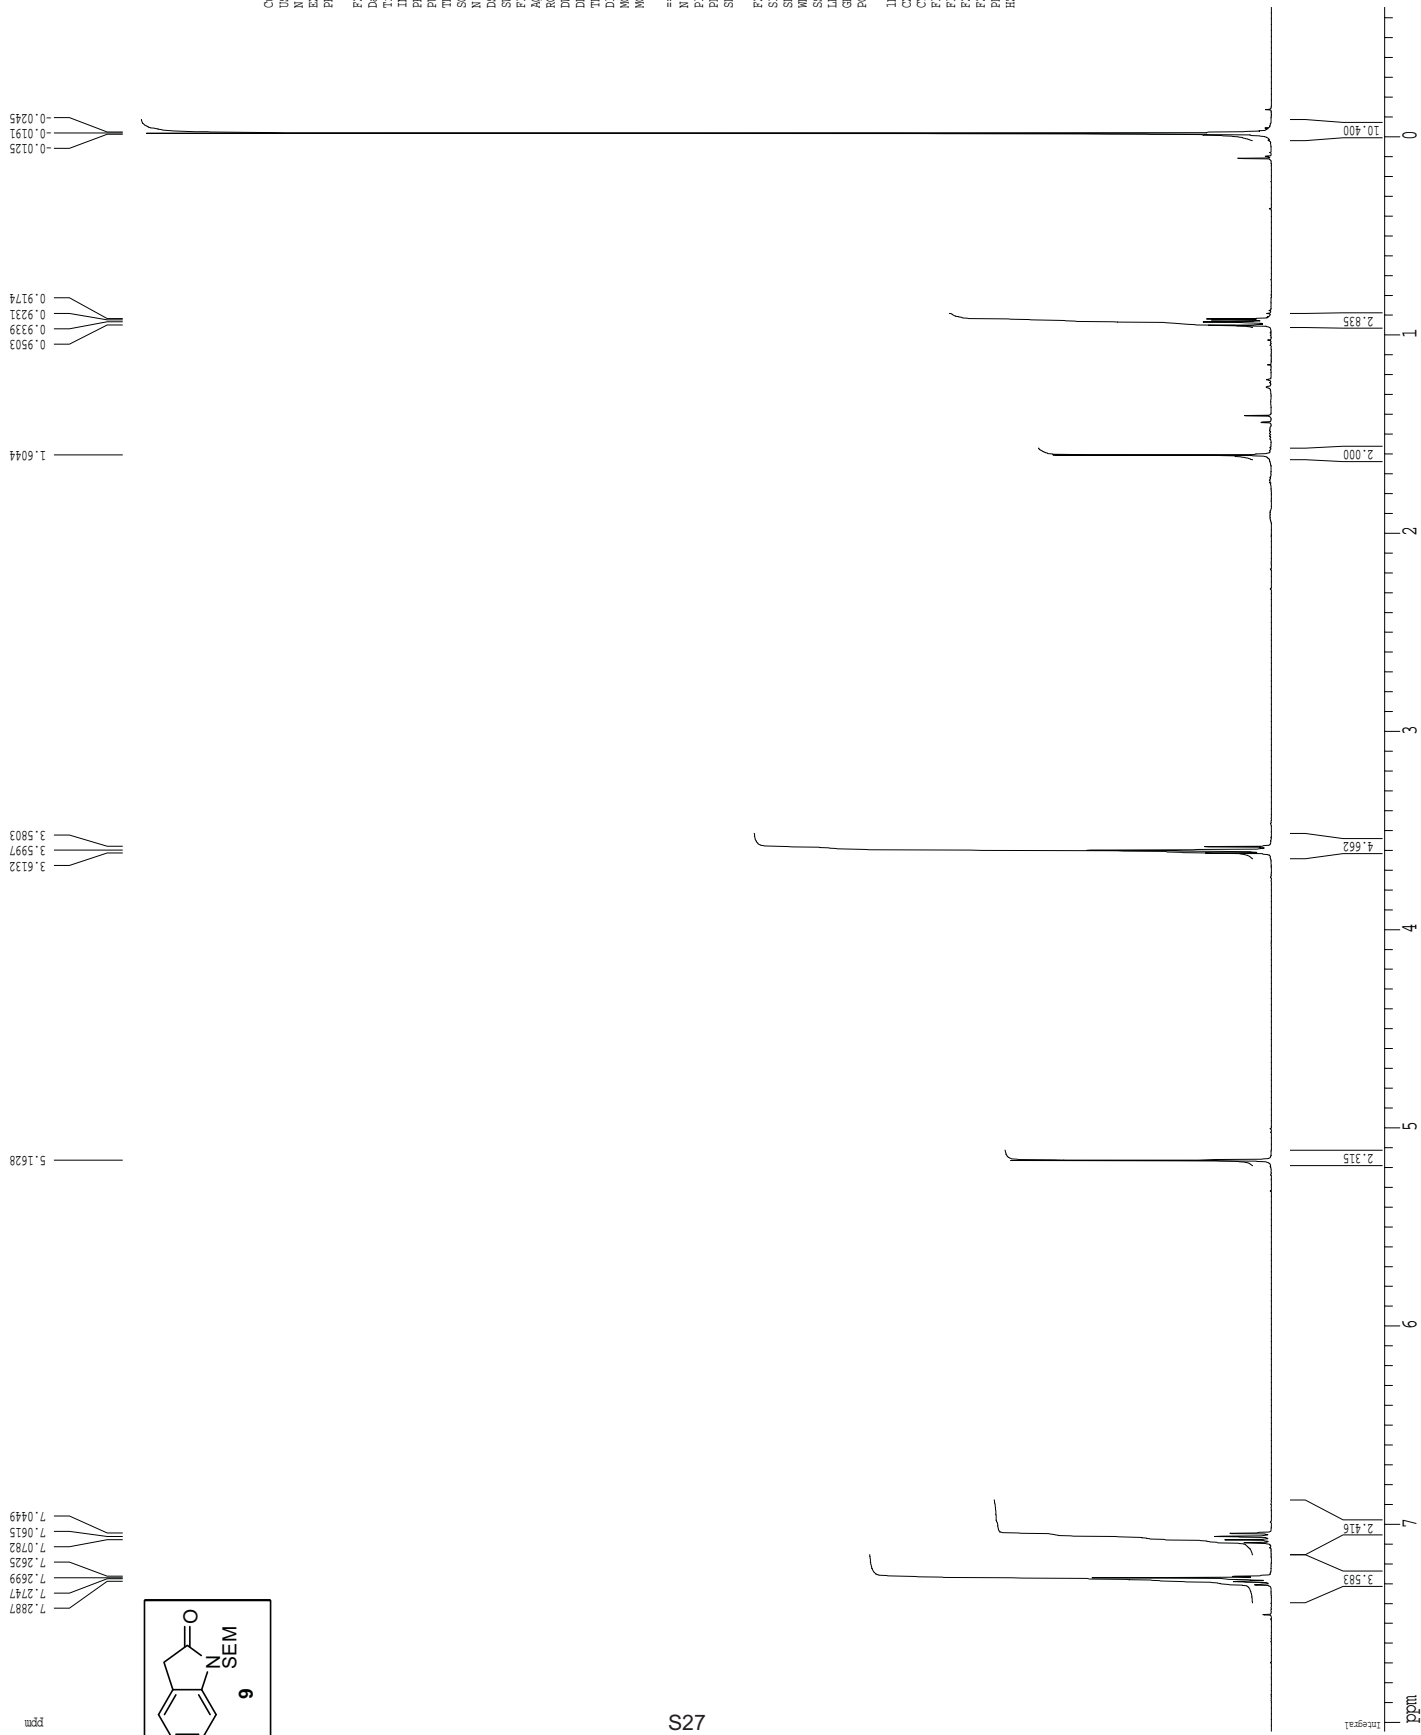

Current Data Parameters  
 USER: ranner  
 NAME: hr-1-139-2  
 EXPNO: 1  
 PROCNO: 1

F2 - Acquisition Parameters  
 Date\_: 20070122  
 Time: 12:51  
 INSTRUM: cryso00  
 PROBED: 5 mm CPXI 1H-  
 PULPROG: zgpg30  
 TO: 81.28  
 SOLVENT: CDCl3  
 NS: 8  
 DS: 2  
 SWH: 8012.820 Hz  
 FIDRES: 0.098843 Hz  
 AQ: 5.0989774 sec  
 RG: 8  
 DW: 62.400 usec  
 DE: 6.00 usec  
 TE: 298.0 K  
 D1: 0.1000000 sec  
 ACQRES: 0.0000000 sec  
 ACQRX: 0.0150000 sec

===== CHANNEL f1 =====  
 NUC1: 1H  
 P1: 8.00 usec  
 PL1: 1.60 dB  
 SFO1: 500.2235015 MHz

F2 - Processing parameters  
 SI: 65536  
 SF: 500.2200955 MHz  
 WDW: EM  
 SSB: 0  
 CB: 0  
 GB: 0  
 PC: 4.00

ID NMR plot parameters  
 CX: 22.80 cm  
 CY: 15.00 cm  
 FIP: 8.043 ppm  
 F1: 4023.24 Hz  
 F2P: -0.652 ppm  
 F2: -326.32 Hz  
 PPM0: 0.38137 ppm/cm  
 HZ0: 190.7682 Hz/cm



<sup>13</sup>C spectrum with <sup>1</sup>H decoupling

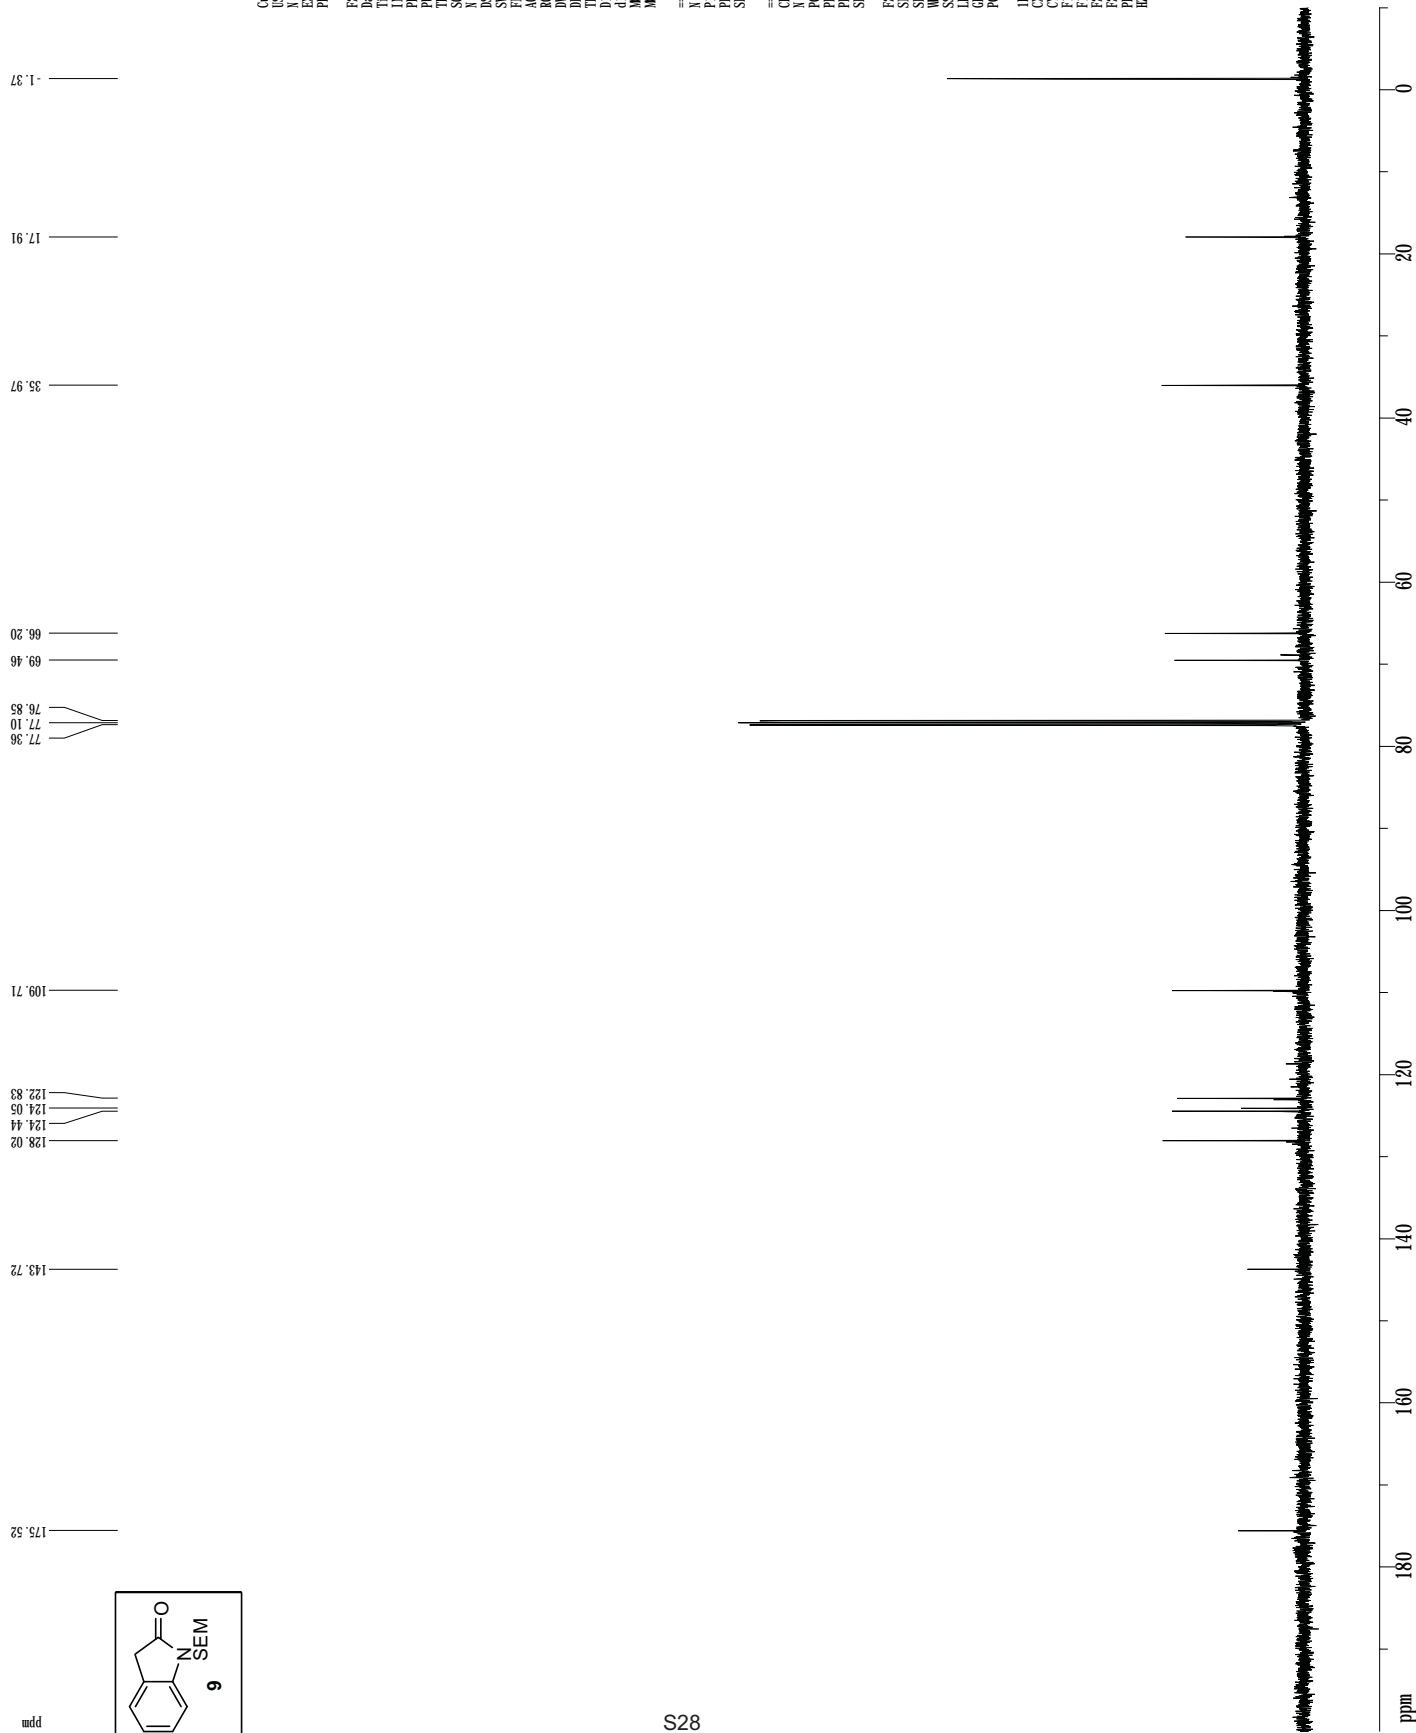

```

Current Data Parameter
=====
USER          Ramer
NAME          ht-1-semoxindole
EXPNO        3
PROCNO       1

F2 - Acquisition Parameter
Date_        20070330
Time         13.21
INSTRUM      cryo500
PROBHD       5 mm CPCL H-
PULPROG      zgpg30
TD           65536
SOLVENT      CDCl3
NS           19
DS           4
SWH          30303.031 Hz
FIDRES       0.462388 Hz
AQ           1.0813840 sec
RG           8192
DW           16.500 usec
DE           6.00 usec
TE           298.0 K
D1           0.2500000 sec
d11          0.0300000 sec
d12          0.0000000 sec
d13          0.0000000 sec
d14          0.0150000 sec
d15          0.0150000 sec
===== CHANNEL f1 =====
NUC1         13C
P1           15.00 usec
PL1         -1.00 dB
SFO1        125.7942548 MHz

===== CHANNEL f2 =====
CPDPRG2      waltz16
NUC2         1H
PCPD2       100.00 usec
PL2         1.60 dB
PL12        23.34 dB
SFO2        500.2253011 MHz

F2 - Processing parameters
SI           65536
SF          125.7804190 MHz
WDW         EM
SSB         0
LB          1.00 Hz
GB          0
PC          2.00

ID MR plot parameter
CX          22.80 cm
CI          7.50 cm
FP         900.000 ppm
F1         25155.00 Hz
F2         10.000 ppm
F3         -1257.80 Hz
PP4M        9.21053 ppm/cm
HZCM        1158.50378 Hz/cm
    
```

1H spectrum

- 7.5458
- 7.5355
- 7.4531
- 7.4989
- 7.4320
- 7.31086
- 7.30239
- 7.28621
- 7.27013
- 7.26217
- 7.25283
- 7.05707
- 7.04202
- 7.02700
- 6.78000
- 6.76498

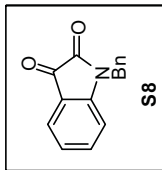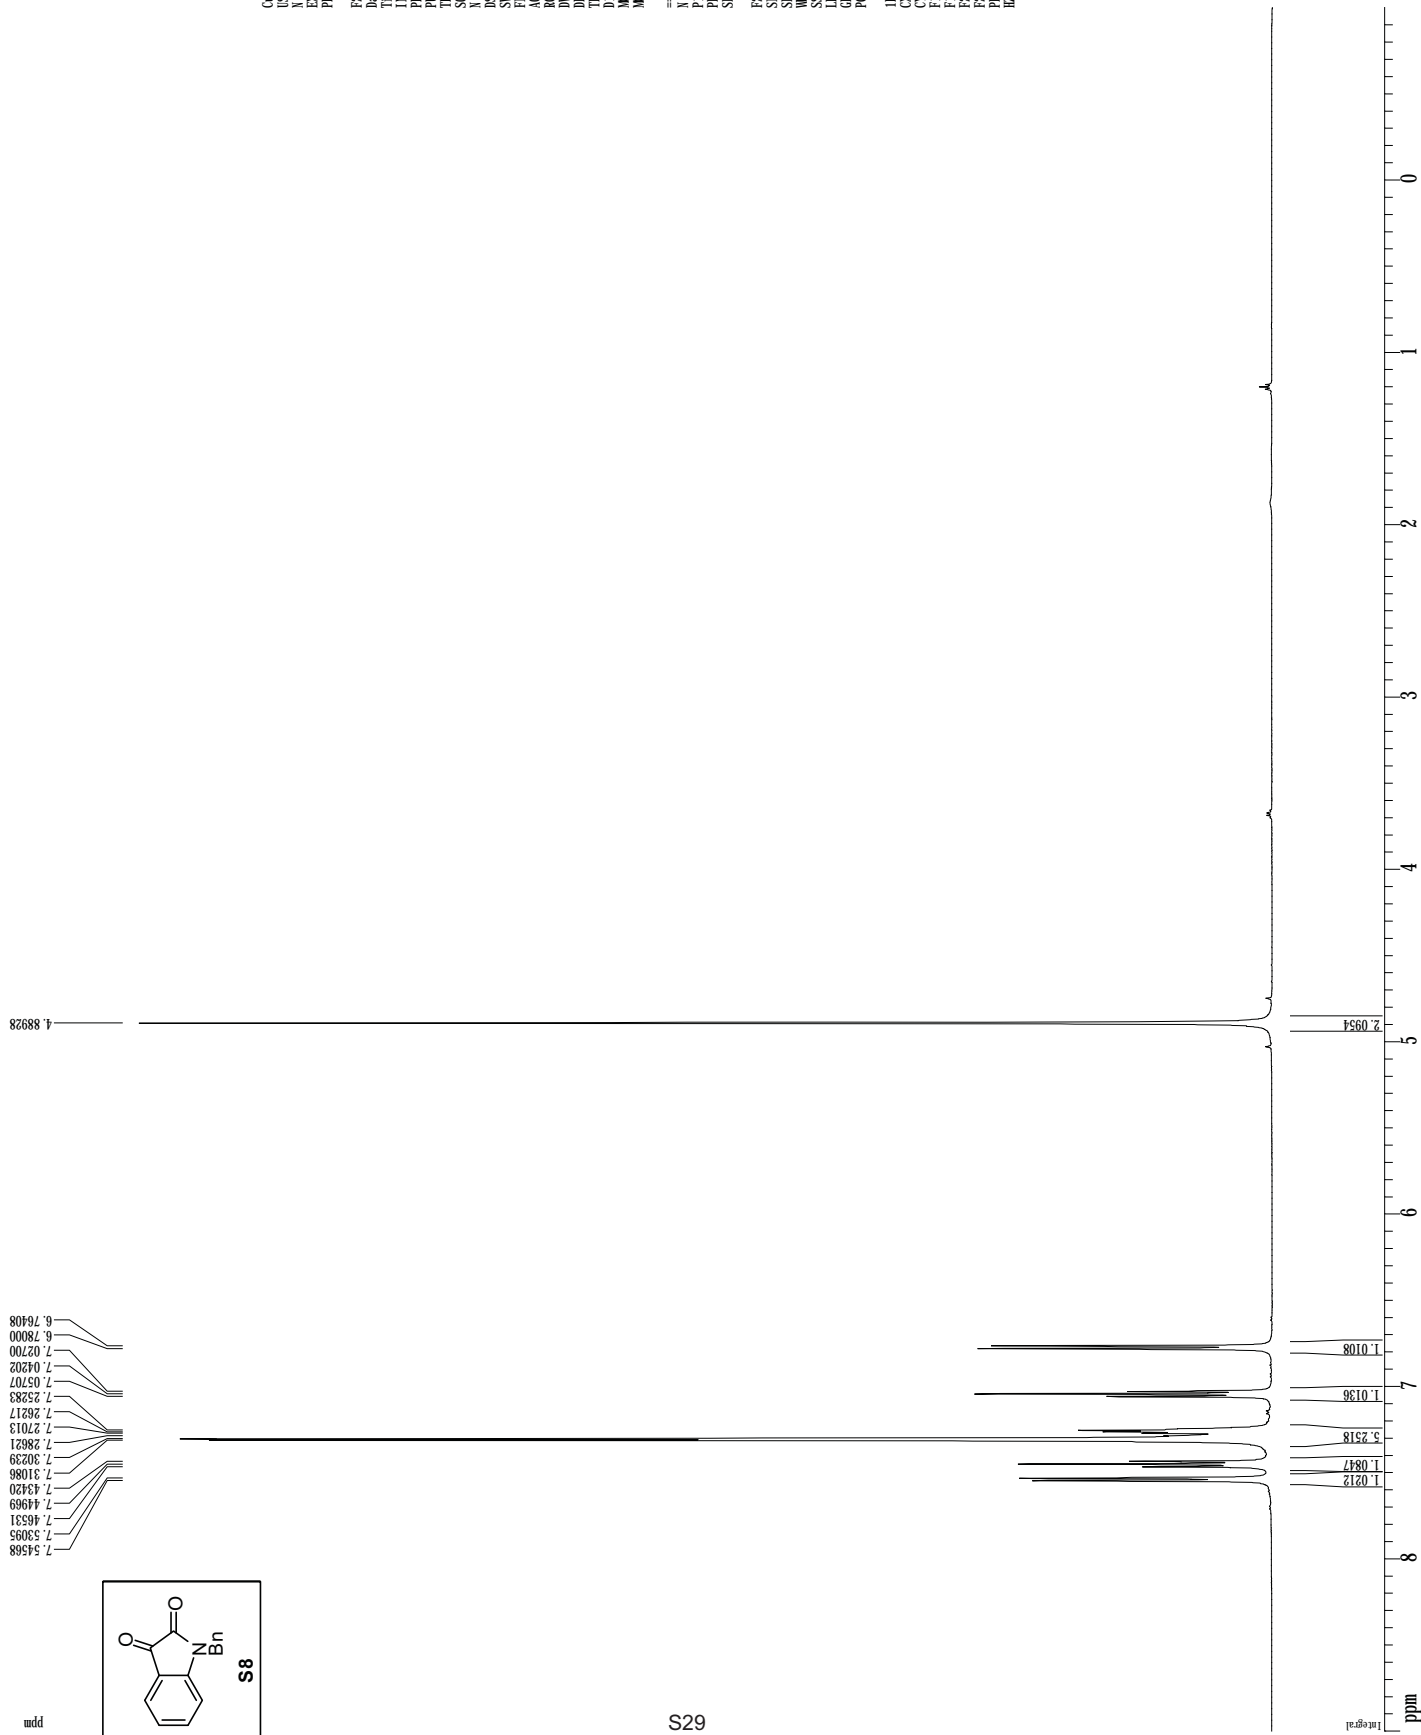

Current Data Parameters  
 USER mel1s  
 NAME ME 1-62  
 EXPNO 1  
 PROCNO 1

F2 - Acquisition Parameters  
 Date\_ 20071128  
 Time 8.04  
 INSTRUM gpc500  
 PULPROG zgpg30  
 FIDRES 5 mm broadband  
 TD 65536  
 SFO1 499.8234988 MHz  
 SOLVENT CDCl3  
 NS 8  
 DS 2  
 SWH 8012.820 Hz  
 FIDRES 0.098043 Hz  
 AQ 5.0989774 sec  
 RG 45.3  
 DW 62.400 usec  
 DE 6.00 usec  
 TE 298.0 K  
 AQC 0.1000000 sec  
 MCHST 0.4000000 sec  
 MCWK 0.0150000 sec

===== CHANNEL f1 =====  
 NU1 1H  
 P1 12.00 usec  
 PL1 -3.00 dB  
 SFO1 499.8234988 MHz

F2 - Processing parameters  
 SI 65536  
 SF 499.8250038 MHz  
 MDW EM  
 SSB 0 Hz  
 GB 0  
 PC 4.00

ID MR plot parameters  
 CX 22.80 cm  
 CY 15.00 cm  
 FIP 9.000 ppm  
 FI 4498.43 Hz  
 F2P -1.000 ppm  
 F2 -499.83 Hz  
 PPMCM 0.43860 ppm/cm  
 HZCM 219.22151 Hz/cm

13C spectrum with 1H decoupling

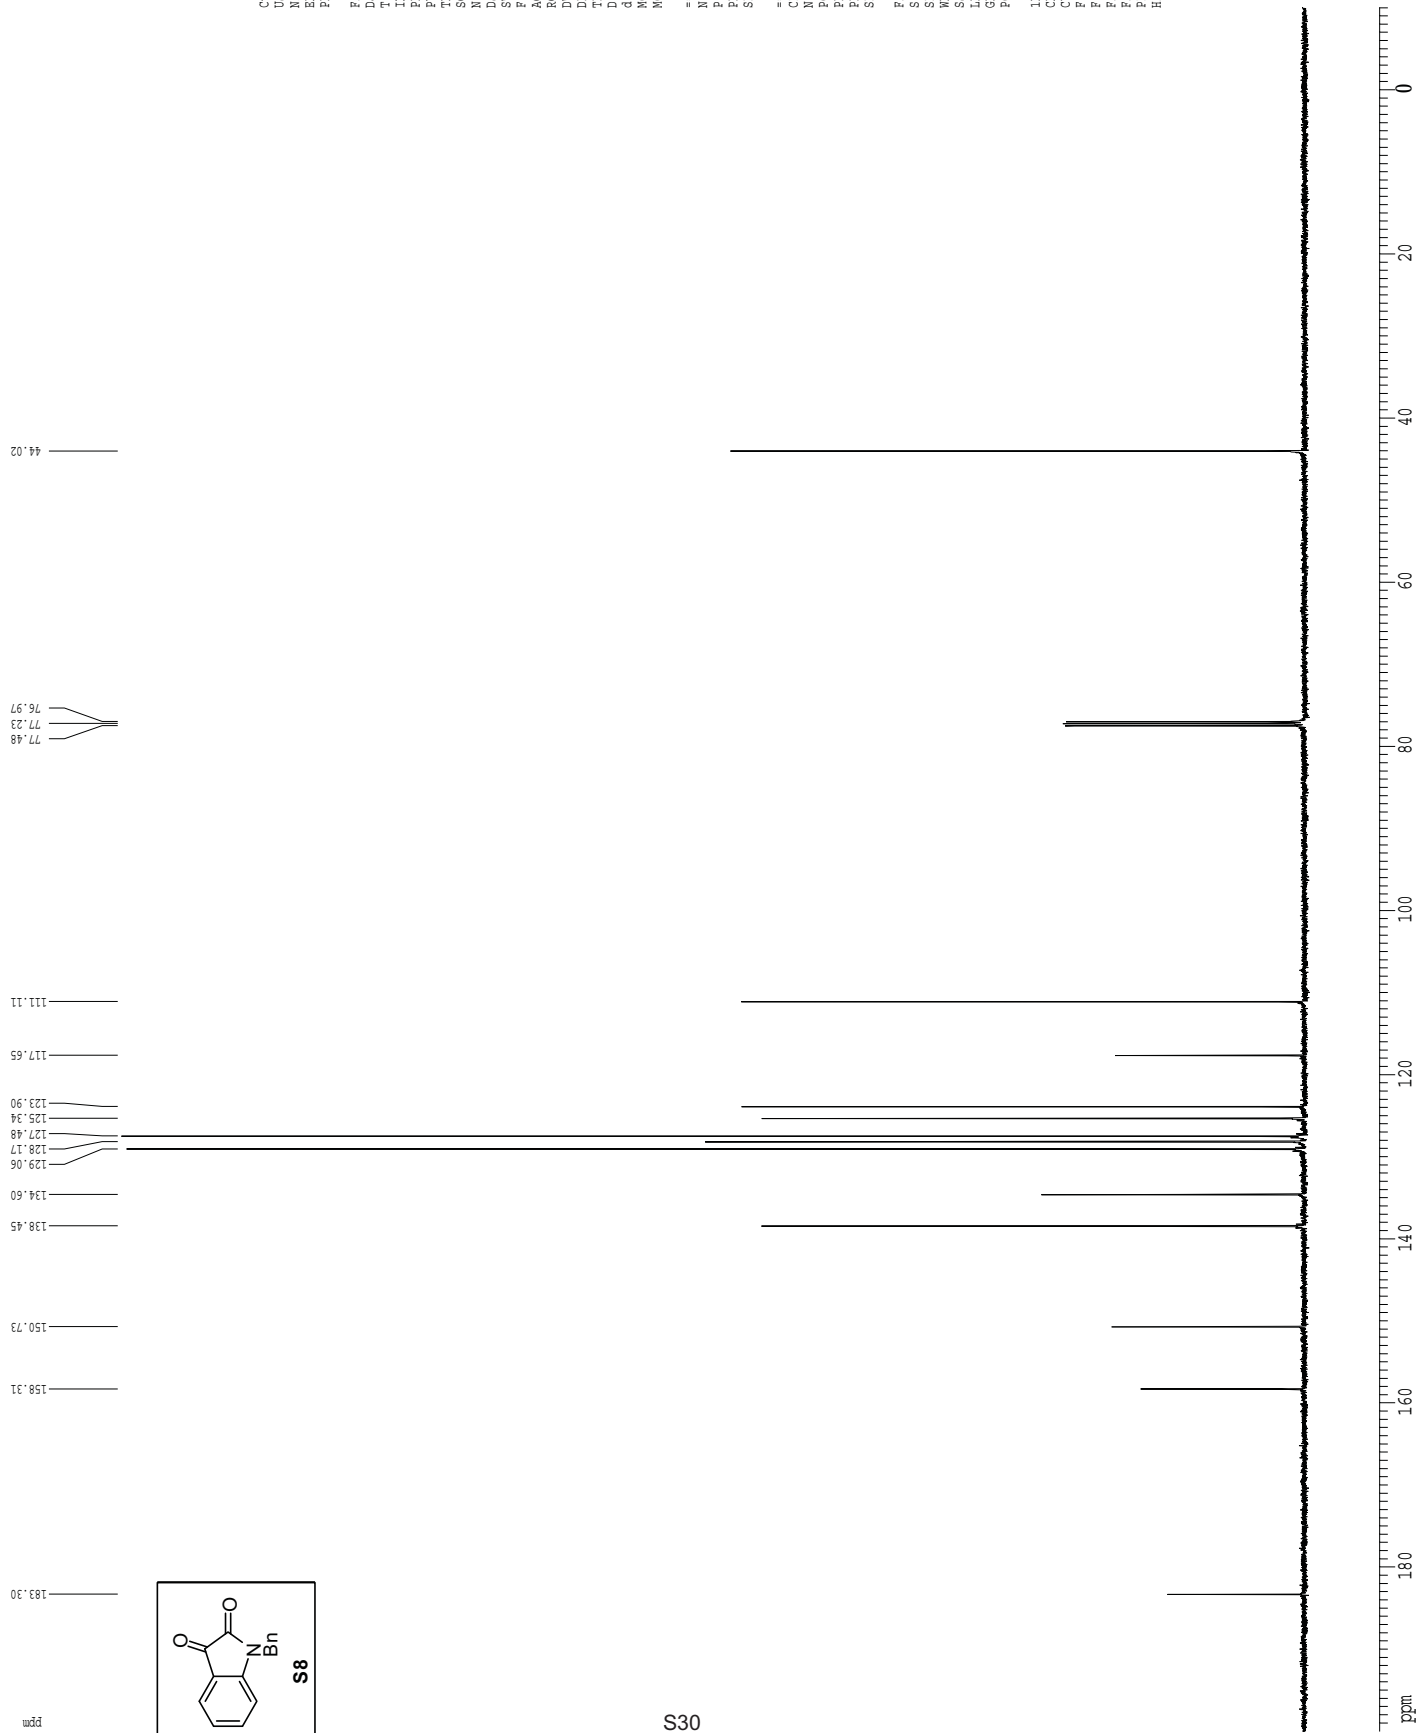

```

Current Data Parameters
USER      mellis
NAME      ME 1-62
EXNO      2
PROCNO    1

F2 - Acquisition Parameters
Date_     20071128
Time      8.07
INSTRUM   gm500
PROBHD    5 mm broadband
PULPROG   zgpg30
TD         65536
SOLVENT   CDCl3
NS         245
DS         4
SFO1      30303.031 Hz
FIDRES    0.462386 Hz
AQ         1.0813846 sec
RG         3253
DM         16.500 usec
DE         4.50 usec
TE         298.0 K
D1         0.25000000 sec
d11        0.03000000 sec
MCREST    0.00000000 sec
MORF1     0.01500000 sec

===== CHANNEL F1 =====
NUC1       13C
P1         7.08 usec
PL1        0.00 dB
SFO1      125.694209 MHz

===== CHANNEL F2 =====
CPDPRG2   waltz16
NUC2       1H
PCPD2     80.00 usec
PL2        -3.00 dB
PL12      14.70 dB
SFO2      499.8774991 MHz

F2 - Processing parameters
SI         65536
SF         125.6810889 MHz
WDW        EM
SSB        0
GB         0
PC         2.00

1D NMR plot parameters
AQ         12.80 sec
EX         15.00 cm
FIDRES    0.462386 Hz
F1P        200.000 ppm
F1         25136.22 Hz
F2P        -10.000 ppm
F2         -1256.81 Hz
PRNCM     9.21053 ppm/cm
HZCM      1157.58899 Hz/cm
    
```

**<sup>1</sup>H spectrum**

7.32262  
7.30746  
7.30107  
7.28627  
7.27066  
7.23981  
7.22474  
7.20100  
7.18629  
7.13656  
7.12109  
6.98915  
6.97420  
6.95920  
6.71907  
6.70341

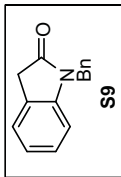

4.88281  
3.53181

Current Data Parameters  
 USER mel11s  
 NAME ME 1-63  
 EXPNO 1  
 PROCNO 1

F2 - Acquisition Parameters  
 Date\_ 20071128  
 Time 8.24  
 INSTRUM gpc500  
 PULPROG zgpg30  
 5 mm broadband  
 F1PRG zgpg30  
 TD 65536  
 SFO1 400.146363  
 SOLVENT CDCl3  
 NS 8  
 DS 2  
 SWH 8012.620 Hz  
 FIDRES 0.098843 Hz  
 AQ 5.098974 sec  
 RG 20.2  
 DW 62.400 usec  
 DE 6.00 usec  
 TE 298.0 K  
 0.1000000 sec  
 ACQST 0.1000000 sec  
 MCWK 0.0150000 sec

==== CHANNEL f1 =====  
 NUC1 <sup>1</sup>H  
 P1 12.00 usec  
 PL1 -3.00 dB  
 SFO1 400.823488 MHz

F2 - Processing parameters  
 SI 65536  
 SF 498.855047 MHz  
 EQ EM  
 ASB 0 Hz  
 GB 0  
 PC 4.00

ID NR plot parameters  
 CX 22.80 cm  
 CY 15.00 cm  
 FIP 9.000 ppm  
 FI 4498.43 Hz  
 F2P -1.000 ppm  
 F2 -499.83 Hz  
 PPMCM 0.43860 ppm/cm  
 HZCM 219.22151 Hz/cm

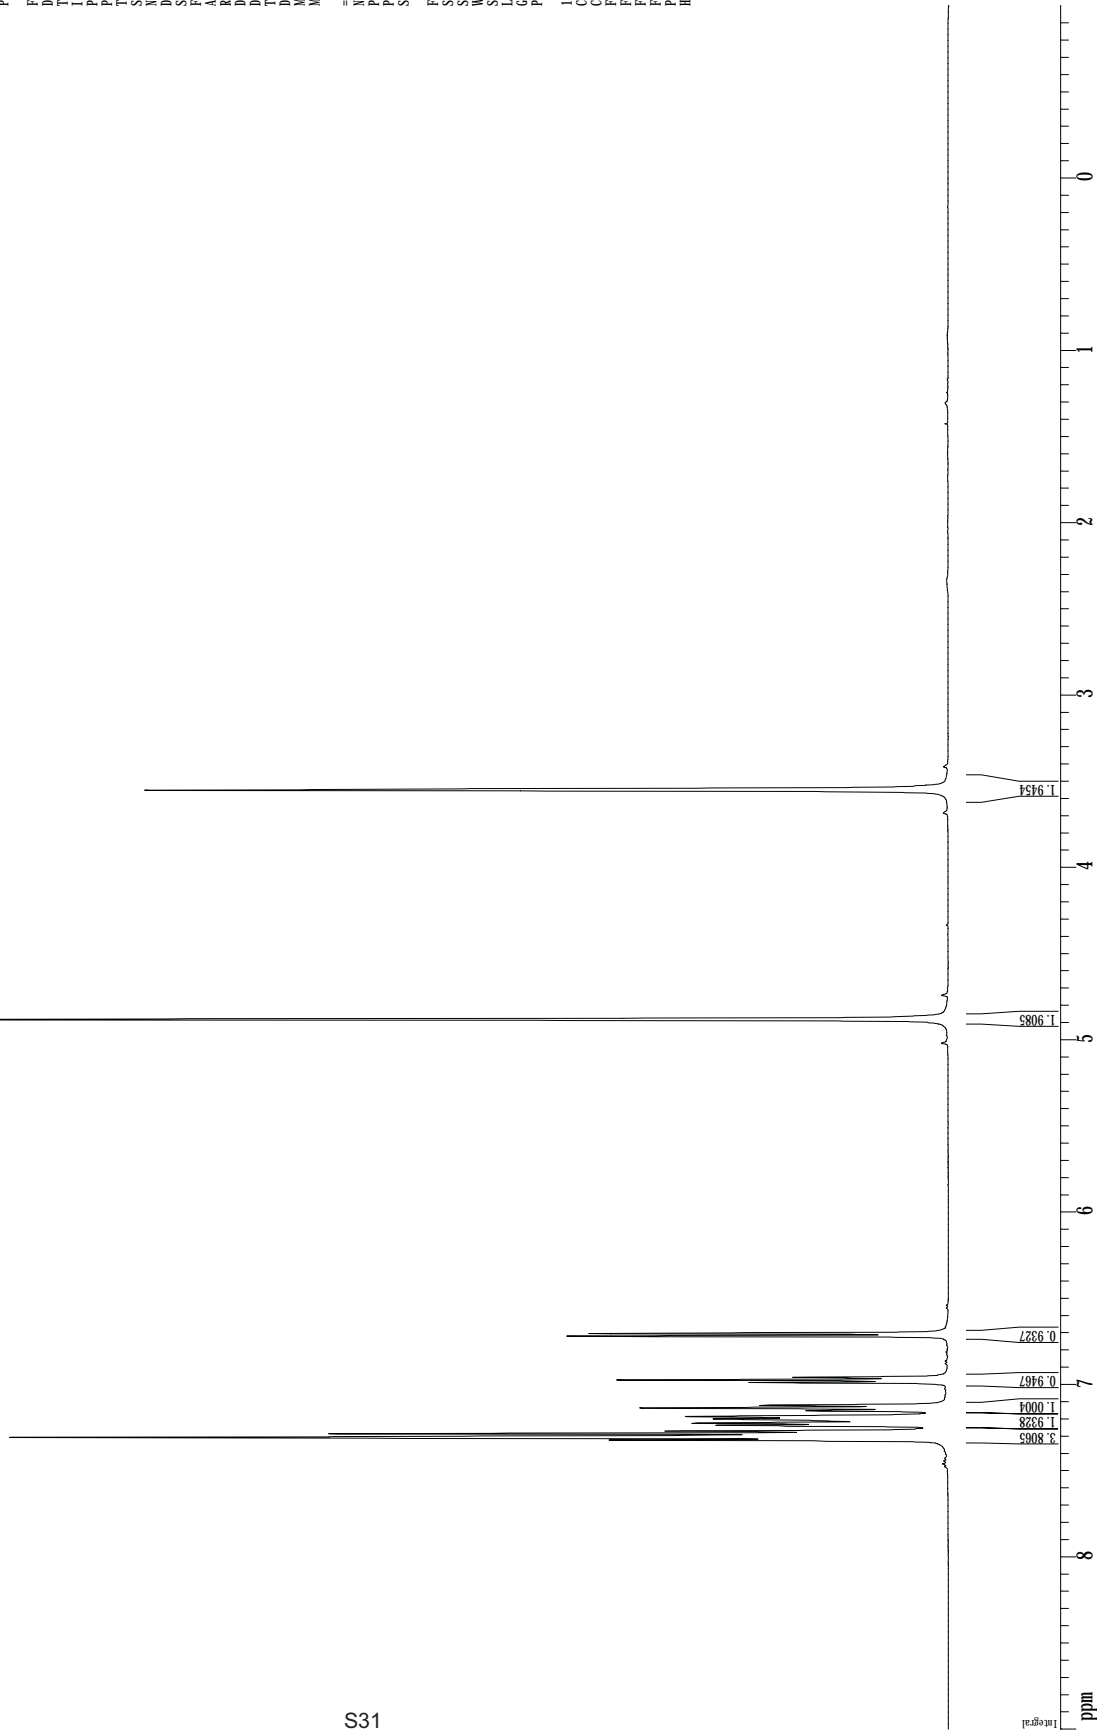

<sup>13</sup>C spectrum with <sup>1</sup>H decoupling

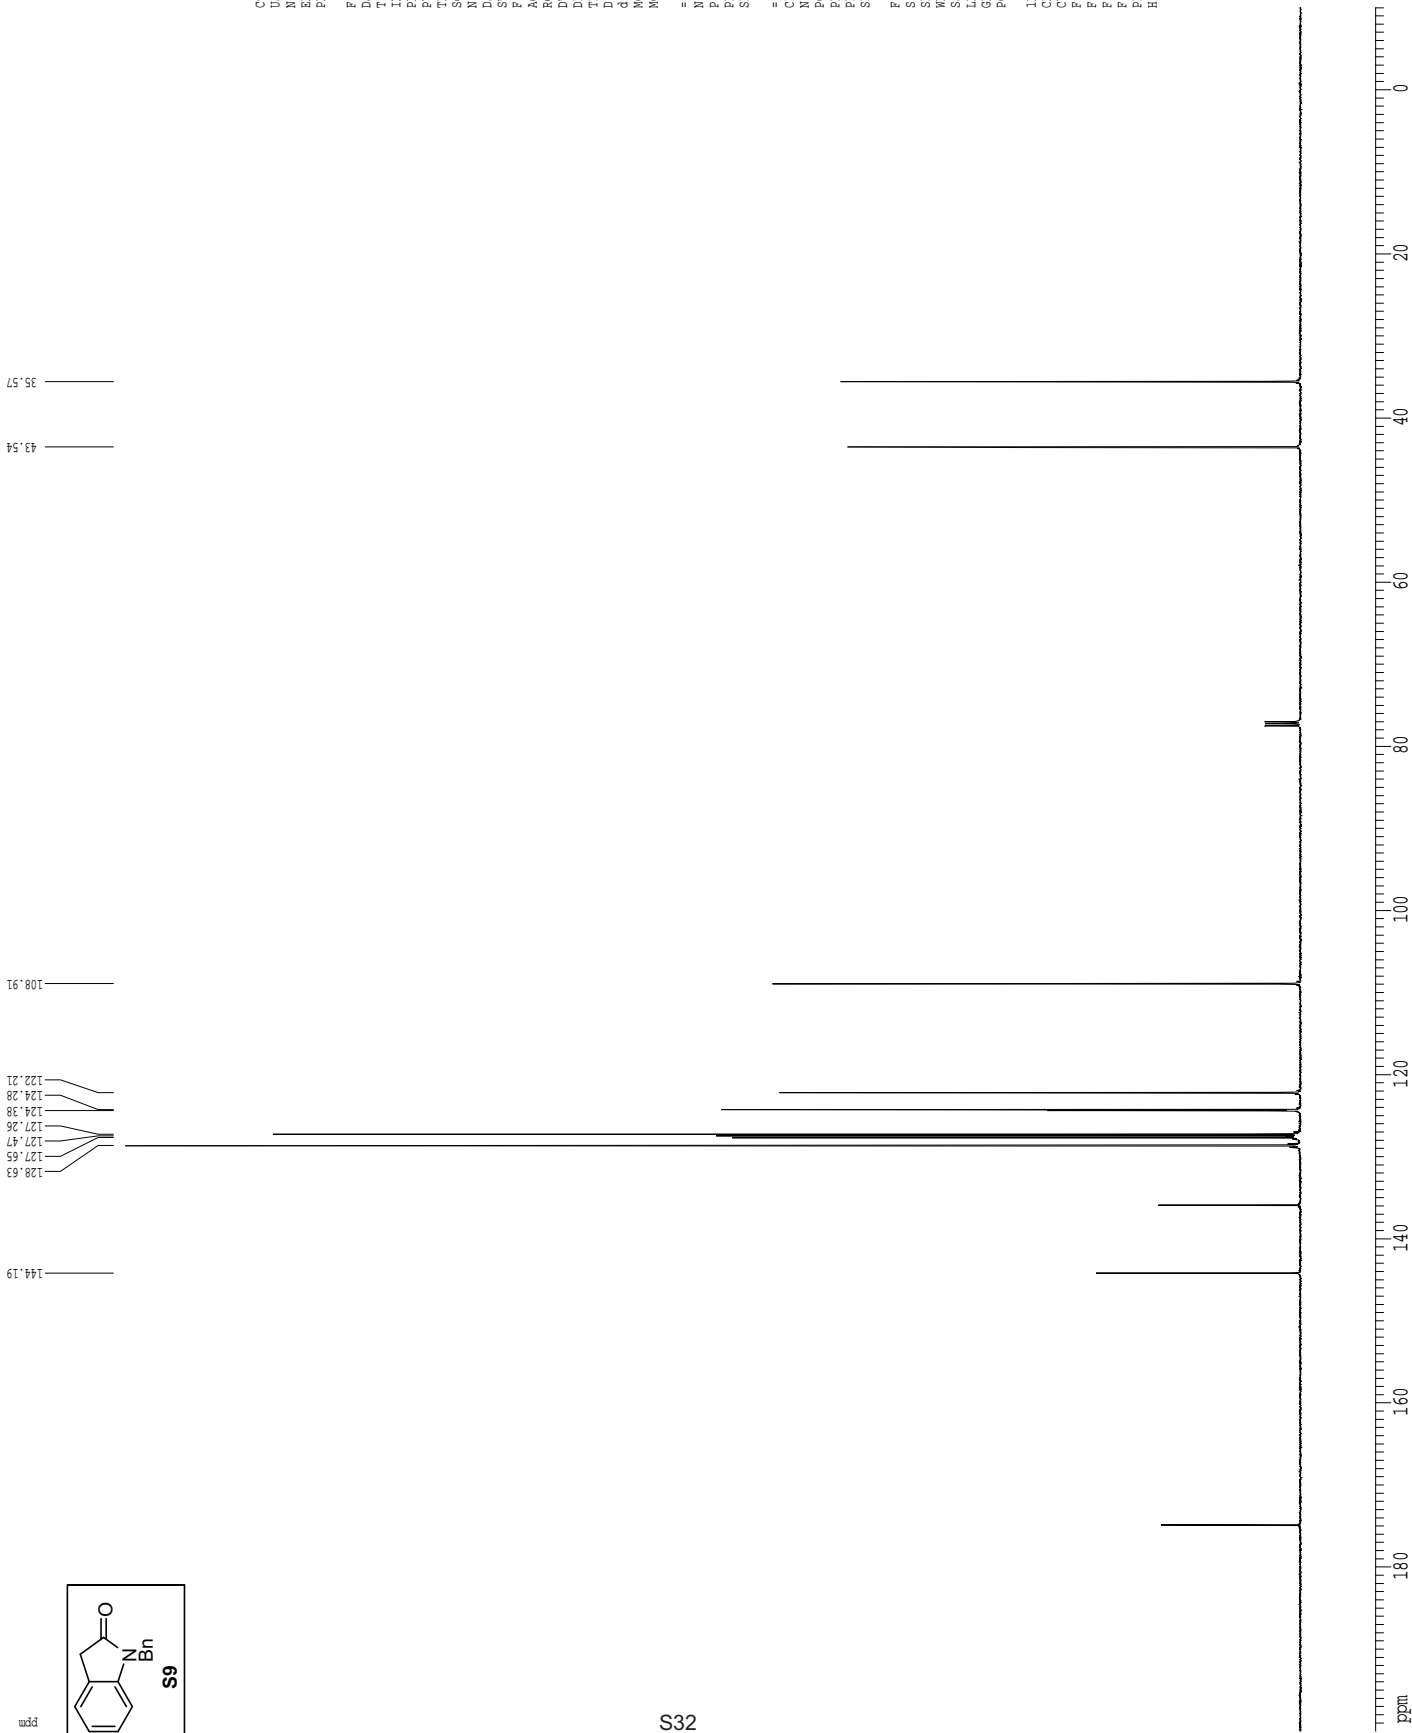

```

Current Data Parameters
USER      mellis
NAME      ME 1-63
EXNO      2
PROCNO    1

F2 - Acquisition Parameters
Date_     20071128
Time      8.27
INSTRUM   gm500
PROBHD    5 mm broadband
PULPROG   zgpg30
TD         65536
SOLVENT   CDCl3
NS         512
DS         4
SFO1      30303.031 Hz
FIDRES    0.462388 Hz
AQ         1.0813846 sec
RG         5792.6
DM         16.500 usec
DE         4.50 usec
TE         298.0 K
D1         0.25000000 sec
d11        0.03000000 sec
MCREST    0.00000000 sec
MCREK     0.01500000 sec

===== CHANNEL F1 =====
NUC1       13C
P1         7.08 usec
PL1        0.00 dB
SFO1      125.694209 MHz

===== CHANNEL F2 =====
CPDPRG2   waltz16
NUC2       1H
PCPD2      80.00 usec
PL2        -1.00 dB
PL12       14.70 dB
SFO2      499.8774931 MHz

F2 - Processing parameters
SI         65536
SF         125.6811238 MHz
WDW        EM
SSB        0
LB         1.00 Hz
GB         0
PC         2.00

LD NMR plot parameters
AQ         2.20 sec
SI         65536
FIDRES    0.462388 Hz
F1         200.000 ppm
F2         25136.22 Hz
F3         -10.000 ppm
F4         -1256.83 Hz
PRNCM     9.21053 ppm/cm
HZCM      1157.58923 Hz/cm
    
```

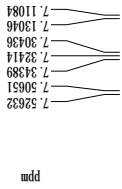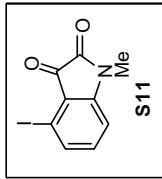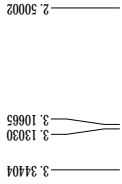

Current Data Parameters  
 USER Lamer  
 XNAME ep-11-258  
 EXPNO 4  
 PROCNO 1

F2 - Acquisition Parameters  
 Date\_ 2003120  
 Time 17.19  
 INSTRUM drx400  
 PROBHD 5 mm QNP H/F  
 PULPROG zgpg30  
 TD 65536  
 SOLVENT DMSO  
 NS 8  
 DS 2  
 SWH 6440.256 Hz  
 FIDRES 0.097813 Hz  
 AQ 5.118579 sec  
 RG 203.2  
 DW 78.000 usec  
 DE 4.50 usec  
 TE 300.0 K  
 D1 0.1000000 sec

===== CHANNEL f1 =====  
 NUC1 1H  
 P1 12.00 usec  
 PL1 0.00 dB  
 SF01 400.1328069 MHz

F2 - Processing parameters  
 SFO 400.130073 MHz  
 SF 65536  
 WDW EM  
 SSB 0  
 LB 0.30 Hz  
 GB 0  
 PC 2.00

ID MR plot parameters  
 CX 22.80 cm  
 CY 8.34 cm  
 FIP 8.000 ppm  
 F1 3201.04 Hz  
 F2 -1.000 ppm  
 PPM0 0.38474 ppm/cm  
 HZCM 137.94606 Hz/cm

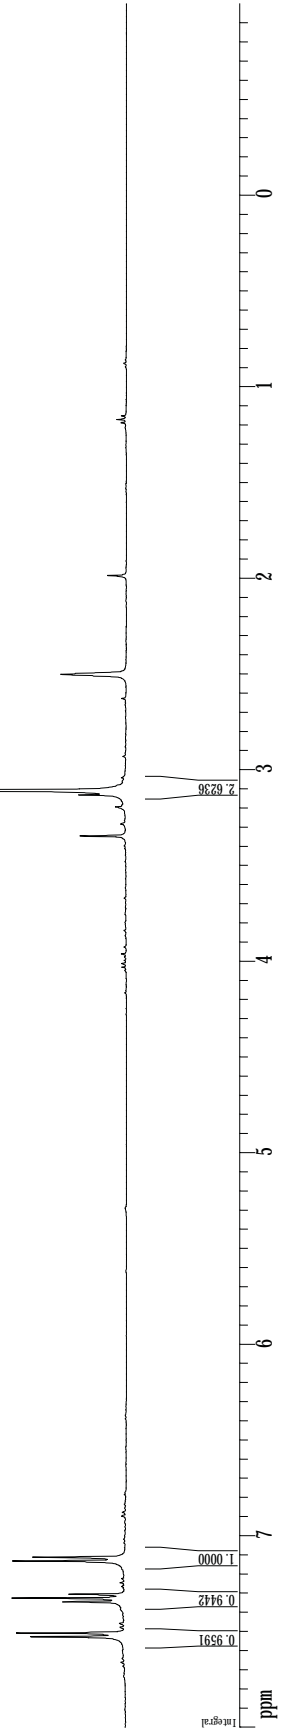

25.84  
38.88  
39.09  
39.30  
39.51  
39.72  
39.93  
40.14

92.82

110.15

118.84

133.66

138.21

153.41

157.58

182.02

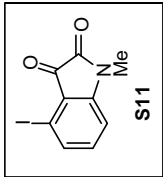

```

Current Data Parameters
USER       Lamer
XNAME      ep-11-258
EXPNO      5
PROCNO     1

F2 - Acquisition Parameters
Date_      20031120
Time       17.22
INSTRUM    drx400
PROBHD     5 mm QNP 1H/
PULPROG    zgpg30
TD         65536
SOLVENT    CDCl3
NS         313
DS         4
SWH         24154.590 Hz
FIDRES     0.388570 Hz
AQ         1.3566452 sec
RG         5160.6
DW         20.700 usec
DE         4.50 usec
TE         300.0 K
D1         0.1000000 sec
D11        0.0300000 sec

===== CHANNEL f1 =====
NUC1       13C
P1         10.12 usec
PL1        0.00 dB
SFO1       100.6257864 MHz

===== CHANNEL f2 =====
CPCPRG2    mltz16
NUC2       1H
P2         90.00 usec
PL2        17.00 dB
PL12       17.90 dB
SFO2       400.1328068 MHz

F2 - Processing parameters
SI         65536
SF         100.6128169 MHz
WDW        EM
SSB        0
LB         1.00 Hz
GB         0
PC         1.00

ID         MR
=====
CV         22.80 cm
CA         11.87 cm
F1P        200.000 ppm
F1         20122.58 Hz
F2P        -5.000 ppm
F2         -503.06 Hz
PPMCM      8.99123 ppm/cm
HZCM       904.63275 Hz/cm
  
```

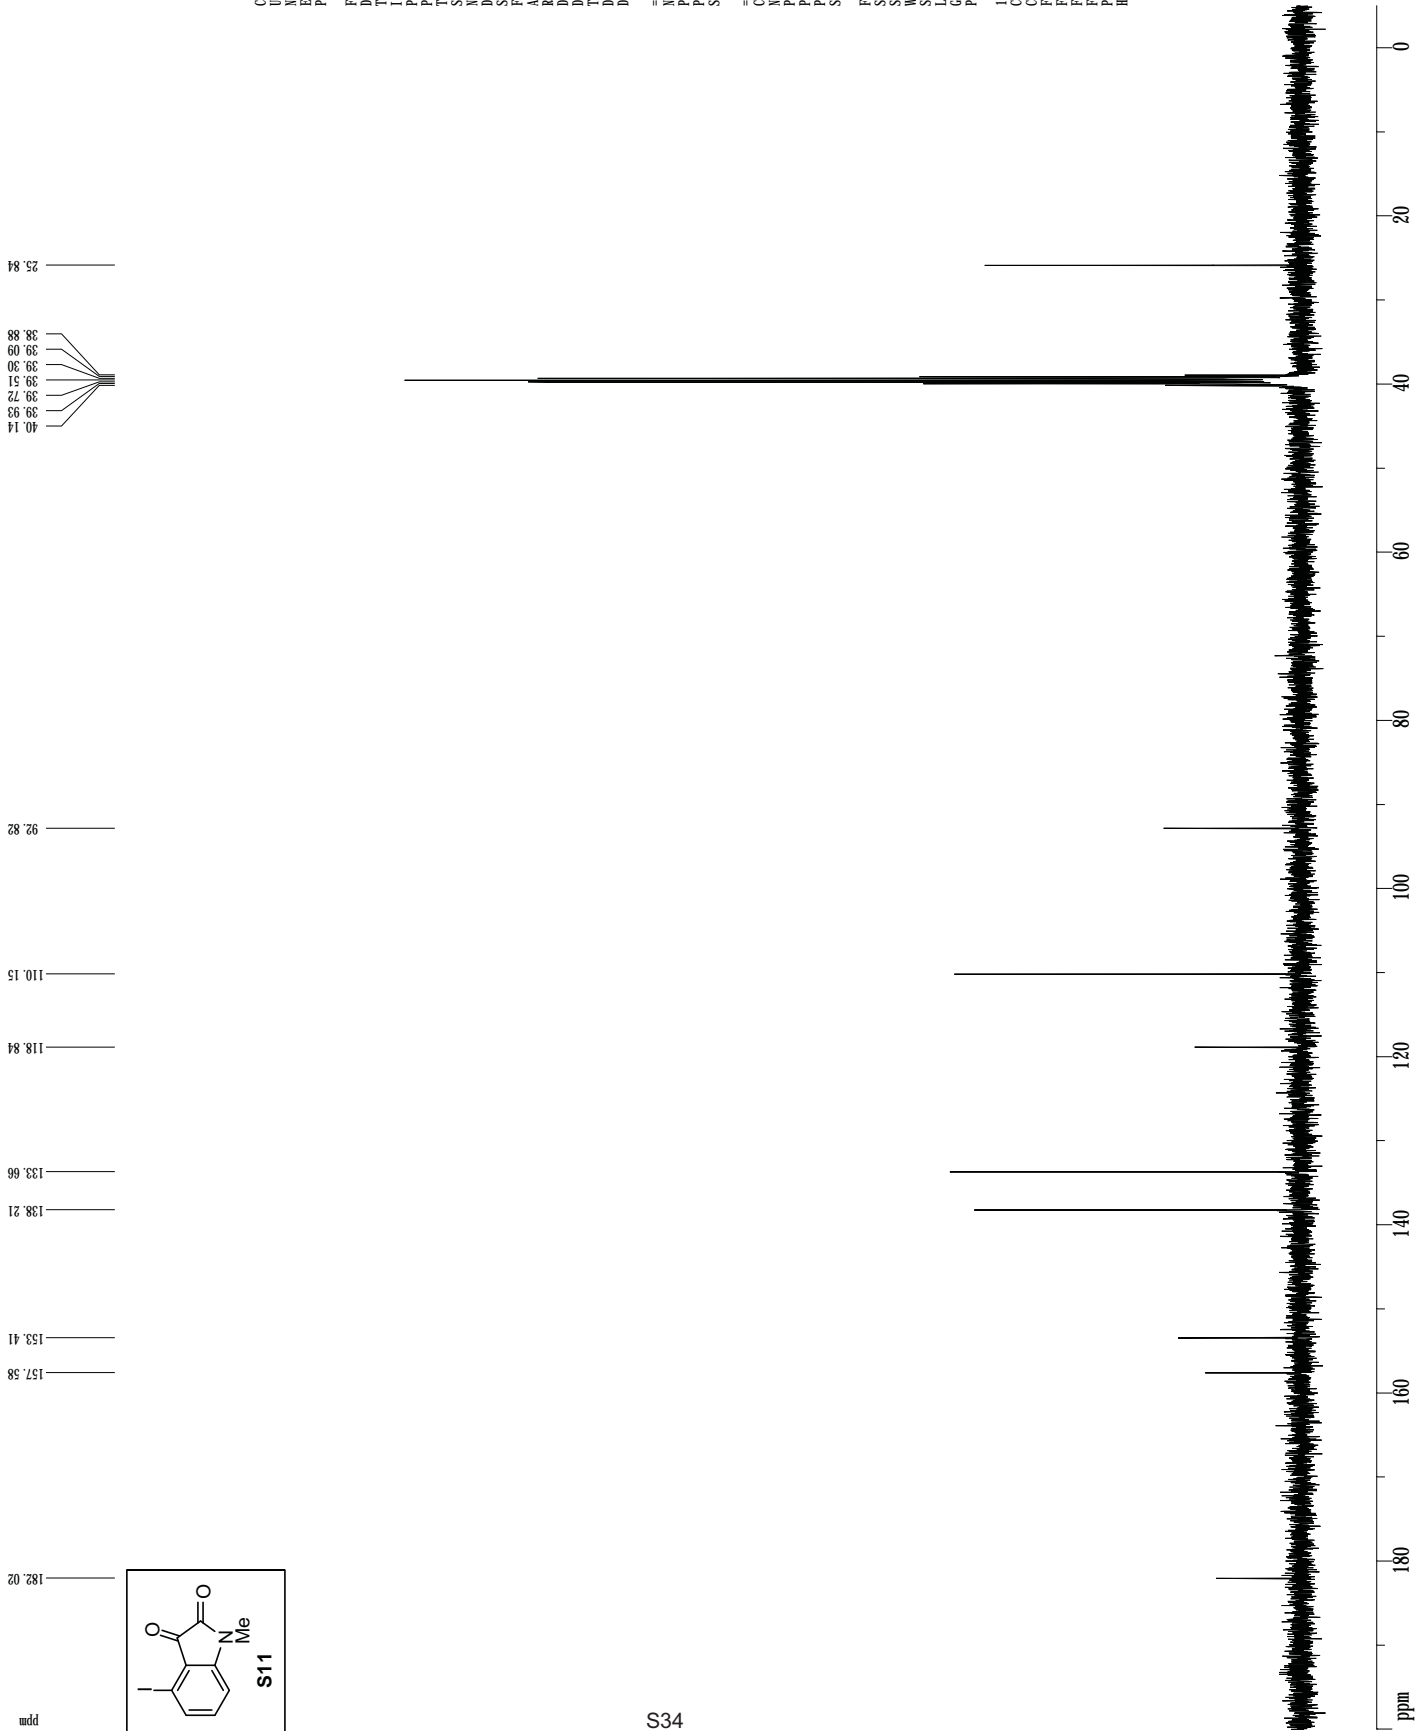

**<sup>1</sup>H spectrum**

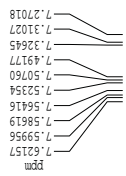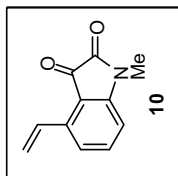

```

Current Data Parameters
USER          tanner
NAME         ht-1-styrenylisatin
EXNO        1
PROCNO      1

F2 - Acquisition Parameters
Date_        20070310
Time         12.40
INSTRUM     crys500
PROBHD      5 mm CPFL1_H-
PULPROG     zgpg30
TD          6550
SOLVENT     CDCl3
NS          2
DS          4
SWH         802.820 Hz
FIDRES     0.098043 Hz
AQ         5.0958774 sec
RG          4.5
DK         62.400 usec
DE         0.000000 usec
TE         298.0 K
D1         0.1000000 sec
d11         0.0000000 sec
d12         0.0000000 sec
d13         0.0150000 sec
===== CHANNEL f1 =====
NUC1         1H
P1          8.00 usec
PL1         1.60 dB
SFO1        500.225015 MHz

F2 - Processing parameters
SI          65536
SF          500.220286 MHz
WDW         EM
SSB         0
LB          0.30 Hz
GB          0
PC          4.00

ID NMR plot parameters
XZ         22.00 cm
YX         22.00 cm
F1P        8.000 ppm
F2P        4001.76 Hz
P1P        -1.000 ppm
P2P        -500.22 Hz
P3P        0.39474 ppm/cm
H2CVM     197.6528 Hz/cm
    
```

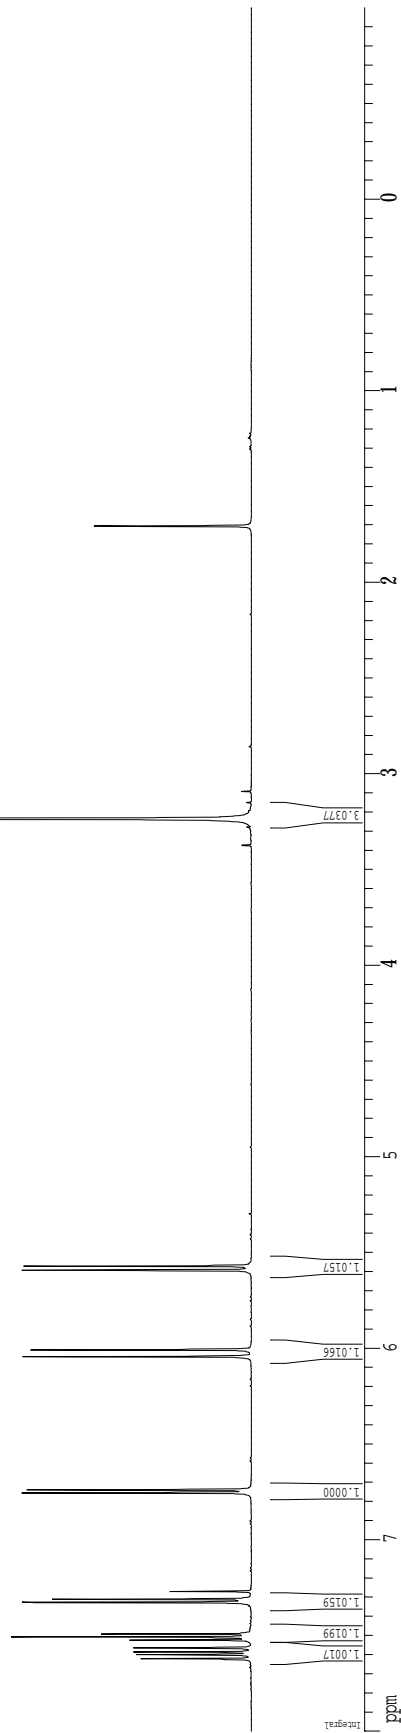



**<sup>13</sup>C spectrum with <sup>1</sup>H decoupling**

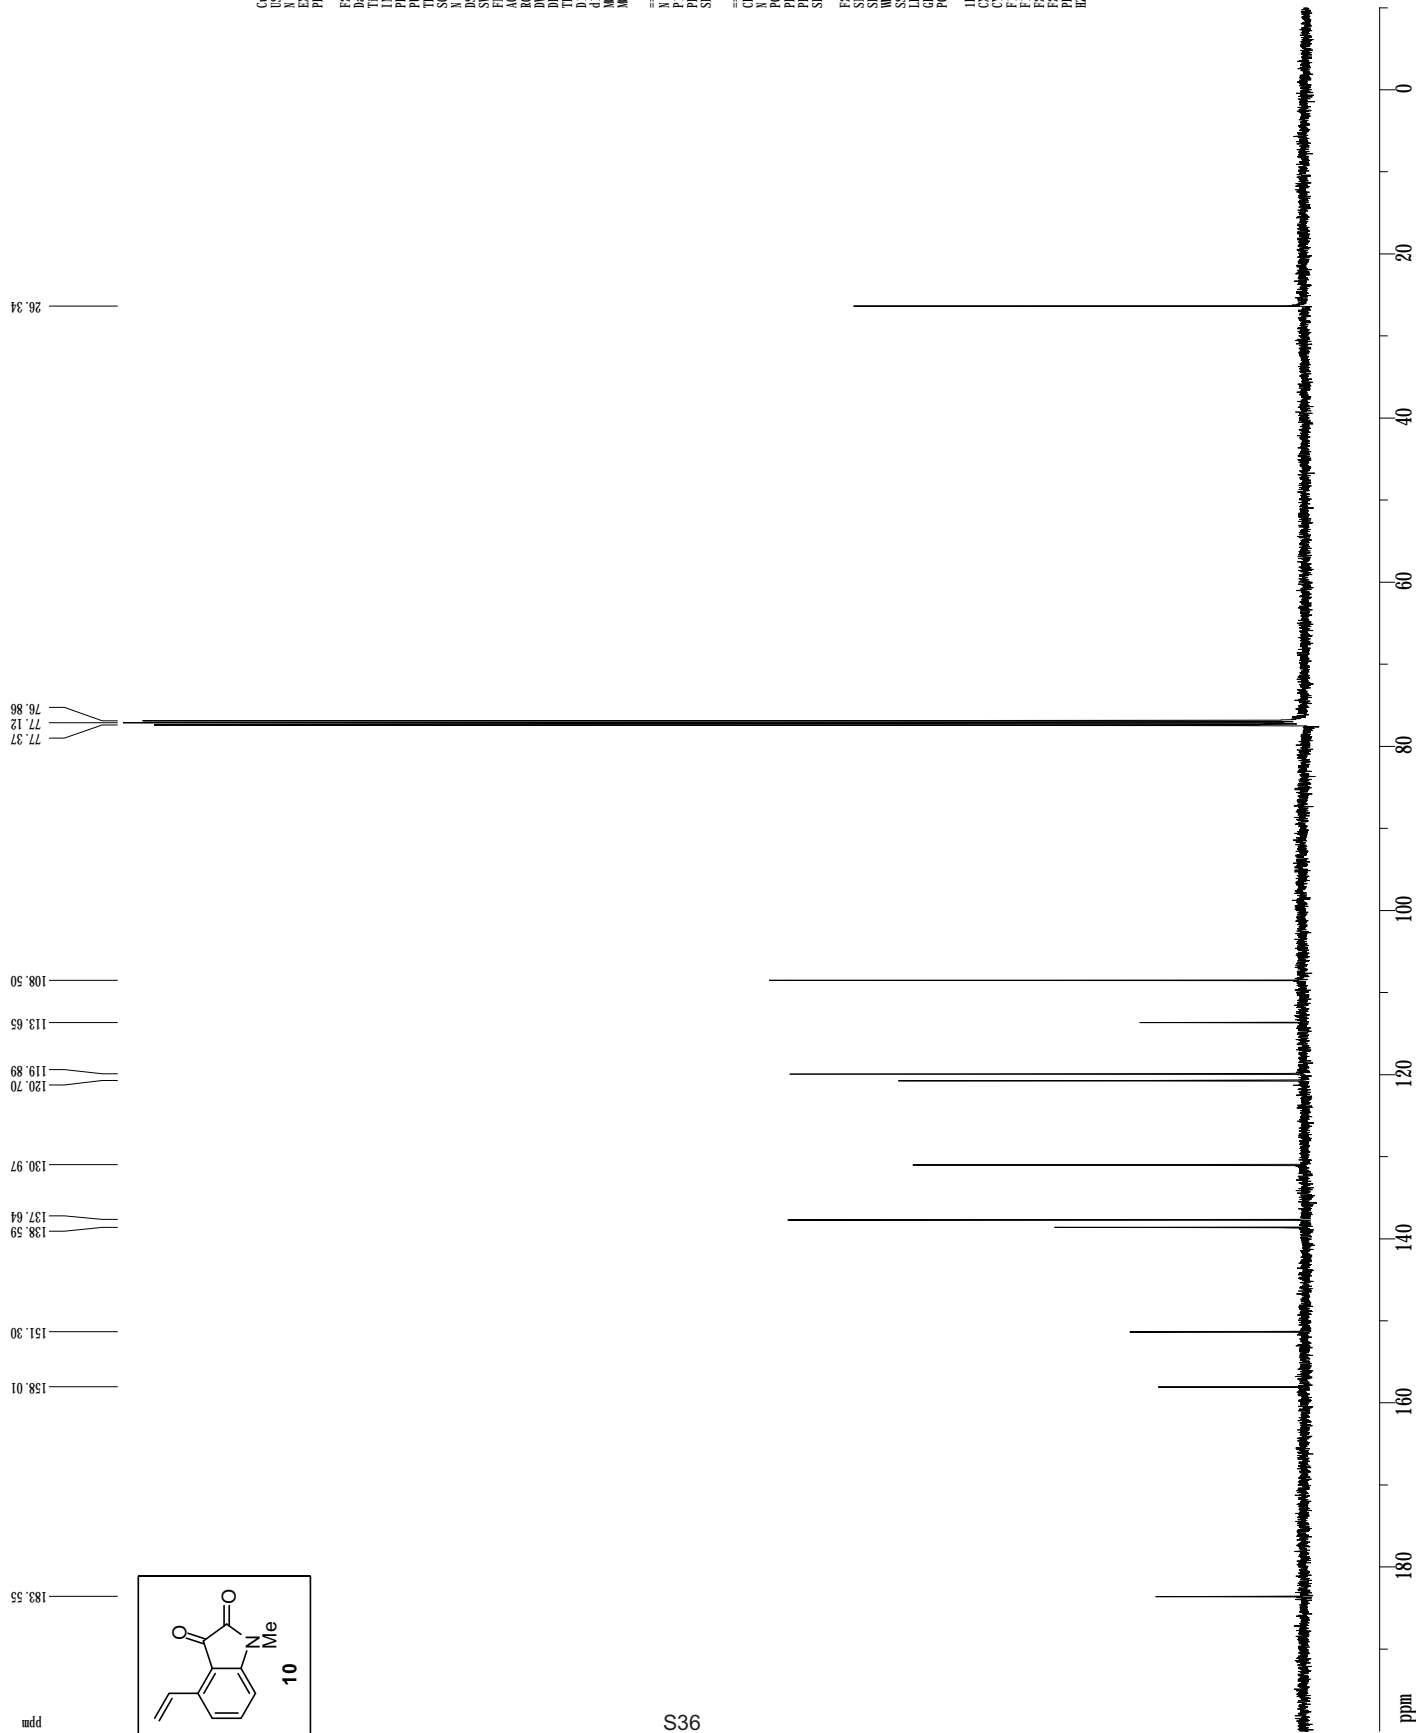

```

Current Data Parameters
=====
USER          tanner
NAME          ht-1-styrylissatin
EXPNO        2
PROCNO       1

F2 - Acquisition Parameters
-----
Date_         20070330
Time_        12.42
INSTRUM      crys500
PROBHD       5 mm CPT1 IH-
PULPROG      zgpg30
TD            65536
AQ            0.941113
RG            103
DS            4
SWH           30803.031 Hz
FIDRES       0.462368 Hz
AQ           1.0813940 sec
RG           8182
AQ            16.500 usec
DE            0.000000 sec
TE           298.0 K
D1            0.2500000 sec
d11           0.0300000 sec
MERST        0.0000000 sec
MCWK         0.0150000 sec

===== CHANNEL f1 =====
NUC1          13C
P1            15.00 usec
PL1           -1.00 dB
SFO1         125.764518 MHz

===== CHANNEL f2 =====
NAME2         waltz16
PCPD2         100.00 usec
PL2           1.60 dB
PL12          23.54 dB
SFO2         500.225011 MHz

F2 - Processing parameters
-----
SI            32768
SF           125.7645180 MHz
WDW           EM
SSB           0
LB            1.00 Hz
GB            0
PC            2.00

ID MR plot parameters
-----
CY           22.80 cm
CX           15.65 cm
FIP          200.000 ppm
F1           25186.08 Hz
F2           -10.000 ppm
F3           -1237.80 Hz
Z1           2.5333333 ppm/cm
Z2           1158.36378 Hz/cm
    
```

<sup>1</sup>H spectrum

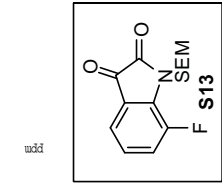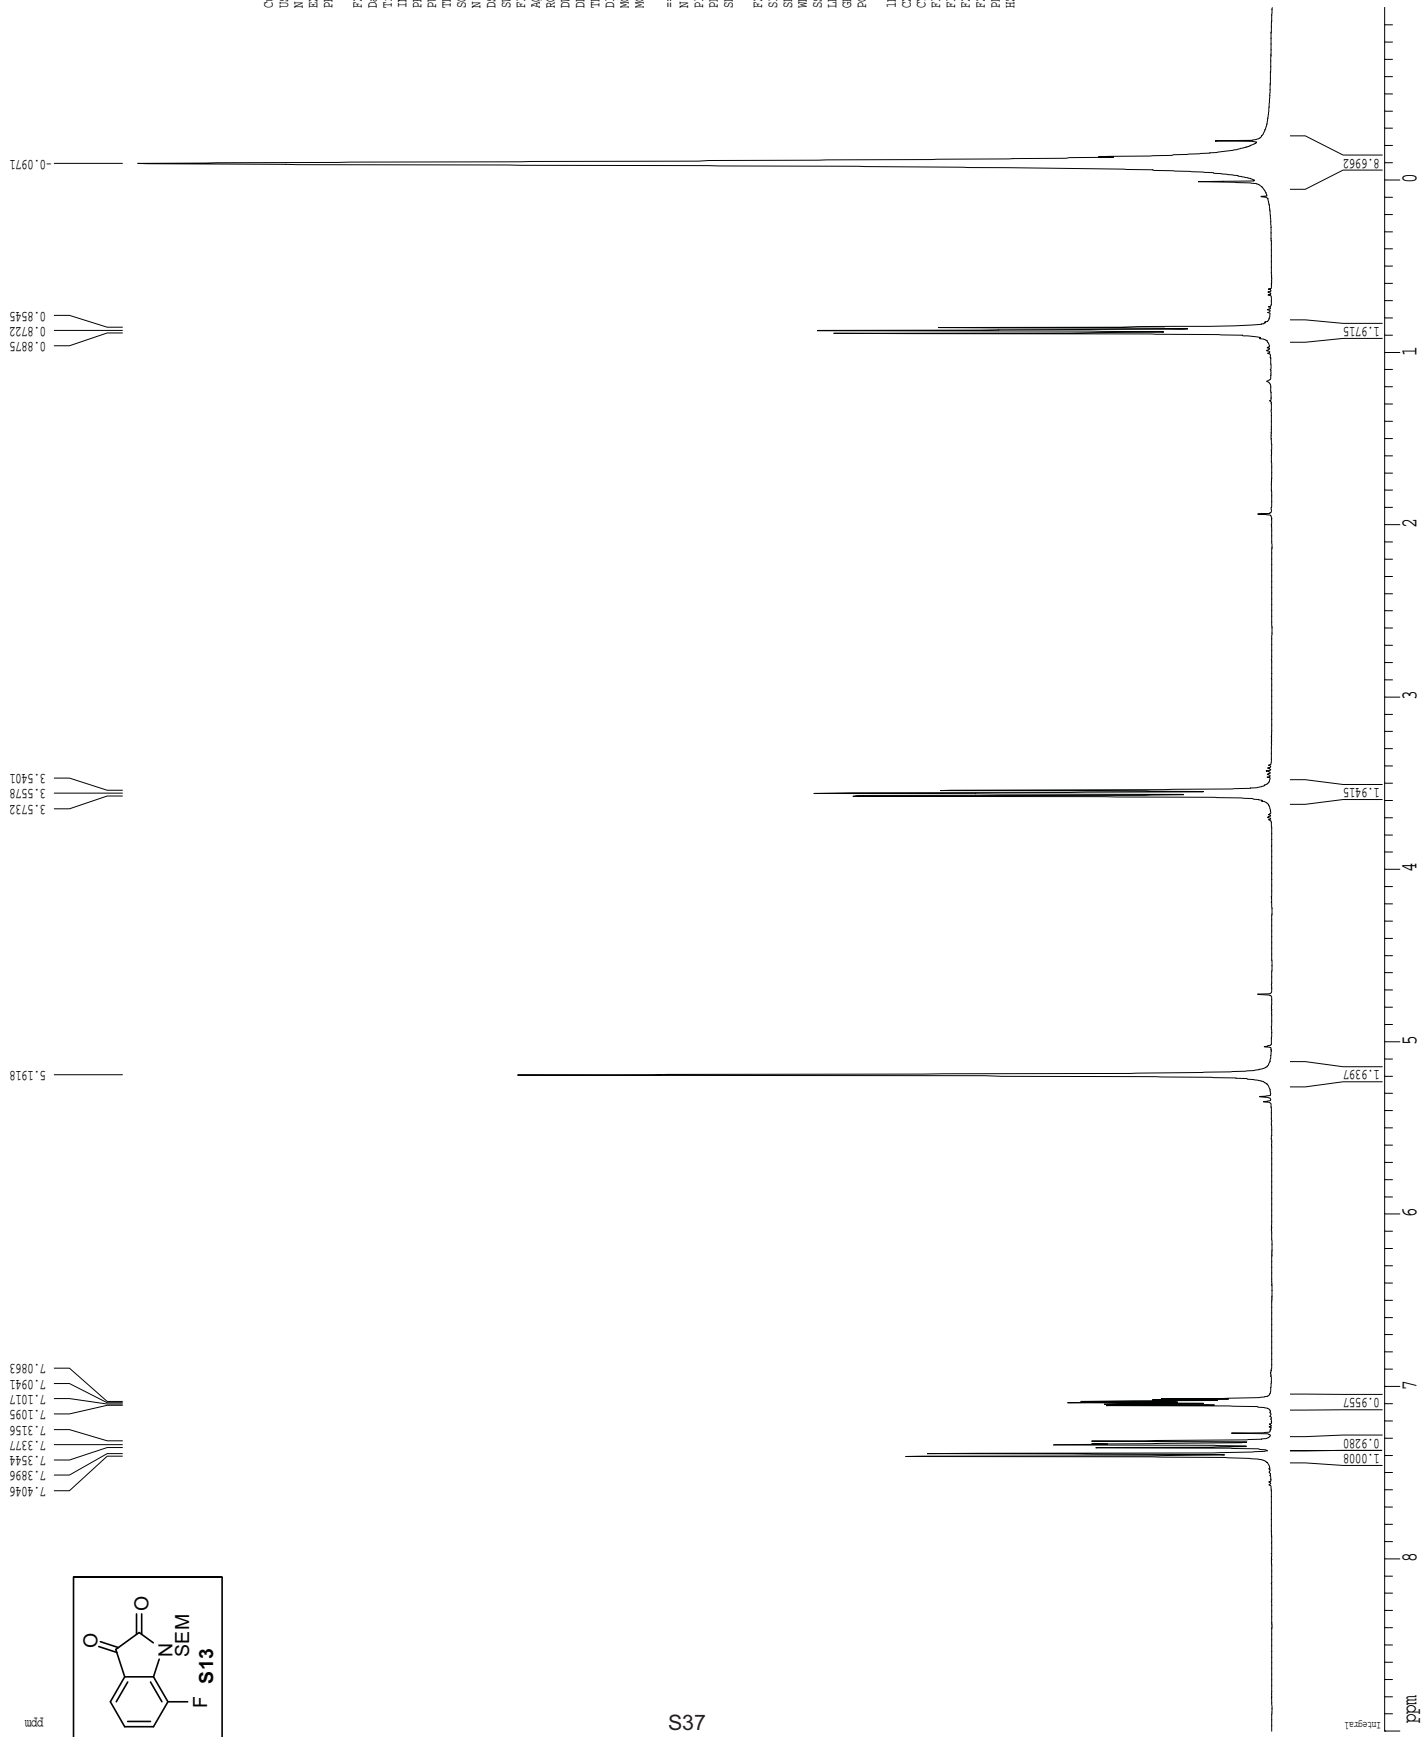

Current Data Parameters  
 USER melis  
 NAME ME 1-68  
 EXPMO 1  
 PROCNO 1

F2 - Acquisition Parameters  
 Date\_ 20071128  
 Time 8:41  
 INSTRUM crys00  
 PPROBHD 5 mm CPXI JH-  
 P1PRG08 8128  
 TO 0  
 SOLVENT CDCl3  
 NS 8  
 DS 2  
 SWH 8012.620 Hz  
 FIDRES 0.098643 Hz  
 AQ 5.098774 sec  
 RG 2.5  
 DW 62.400 usec  
 DE 6.00 usec  
 TE 298.0 K  
 D1 0.1000000 sec  
 ACQRES 0.0000000 sec  
 ACWID 0.0150000 sec

===== CHANNEL f1 =====  
 NUC1 <sup>1</sup>H  
 P1 8.00 usec  
 PL1 1.60 dB  
 SFO1 500.2235015 MHz

F2 - Processing parameters  
 SI 65556  
 SF 500.220250 MHz  
 WDW EM  
 SSB 0  
 GB 0  
 CB 0  
 PC 4.00

ID NMR plot parameters  
 CX 22.80 cm  
 CY 15.00 cm  
 F1P 9.000 ppm  
 F1 4501.98 Hz  
 F2P -1.000 ppm  
 F2 -500.22 Hz  
 PPMCM 0.43860 ppm/cm  
 HZCM 219.39476 Hz/cm

**<sup>13</sup>C spectrum with <sup>1</sup>H decoupling**

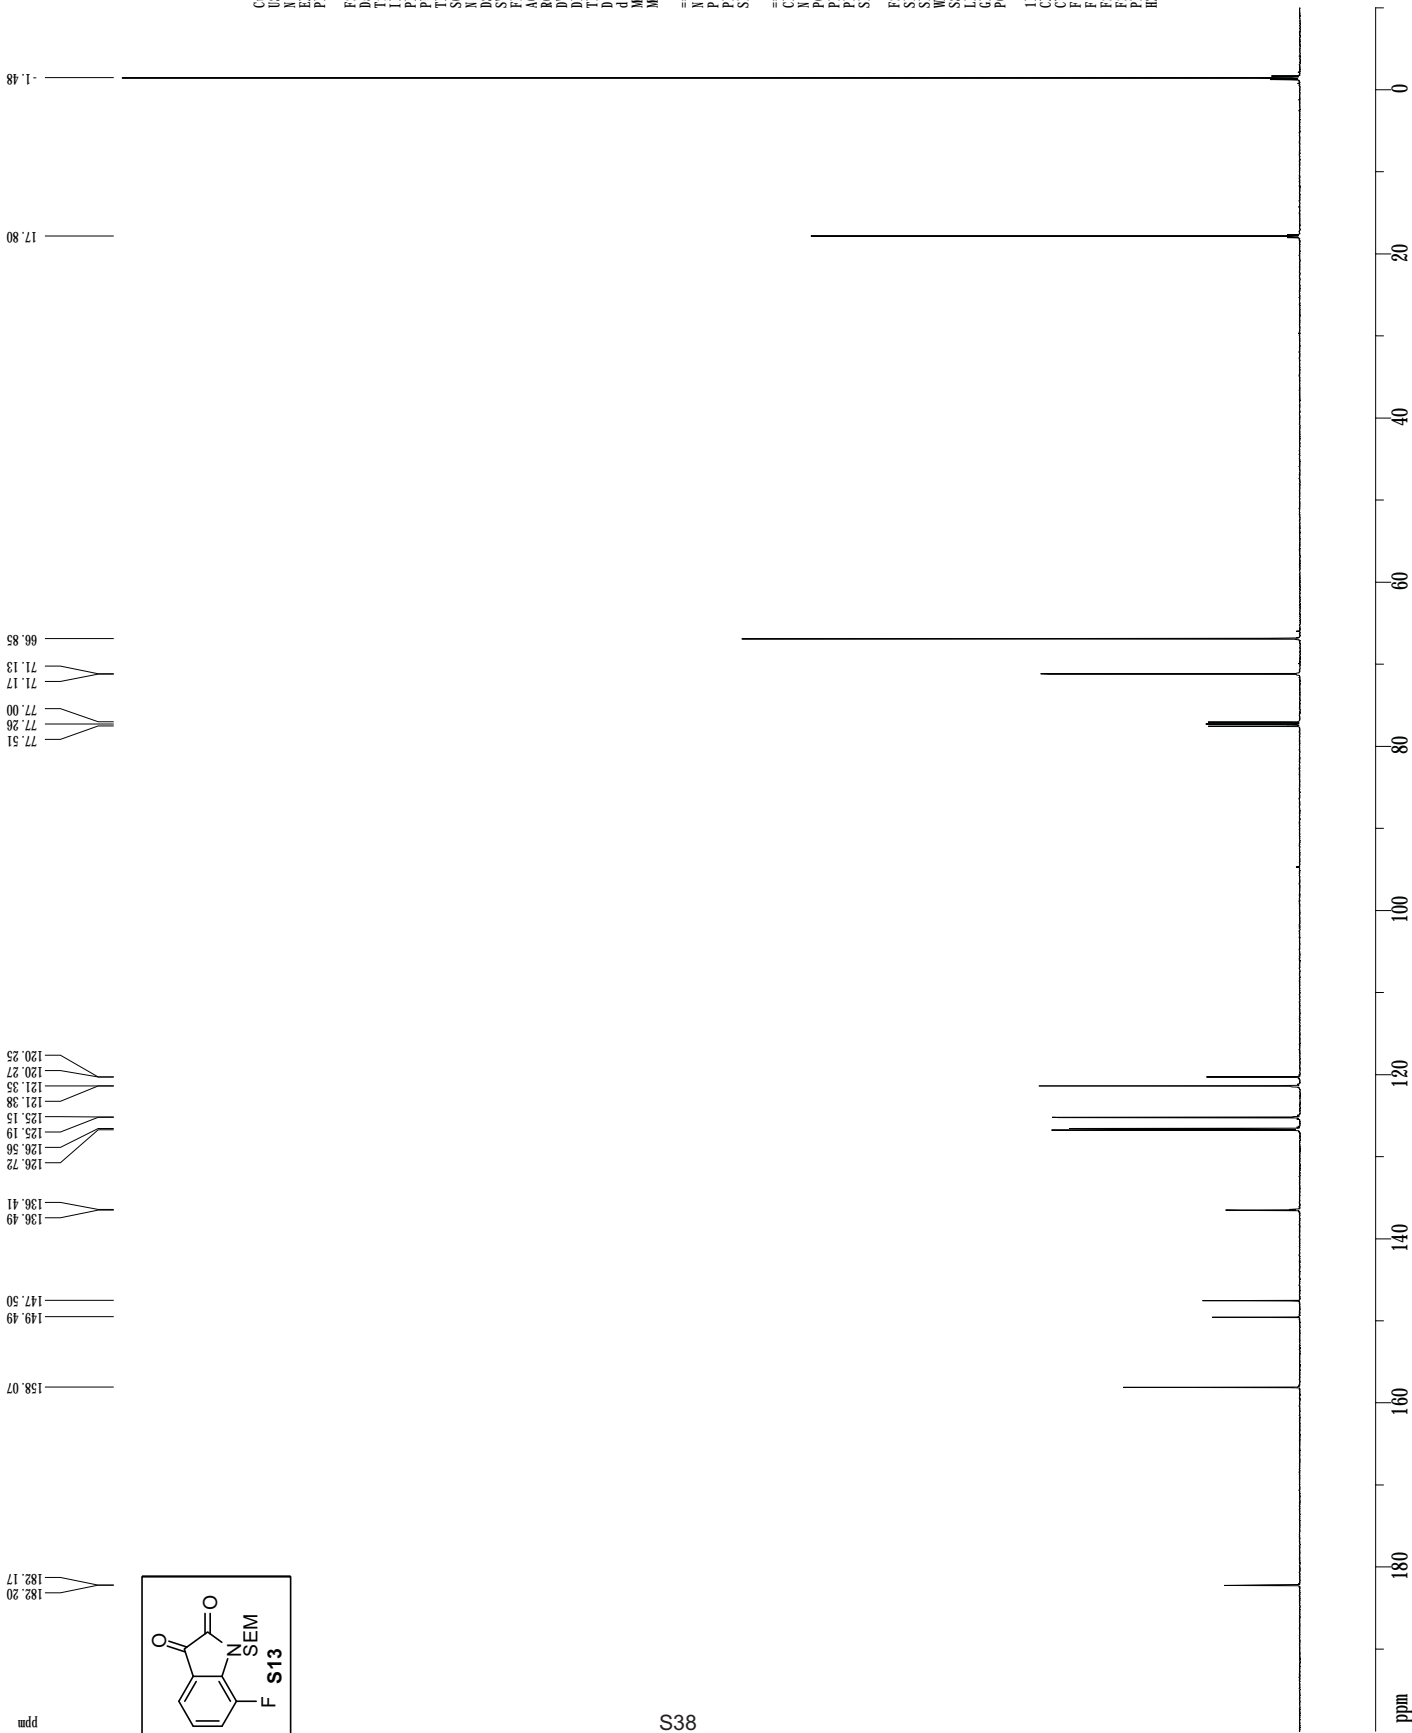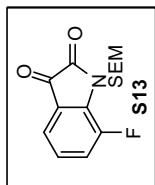

```

Current Data Parameters
USER mel11s
NAME ME 1-68
EXPNO 4
PROCNO 1

F2 - Acquisition Parameters
Date_ 2007128
Time 8.47
INSTRUM cryo500
PROBHD 5 mm CPTCI IH
PULPROG zgpg30
TD 65418
SOLVENT CDCl3
NS 230
DS 4
SWH 30303.031 Hz
FIDRES 0.463222 Hz
AQ 1.079470 sec
RG 7298.2
DW 16.500 usec
DE 6.00 usec
TE 298.0 K
d1 0.2500000 sec
d11 0.0300000 sec
d12 0.0000000 sec
d13 0.0000000 sec
d14 0.0000000 sec
d15 0.0150000 sec
d16 0.0150000 sec
d17 0.0150000 sec
d18 0.0150000 sec
d19 0.0150000 sec
d20 0.0150000 sec
d21 0.0150000 sec
d22 0.0150000 sec
d23 0.0150000 sec
d24 0.0150000 sec
d25 0.0150000 sec
d26 0.0150000 sec
d27 0.0150000 sec
d28 0.0150000 sec
d29 0.0150000 sec
d30 0.0150000 sec
d31 0.0150000 sec
d32 0.0150000 sec
d33 0.0150000 sec
d34 0.0150000 sec
d35 0.0150000 sec
d36 0.0150000 sec
d37 0.0150000 sec
d38 0.0150000 sec
d39 0.0150000 sec
d40 0.0150000 sec
d41 0.0150000 sec
d42 0.0150000 sec
d43 0.0150000 sec
d44 0.0150000 sec
d45 0.0150000 sec
d46 0.0150000 sec
d47 0.0150000 sec
d48 0.0150000 sec
d49 0.0150000 sec
d50 0.0150000 sec
d51 0.0150000 sec
d52 0.0150000 sec
d53 0.0150000 sec
d54 0.0150000 sec
d55 0.0150000 sec
d56 0.0150000 sec
d57 0.0150000 sec
d58 0.0150000 sec
d59 0.0150000 sec
d60 0.0150000 sec
d61 0.0150000 sec
d62 0.0150000 sec
d63 0.0150000 sec
d64 0.0150000 sec
d65 0.0150000 sec
d66 0.0150000 sec
d67 0.0150000 sec
d68 0.0150000 sec
d69 0.0150000 sec
d70 0.0150000 sec
d71 0.0150000 sec
d72 0.0150000 sec
d73 0.0150000 sec
d74 0.0150000 sec
d75 0.0150000 sec
d76 0.0150000 sec
d77 0.0150000 sec
d78 0.0150000 sec
d79 0.0150000 sec
d80 0.0150000 sec
d81 0.0150000 sec
d82 0.0150000 sec
d83 0.0150000 sec
d84 0.0150000 sec
d85 0.0150000 sec
d86 0.0150000 sec
d87 0.0150000 sec
d88 0.0150000 sec
d89 0.0150000 sec
d90 0.0150000 sec
d91 0.0150000 sec
d92 0.0150000 sec
d93 0.0150000 sec
d94 0.0150000 sec
d95 0.0150000 sec
d96 0.0150000 sec
d97 0.0150000 sec
d98 0.0150000 sec
d99 0.0150000 sec
d100 0.0150000 sec
===== CHANNEL f1 =====
NUC1 13C
P1 15.00 usec
PL1 -1.00 dB
SFO1 125.7942546 MHz
===== CHANNEL f2 =====
CPDPRG2 mdd1z16
NUC2 1H
P2 100.00 usec
PL2 1.60 dB
PL12 23.54 dB
SFO2 500.2225011 MHz
F2 - Processing parameters
SI 65536
SF 125.7804190 MHz
WDW EM
SSB 0
LB 1.00 Hz
GB 0
PC 2.00
ID MR plot parameters
CA 22.80 cm
CY 15.65 cm
FIP 200.000 ppm
F1 25156.08 Hz
F2 -10.000 ppm
F2 -1257.80 Hz
PPHM 9.21053 ppm/cm
HZCM 1158.50378 Hz/cm
    
```

1H spectrum

7.47480  
7.45892  
7.39540  
7.39181  
7.38033  
7.36873  
7.34011  
7.33011  
7.32473  
7.27000  
7.26530  
7.26243  
7.24939  
7.24652  
6.96395  
6.96395  
6.96395

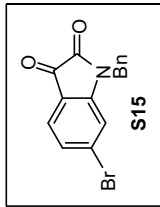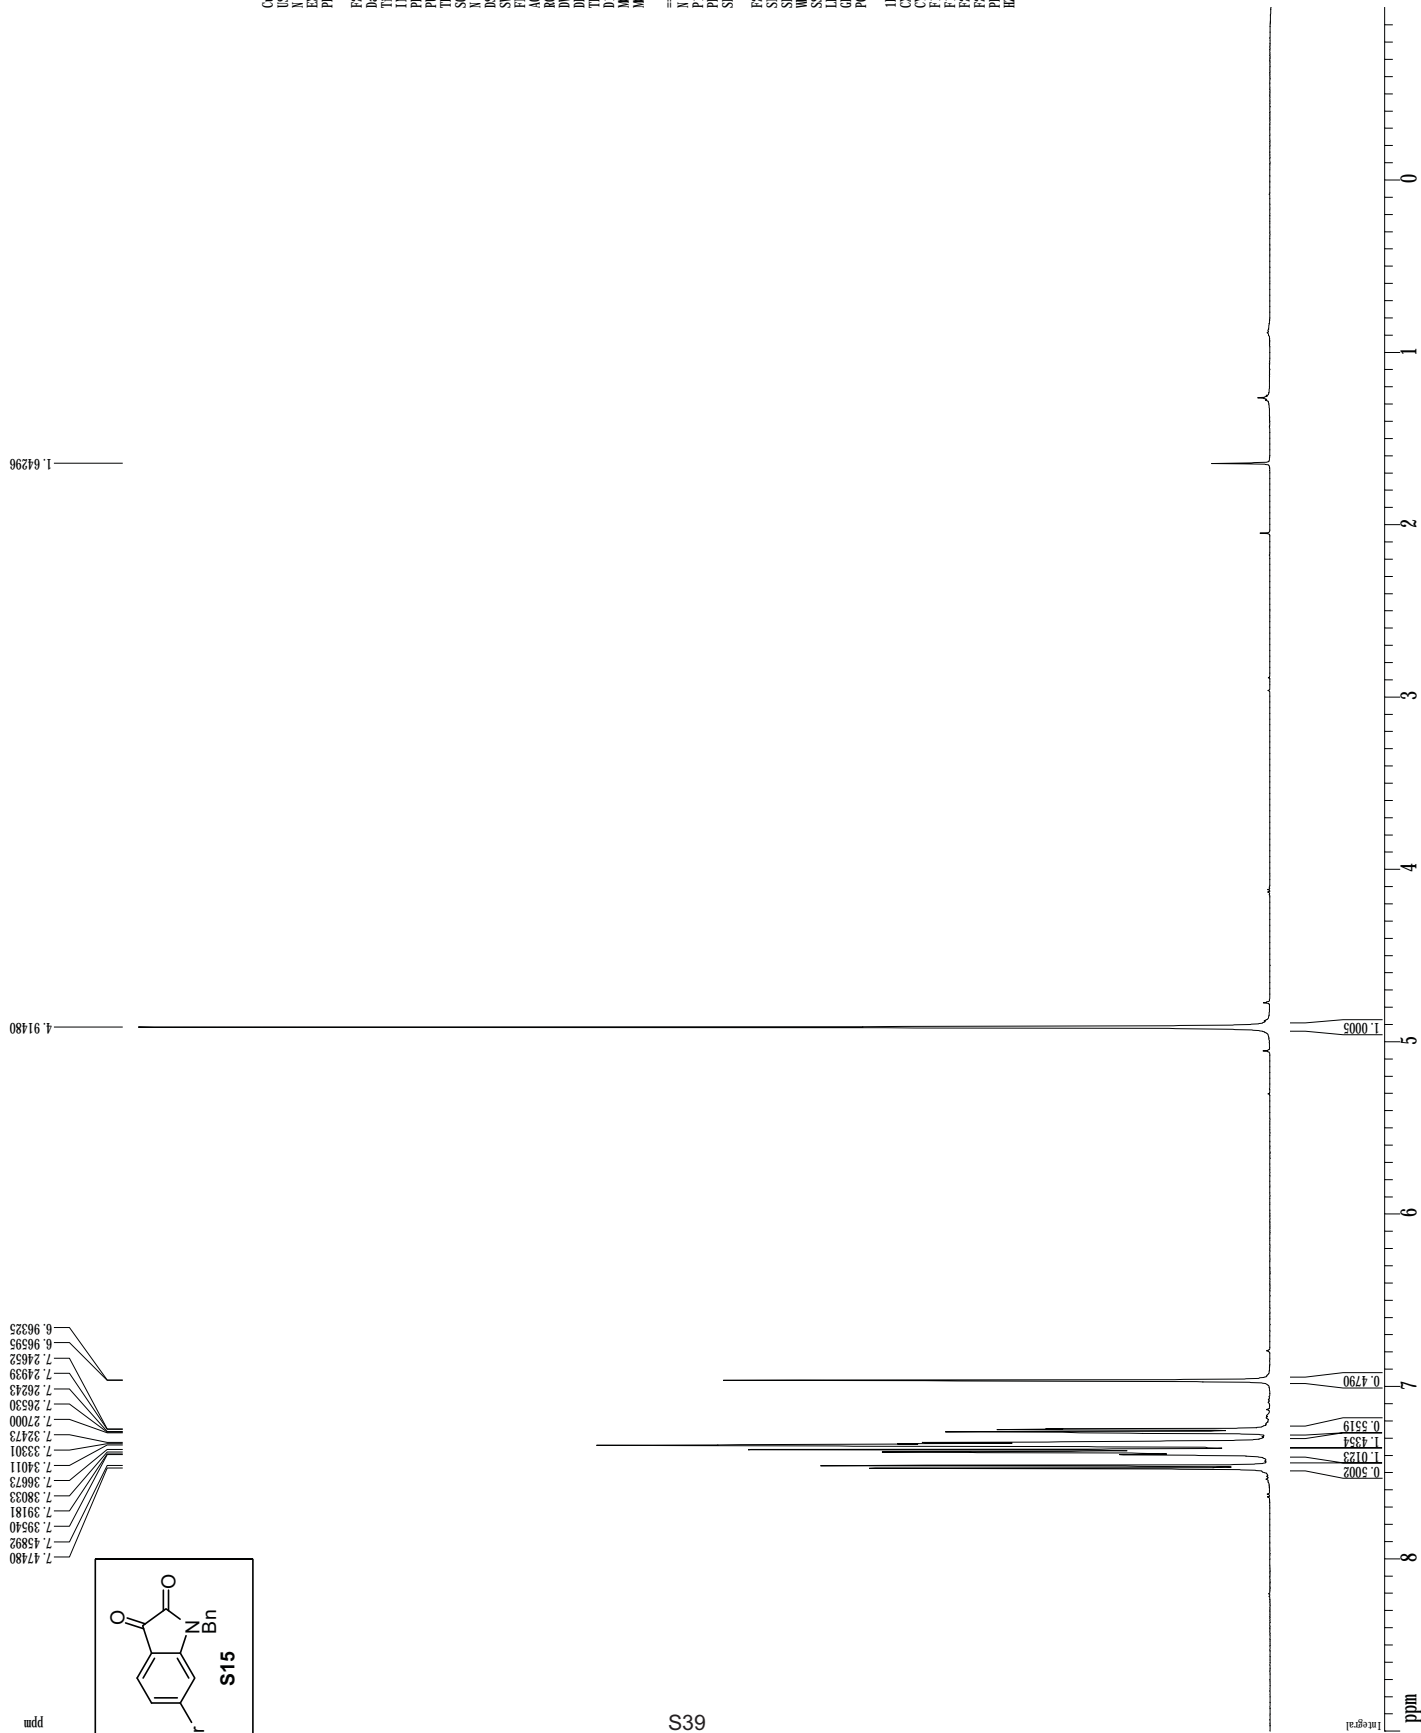

Current Data Parameters  
 USER mel11s  
 NAME ME1-94-ch  
 EXPNO 1  
 PROCNO 1

F2 - Acquisition Parameters  
 Date\_ 20080119  
 Time 15.13  
 INSTRUM cryo000  
 PULPROG zgpg30  
 TD 65536  
 SOLVENT CDCl3  
 NS 8  
 DS 2  
 SWH 8012.820 Hz  
 FIDRES 0.098043 Hz  
 AQ 5.0989774 sec  
 RG 8  
 DW 62.400 usec  
 DE 6.00 usec  
 TE 298.0 K  
 APROG 0.1000000 sec  
 MPROG 0.1000000 sec

==== CHANNEL f1 =====  
 NUC1 1H  
 P1 8.00 usec  
 PL1 1.60 dB  
 SF01 500.225015 MHz

F2 - Processing parameters  
 SI 65536  
 SF 500.220025 MHz  
 MDW EM  
 ASB 0 Hz  
 GB 0  
 PC 4.00

ID MR plot parameters  
 CX 22.80 cm  
 CY 15.00 cm  
 FIP 9.000 ppm  
 FI 4501.98 Hz  
 F2P -1.000 ppm  
 F2 -500.22 Hz  
 PPMCM 0.43860 ppm/cm  
 HZCM 219.39476 Hz/cm

13C spectrum with 1H decoupling

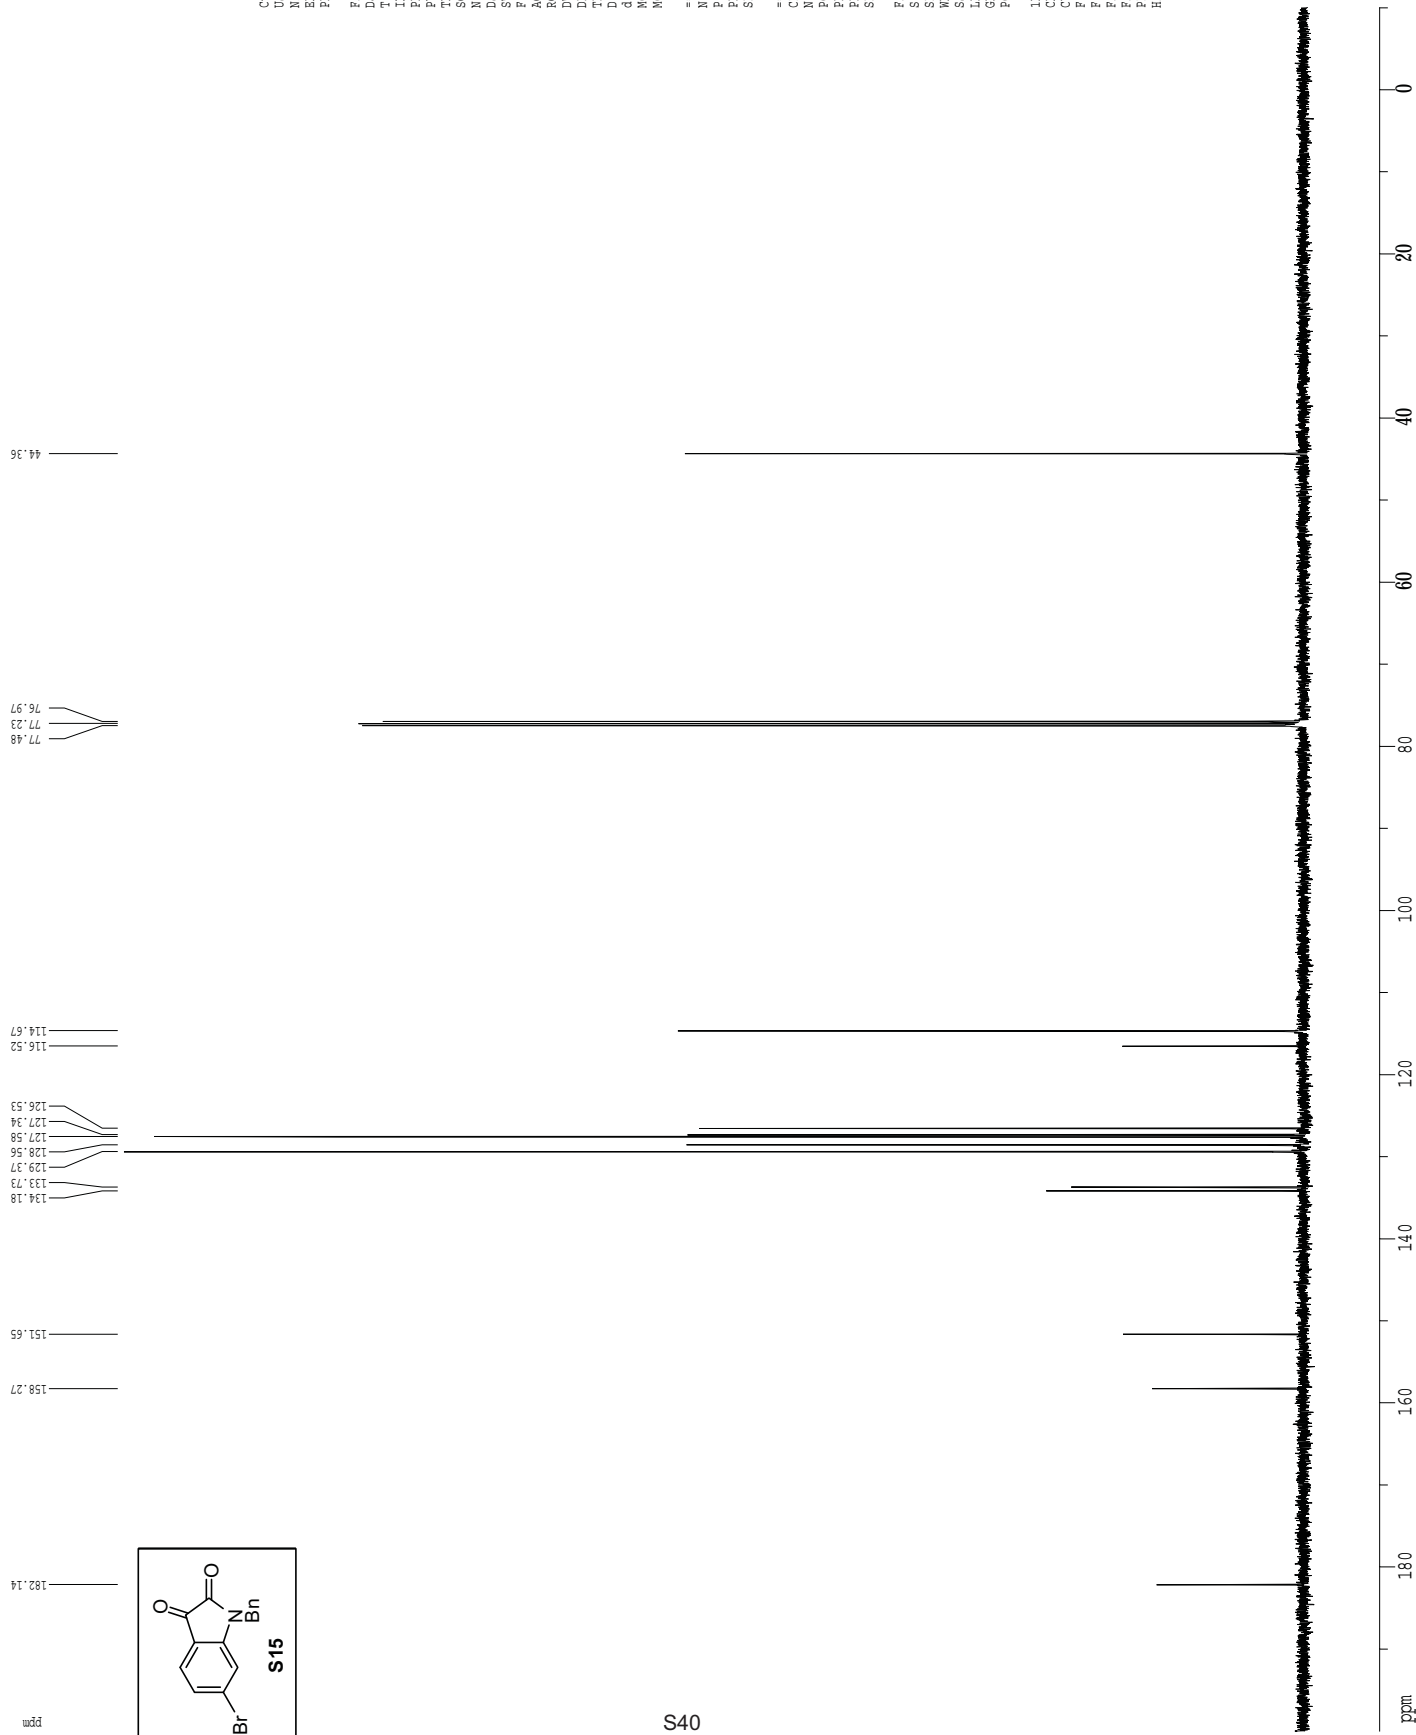

```

Current Data Parameters
USER      mellis
NAME      ME I-94-ch
EXWNO     3
PROCNO    1

F2 - Acquisition Parameters
Date_     20080119
Time      15.16
INSTRUM   cryo500
PROBHD    5 mm CPTCI 1H-
PULPROG   zgpg30
TD         65418
SOLVENT    CDCl3
NS         82
DS         4
SFO        30303.031 Hz
RG         0.463222 Hz
AQ         1.0794470 sec
RG         11585.2
DW         16.500 usec
DE         6.00 usec
TE         298.0 K
D1         0.25000000 sec
d11        0.03000000 sec
MCREST     0.00000000 sec
MORREST    0.01500000 sec

===== CHANNEL F1 =====
NUC1       13C
P1         15.00 usec
PL1        -1.00 dB
SFO1       125.7942548 MHz

===== CHANNEL F2 =====
CPDPRG2    waltz16
NUC2        1H
PCPD2      100.00 usec
PL2         1.60 dB
PL12       23.54 dB
SFO2       500.2225011 MHz

F2 - Processing parameters
SI         65536
SF         125.7804048 MHz
WDW        EM
SSB        0
LB         1.00 Hz
GB         0
PC         2.00

1D NMR plot parameters
AQ         12.80 cm
CT         15.80 cm
F1P        200.000 ppm
F1         25156.08 Hz
F2P        -10.000 ppm
F2         -1257.80 Hz
PRNCM      9.21053 ppm/cm
HZCM       1188.50366 Hz/cm
    
```

ME 1-6/  
1H spectrum

ppm  
7.6787  
7.6683  
7.4964  
7.4814  
7.4514  
7.4612  
7.4311  
7.4213  
7.3583  
7.3701  
7.3796  
7.3145  
7.3147  
7.3031  
7.2864  
7.2707  
6.9789

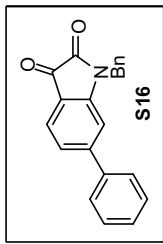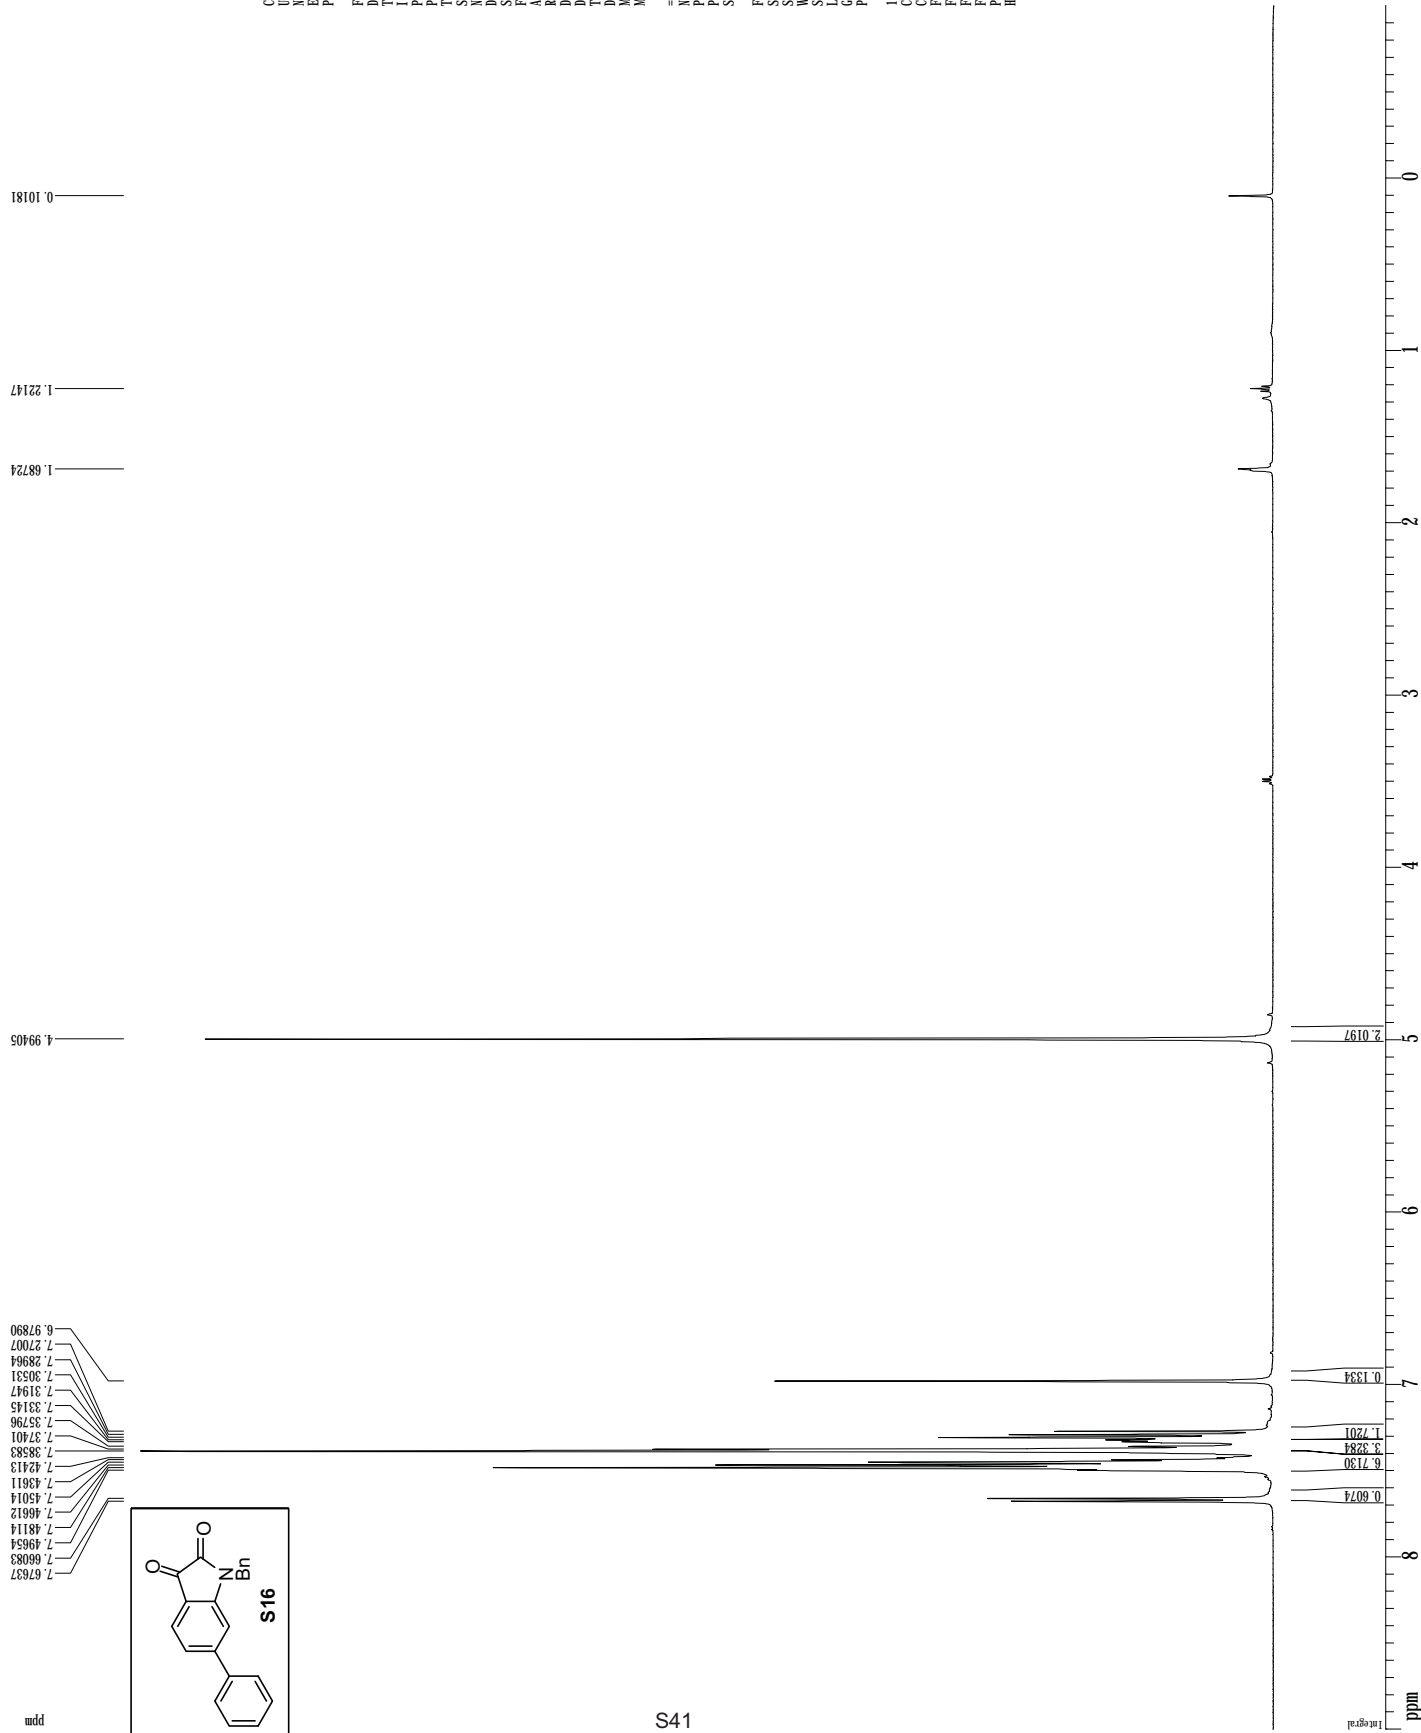

Current Data Parameters  
 USER ME 1-97-char  
 EXPNO 1  
 PROCNO 1

F2 - Acquisition Parameters  
 Date\_ 20080111  
 Time 15:33  
 INSTRUM spect  
 PROBHD 5 mm broad  
 PULPROG zgpg30  
 TD 81728  
 SOLVENT CDCl3  
 NS 8  
 DS 2  
 SWH 8012.821 Hz  
 FIDRES 0.09843 Hz  
 AQ 5.069574 sec  
 RG 90.3  
 DW 62.400 usec  
 DE 6.00 usec  
 TE 300.2 K  
 D1 0.1000000 sec  
 D2 0.0000000 sec  
 MRESST 0.0000000 sec  
 MRWAK 0.0150000 sec

==== CHANNEL f1 =====  
 NUC1 1H  
 P1 12.00 usec  
 PL1 -3.00 dB  
 SFO1 499.8244868 MHz

F2 - Processing parameters  
 SI 6539  
 SF 499.8250250 MHz  
 WDW EM  
 SSB 0  
 LB 0.30 Hz  
 GB 0  
 PC 4.00

ID MR plot parameters  
 CX 22.80 cm  
 CY 15.00 cm  
 FIP 9.000 ppm  
 FI 4498.43 Hz  
 F2P -1.000 ppm  
 FZ 0.43860 ppm/cm  
 MZC1 219.22150 Hz/cm

<sup>13</sup>C spectrum with <sup>1</sup>H decoupling

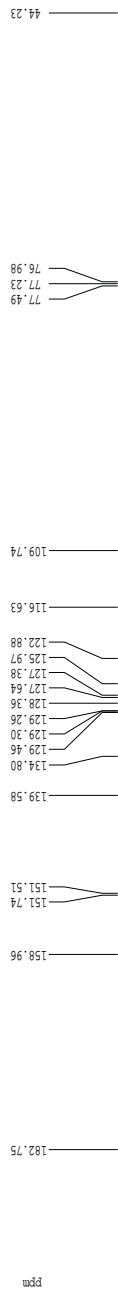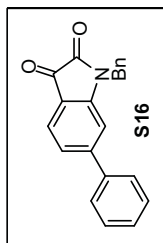

```

Current Data Parameters
USER      mellis
NAME      ME I-97-char
EXWNO     2
PROCNO    1

F2 - Acquisition Parameters
Date_     20080111
Time      15.55
INSTRUM   gm500
PROBHD    5 mm broadband
PULPROG   zgpg30
TD         65536
SOLVENT   CDCl3
NS         200
DS         4
SFO1      30303.031 Hz
FIDRES    0.462388 Hz
AQ         1.0813846 sec
RG         3253
DM         16.500 usec
DE         4.50 usec
TE         298.0 K
D1         0.25000000 sec
d11        0.03000000 sec
MCREST    0.00000000 sec
MCREK      0.01500000 sec

===== CHANNEL F1 =====
NUC1       13C
P1         7.08 usec
PL1        0.00 dB
SFO1      125.694209 MHz

===== CHANNEL F2 =====
CPDPRG2   waltz16
NUC2       1H
PCPD2      80.00 usec
PL2        -1.00 dB
PL12       14.70 dB
SFO2      499.8774991 MHz

F2 - Processing parameters
SI         65536
SF         125.6810831 MHz
WDW        EM
SSB        0
LB         1.00 Hz
GB         0
PC         2.00

ID MRB plot parameters
AQ         22.80 cm
CX         15.68 cm
CY         15.68 cm
FIDP       200.000 ppm
F1         25136.23 Hz
F2P        -10.000 ppm
F2         -1256.83 Hz
PRMCM      9.21053 ppm/cm
HZCM       1157.58887 Hz/cm
    
```

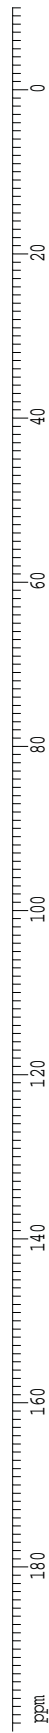

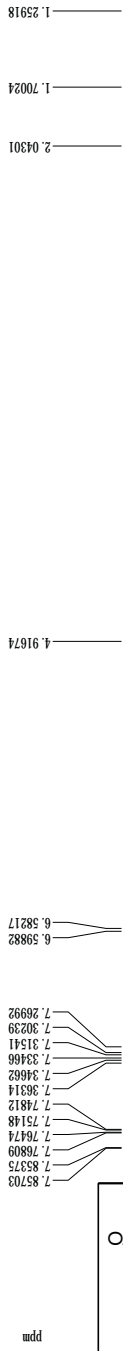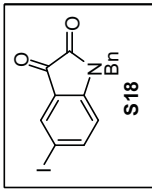

Current Data Parameters  
 USER mel11s  
 NAME ME-1-117  
 EXPNO 1  
 PROCNO 1

F2 - Acquisition Parameters  
 Date\_ 20060108  
 Time 15:05  
 INSTRUM cryo600  
 PROBRD 5 mm CPTCI 1H  
 PULPROG zg30  
 TD 81728  
 SOLVENT CDCl3  
 NS 8  
 DS 2  
 SWH 8012.820 Hz  
 FIDRES 0.09843 Hz  
 AQ 5.089874 sec  
 RG 6.3  
 DW 62.400 usec  
 DE 2.000 usec  
 TE 298.2 K  
 DI 0.1000000 sec  
 MREST 0.0000000 sec  
 MCWK 0.0150000 sec

===== CHANNEL f1 =====  
 NUC1 1H  
 P1 8.00 usec  
 PL1 1.60 dB  
 SFO1 500.2253015 MHz

F2 - Processing parameters  
 SI 65536  
 SF 500.2260527 MHz  
 NW 500.2260527 MHz  
 FWH 0  
 SSB 0  
 LB 0.30 Hz  
 GB 0  
 PC 4.00

ID MR plot parameters  
 CX 22.80 cm  
 CY 15.00 cm  
 FIP 9.000 ppm  
 FI 4501.98 Hz  
 F2 500.2260527 MHz  
 F3 500.2260527 MHz  
 PPM1 0.43860 ppm/cm  
 PPM2 219.39476 Hz/cm

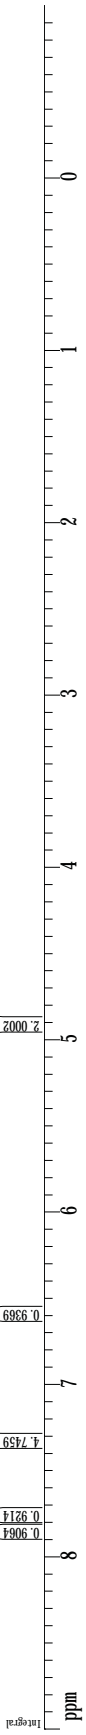



**<sup>13</sup>C spectrum with <sup>1</sup>H decoupling**

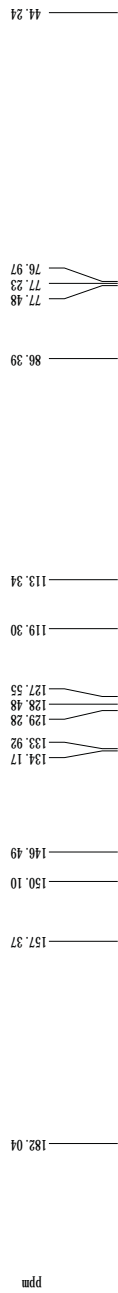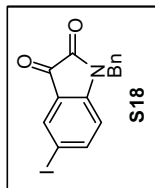

```

Current Data Parameters
USER mel11s
NAME ME1-117
EXPNO 3
PROCNO 1

F2 - Acquisition Parameters
Date_ 20080119
Time 15.08
INSTRUM cryo500
PROBHD 5 mm CPTCI IH
PULPROG zgpg30
TD 65418
SOLVENT CDCl3
NS 110
DS 4
SWH 30303.031 Hz
FIDRES 0.463222 Hz
AQ 1.079470 sec
RG 11585.2
DW 16.500 usec
DE 6.00 usec
TE 298.0 K
d1 0.2500000 sec
d11 0.0300000 sec
d12 0.0000000 sec
d13 0.0000000 sec
d14 0.0150000 sec
d15 0.0000000 sec
d16 0.0000000 sec
d17 0.0000000 sec
d18 0.0000000 sec
d19 0.0000000 sec
d20 0.0000000 sec
d21 0.0000000 sec
d22 0.0000000 sec
d23 0.0000000 sec
d24 0.0000000 sec
d25 0.0000000 sec
d26 0.0000000 sec
d27 0.0000000 sec
d28 0.0000000 sec
d29 0.0000000 sec
d30 0.0000000 sec
d31 0.0000000 sec
d32 0.0000000 sec
d33 0.0000000 sec
d34 0.0000000 sec
d35 0.0000000 sec
d36 0.0000000 sec
d37 0.0000000 sec
d38 0.0000000 sec
d39 0.0000000 sec
d40 0.0000000 sec
d41 0.0000000 sec
d42 0.0000000 sec
d43 0.0000000 sec
d44 0.0000000 sec
d45 0.0000000 sec
d46 0.0000000 sec
d47 0.0000000 sec
d48 0.0000000 sec
d49 0.0000000 sec
d50 0.0000000 sec
d51 0.0000000 sec
d52 0.0000000 sec
d53 0.0000000 sec
d54 0.0000000 sec
d55 0.0000000 sec
d56 0.0000000 sec
d57 0.0000000 sec
d58 0.0000000 sec
d59 0.0000000 sec
d60 0.0000000 sec
d61 0.0000000 sec
d62 0.0000000 sec
d63 0.0000000 sec
d64 0.0000000 sec
d65 0.0000000 sec
d66 0.0000000 sec
d67 0.0000000 sec
d68 0.0000000 sec
d69 0.0000000 sec
d70 0.0000000 sec
d71 0.0000000 sec
d72 0.0000000 sec
d73 0.0000000 sec
d74 0.0000000 sec
d75 0.0000000 sec
d76 0.0000000 sec
d77 0.0000000 sec
d78 0.0000000 sec
d79 0.0000000 sec
d80 0.0000000 sec
d81 0.0000000 sec
d82 0.0000000 sec
d83 0.0000000 sec
d84 0.0000000 sec
d85 0.0000000 sec
d86 0.0000000 sec
d87 0.0000000 sec
d88 0.0000000 sec
d89 0.0000000 sec
d90 0.0000000 sec
d91 0.0000000 sec
d92 0.0000000 sec
d93 0.0000000 sec
d94 0.0000000 sec
d95 0.0000000 sec
d96 0.0000000 sec
d97 0.0000000 sec
d98 0.0000000 sec
d99 0.0000000 sec
d100 0.0000000 sec
===== CHANNEL f1 =====
NUC1 13C
P1 15.00 usec
PL1 -1.00 dB
SFO1 125.7942546 MHz
===== CHANNEL f2 =====
CPDPRG2 mvd1z16
NUC2 1H
P2 100.00 usec
PL2 1.60 dB
PL12 23.54 dB
SFO2 500.2225011 MHz
F2 - Processing parameters
SI 65536
SF 125.7804103 MHz
WDW EM
SSB 0
LB 1.00 Hz
GB 0
PC 2.00
ID MR plot parameters
CA 22.80 cm
CY 15.65 cm
FIP 200.000 ppm
F1 25156.08 Hz
F2 -10.000 ppm
F2P -1257.80 Hz
PPHM 9.21053 ppm/cm
HZCM 1158.50378 Hz/cm
    
```

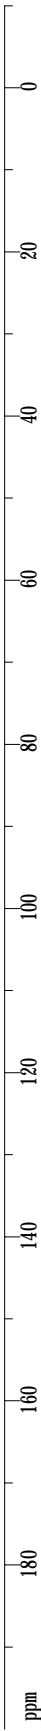

**<sup>1</sup>H spectrum**

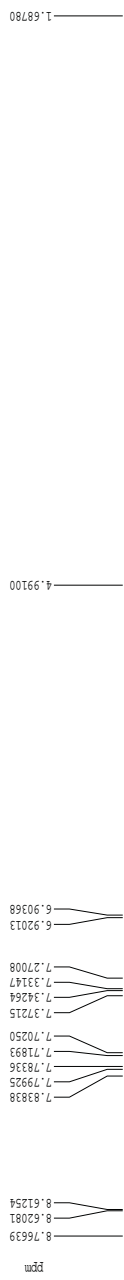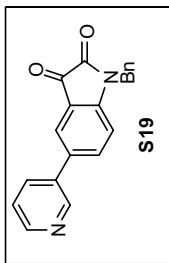

Current Data Parameters  
 USER melis  
 NAME ME I-93-ch  
 EXPNO 1  
 PROCNO 1

F2 - Acquisition Parameters  
 Date\_ 20080121  
 Time 8.44  
 INSTRUM gms00  
 PULPROG 5 mm broadband  
 TD 65536  
 SFO1 499.8284988 MHz  
 SOLVENT CDCl3  
 NS 8  
 DS 2  
 SWH 8012.620 Hz  
 FIDRES 0.098643 Hz  
 AQ 5.0398774 sec  
 RG 812.7  
 DW 62.400 usec  
 DE 6.00 usec  
 TE 298.0 K  
 D1 0.1000000 sec  
 ACQRES 0.0000000 sec  
 PCYCLE 0.0150000 sec

===== CHANNEL f1 =====  
 NUC1 <sup>1</sup>H  
 P1 12.00 usec  
 PL1 -3.00 dB  
 SFO1 499.8284988 MHz

F2 - Processing parameters  
 SI 65536  
 SF 499.8250256 MHz  
 WDW EM  
 SSB 0  
 AB 0  
 CB 0  
 PC 4.00

ID NMR plot parameters  
 CX 22.80 cm  
 CY 15.00 cm  
 F1 9.000 ppm  
 F2 4498.43 Hz  
 F3 -1.000 ppm  
 F4 -499.83 Hz  
 PCYCLE 0.43860 ppm/cm  
 HZCM 219.22150 Hz/cm

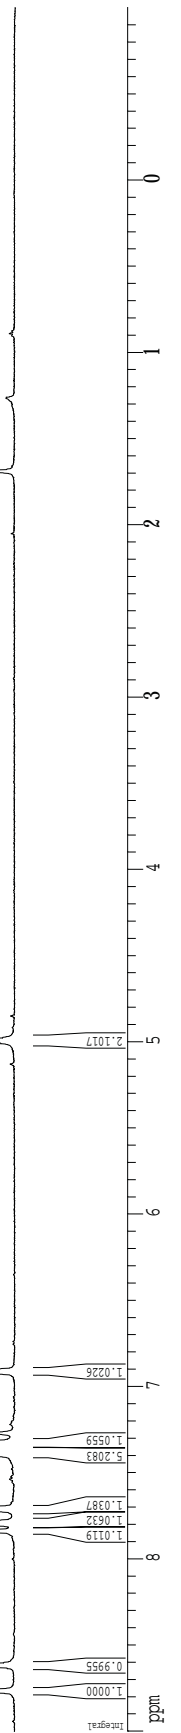

**<sup>13</sup>C spectrum with <sup>1</sup>H decoupling**

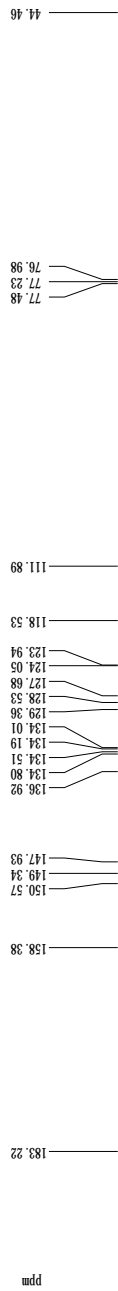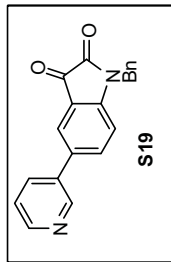

```

Current Data Parameters
=====
USER      mel11s
NAME      ME 1-93-ch
EXPNO     2
PROCNO    1

F2 - Acquisition Parameters
=====
Date_     20080121
Time      8.47
INSTRUM   gm500
PROBHD    5 mm broadband
PULPROG   zgpg30
TD         65536
SOLVENT   CDCl3
NS         408
DS         4
SWH        30303.031 Hz
FIDRES     0.462288 Hz
AQ         1.0813940 sec
RG         5792.6
DE         16.500 usec
TE         298.0 K
D1         0.25000000 sec
d11        0.03000000 sec
d111       0.00000000 sec
MCWRRK    0.01500000 sec

===== CHANNEL f1 =====
NUC1       13C
P1         7.08 usec
PL1        0.00 dB
SFO1       125.694269 MHz

===== CHANNEL f2 =====
CPDPRG2   md1ez16
NUC2       1H
P2         80.00 usec
PL2        -3.00 dB
SFO2       499.827493 MHz

F2 - Processing parameters
=====
SI         65536
SF         125.6810762 MHz
WDW        EM
SSB        0
LB         1.00 Hz
GB         0
PC         2.00

ID MR plot parameters
=====
CA         20.80 cm
CY         15.65 cm
F1P        200.000 ppm
F1         25136.23 Hz
F2P        -10.000 ppm
F2         -1256.81 Hz
PP4M       9.21053 ppm/cm
HZCM       1157.58837 Hz/cm
    
```

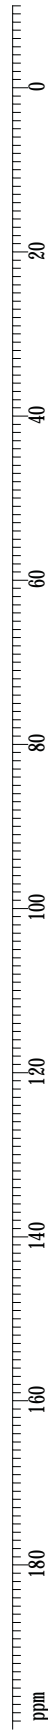

<sup>1</sup>H spectrum

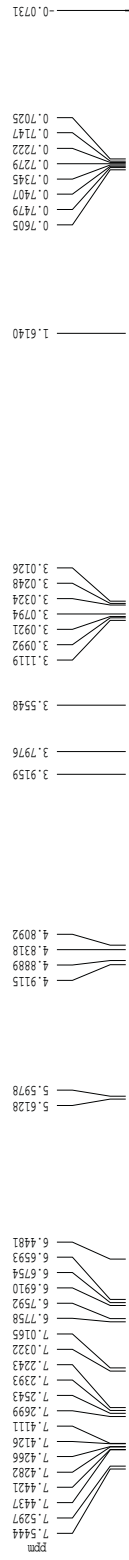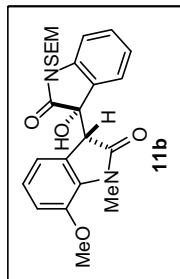

Current Data Parameters  
 USER: ranner  
 NAME: hr-1-165-1  
 EXPNO: 1  
 PROCNO: 1

F2 - Acquisition Parameters  
 Date\_: 20080115  
 Time: 9.06  
 INSTRUM: cryso00  
 PROBHD: 5 mm CPXI JF-  
 PULPROG: zgpg30  
 TD: 65536  
 SOLVENT: CDCl3  
 NS: 8  
 DS: 2  
 SWH: 8012.620 Hz  
 FIDRES: 0.098643 Hz  
 AQ: 5.098674 sec  
 RG: 5.7  
 DW: 62.400 usec  
 DE: 6.00 usec  
 TE: 298.0 K  
 D1: 0.1000000 sec  
 ACQRES1: 0.0000000 sec  
 ACQRES2: 0.0150000 sec

===== CHANNEL f1 =====  
 NUC1: <sup>1</sup>H  
 P1: 8.00 usec  
 PL1: 1.60 dB  
 SFO1: 500.2235015 MHz

F2 - Processing parameters  
 SI: 65536  
 SF: 500.2200261 MHz  
 WDW: EM  
 SSB: 0  
 AB: 0.00 Hz  
 CB: 0  
 PC: 4.00

ID NMR plot parameters  
 CX: 22.80 cm  
 CY: 30.00 cm  
 F1P: 8.000 ppm  
 F1: 4001.76 Hz  
 F2P: -1.000 ppm  
 F2: -500.22 Hz  
 PPM0: 0.39474 ppm/cm  
 HZ0: 197.45528 Hz/cm

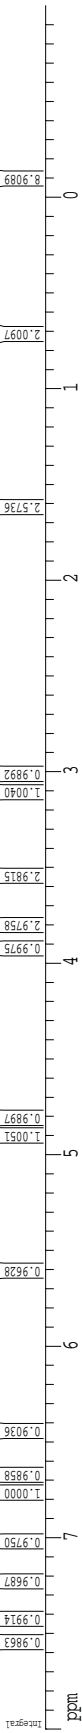

<sup>13</sup>C spectrum with <sup>1</sup>H decoupling

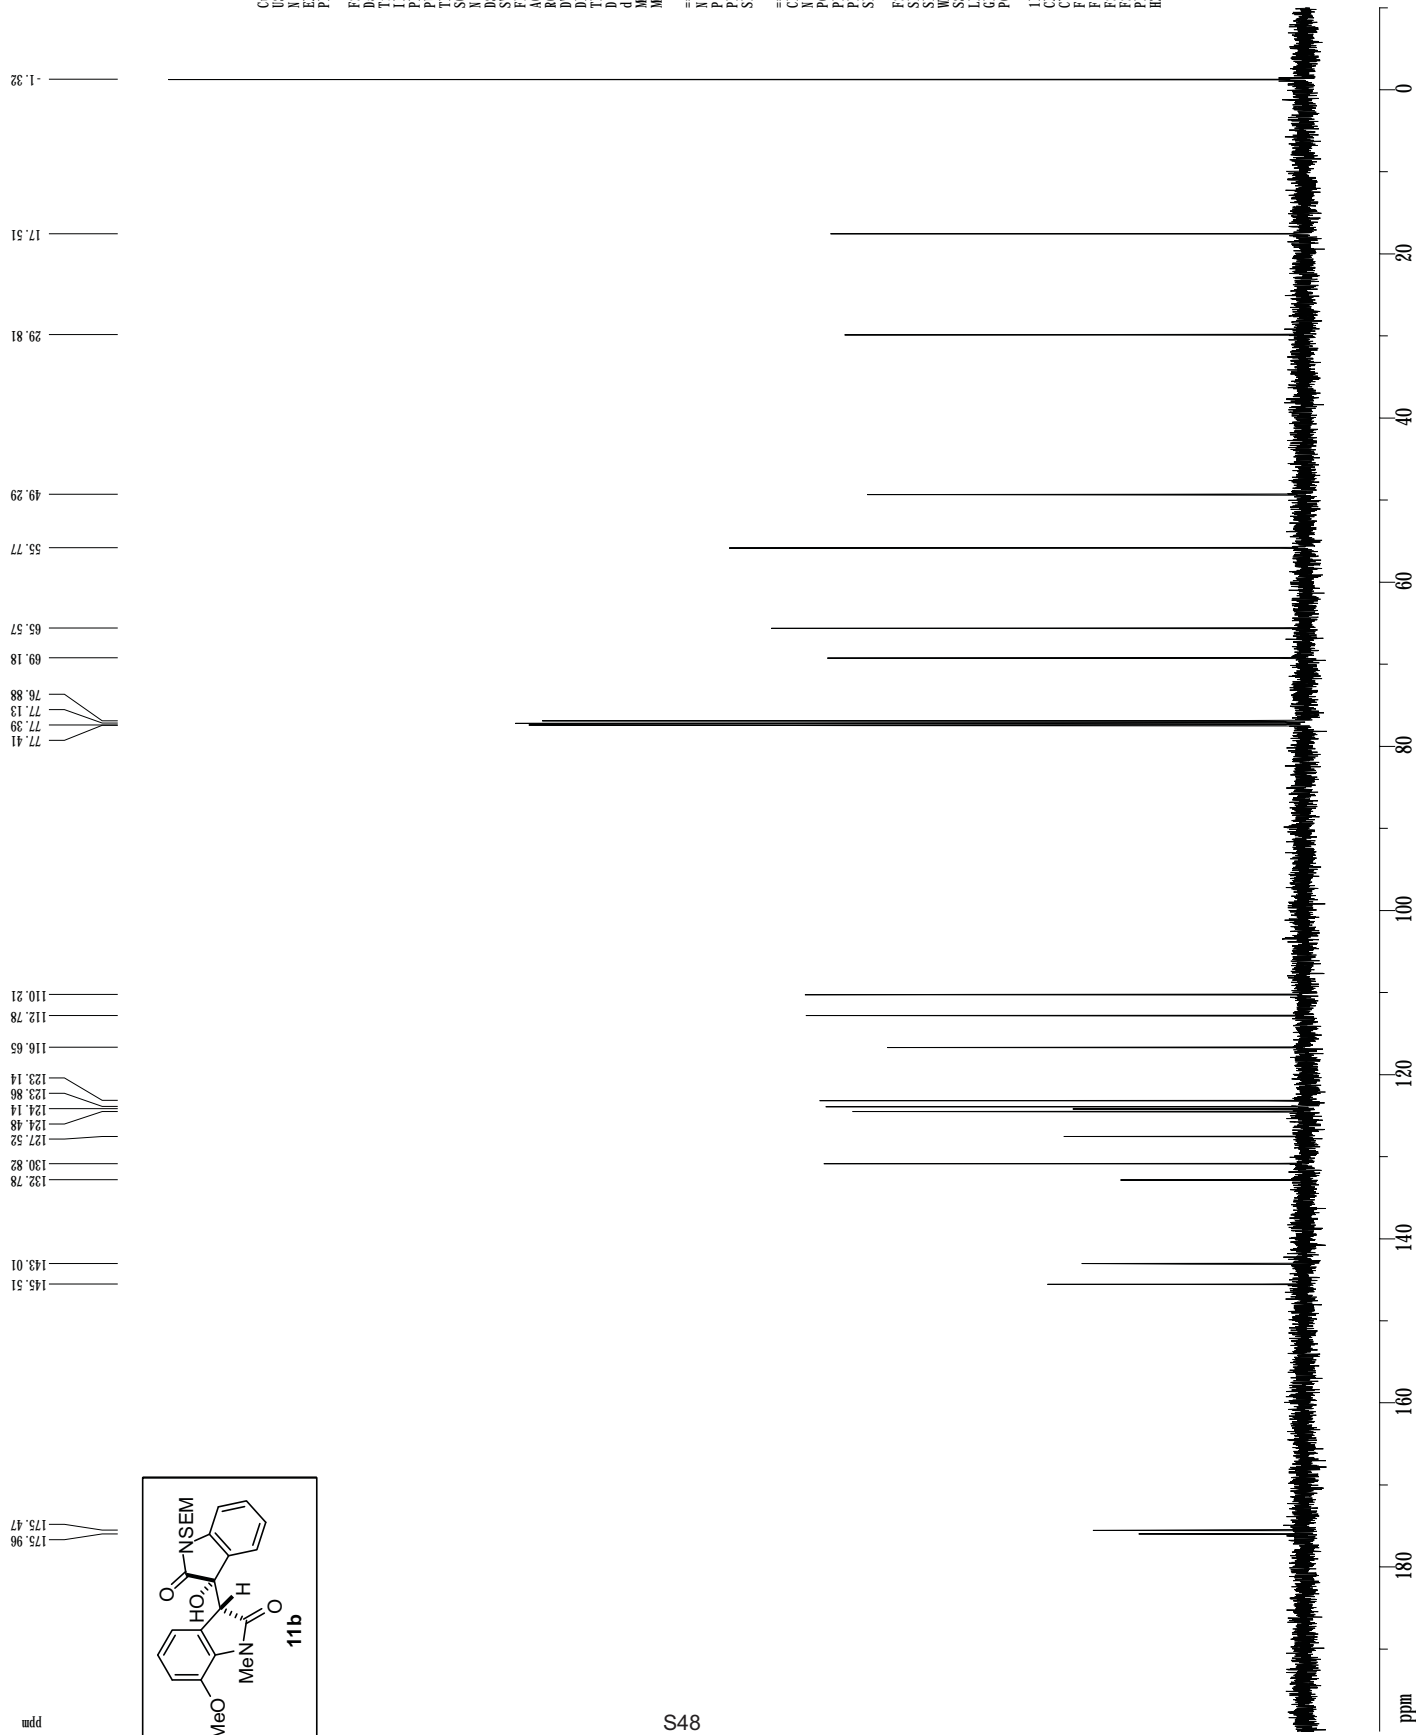

<sup>1</sup>H spectrum

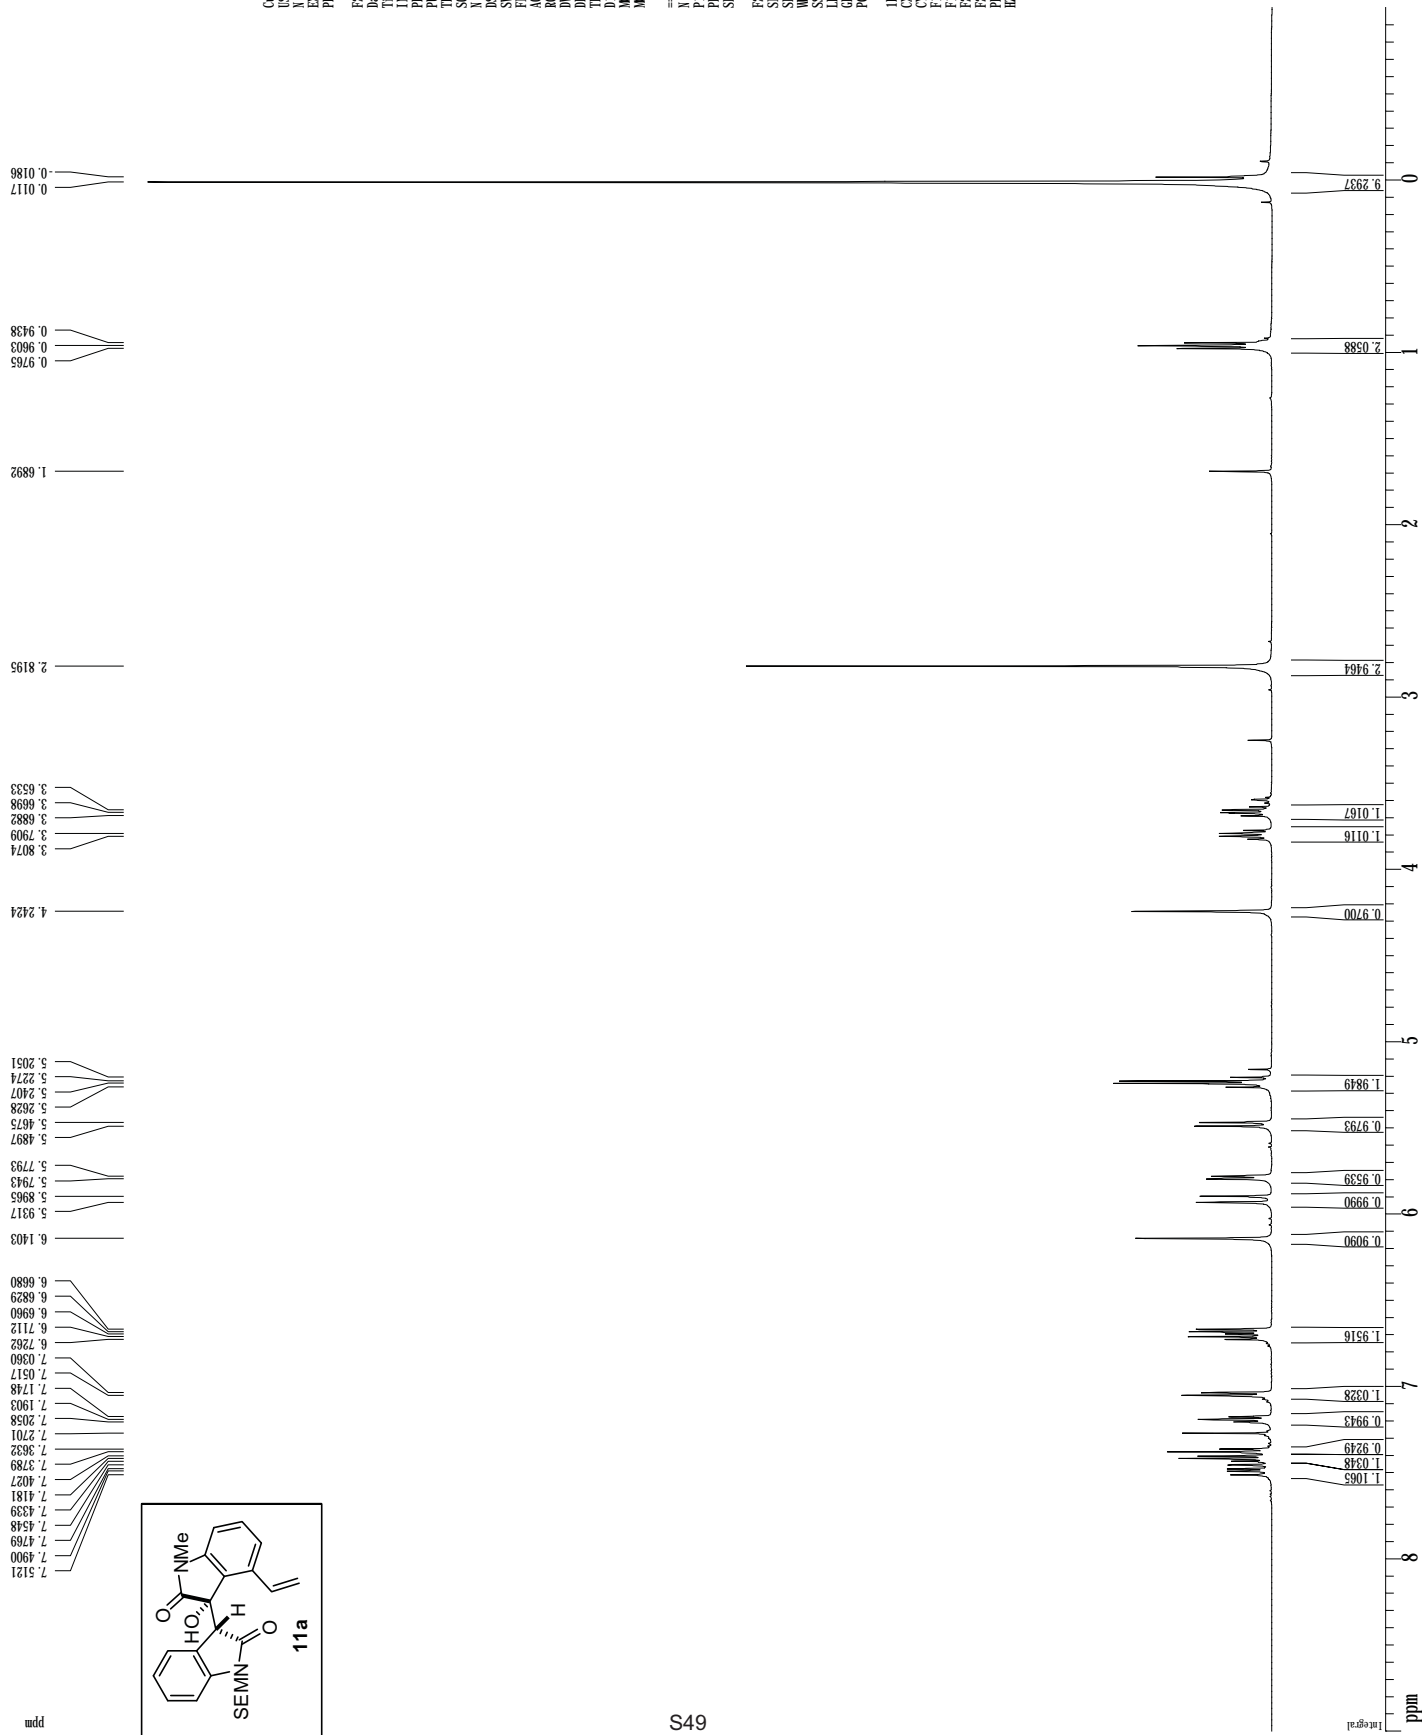

Current Data Parameters  
 USER mel1s  
 NAME ME 1-67  
 EXPNO 1  
 PROCNO 1

F2 - Acquisition Parameters  
 Date\_ 20071123  
 Time 13.03  
 INSTRUM cryo000  
 PULPROG zgpg30  
 HARD 5 mm CPCLP 1H  
 TD 65536  
 SFO1 500.136261 MHz  
 SOLVENT CDCl3  
 NS 16  
 DS 2  
 SWH 8012.620 Hz  
 FIDRES 0.098043 Hz  
 AQ 5.0989774 sec  
 RG 4.5  
 DW 62.400 usec  
 DE 6.00 usec  
 TE 298.0 K  
 AQC 0.1000000 sec  
 ACQST 0.1000000 sec  
 MCKWA 0.0150000 sec

===== CHANNEL f1 =====  
 NUC1 1H  
 P1 8.00 usec  
 PL1 1.60 dB  
 SFO1 500.2235015 MHz

F2 - Processing parameters  
 SI 65536  
 SF 500.2200257 MHz  
 EQ EM  
 NS 0  
 DS 0  
 GB 0  
 PC 4.00

ID WB plot parameters  
 CX 22.80 cm  
 CY 14.89 cm  
 FIP 9.000 ppm  
 FI 4501.98 Hz  
 F2P -1.000 ppm  
 F2 -500.22 Hz  
 PPMCM 0.43860 ppm/cm  
 HZCM 219.38476 Hz/cm

13C spectrum with 1H decoupling

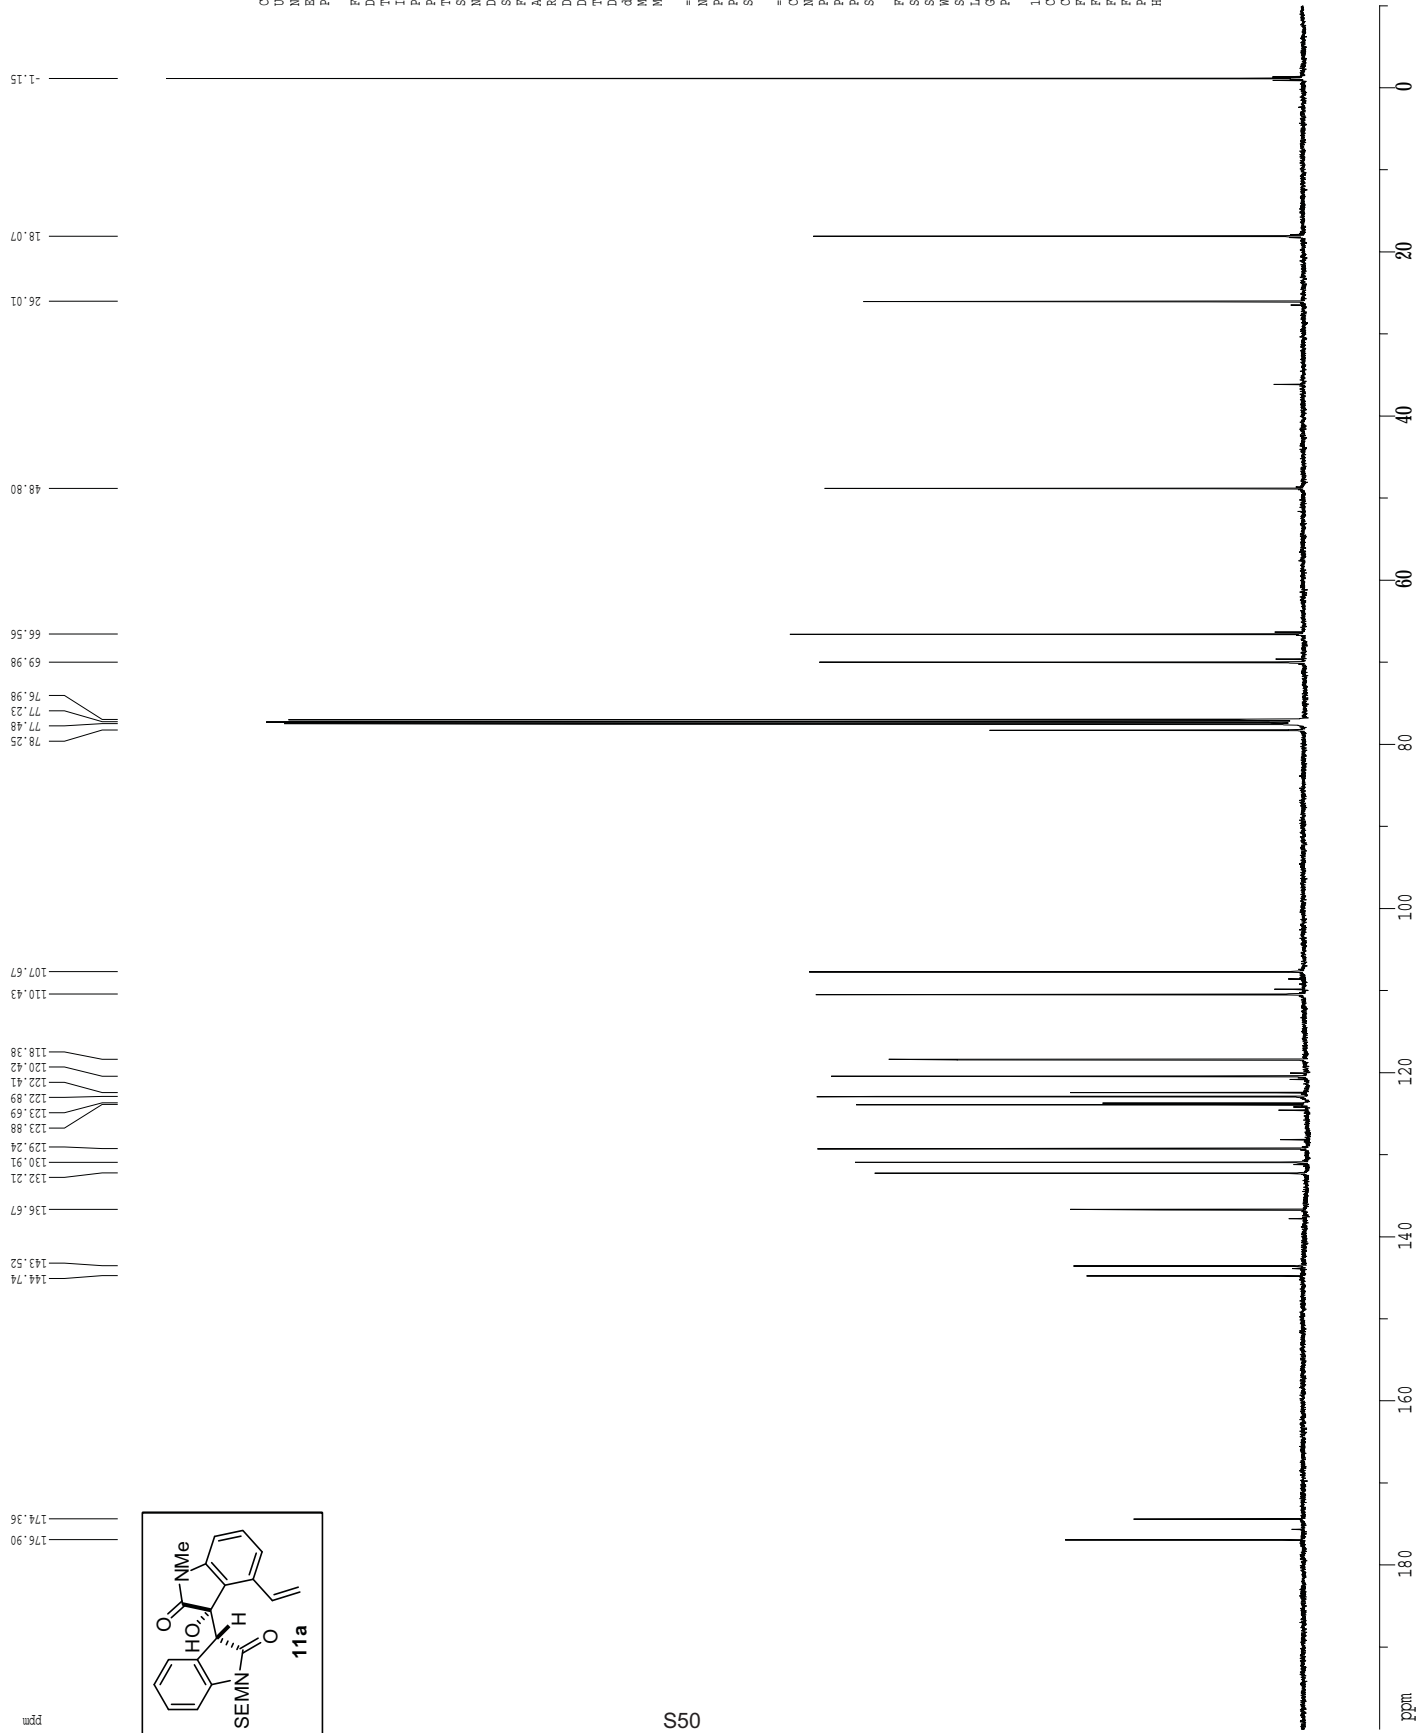

```

Current Data Parameters
USER      mellis
NAME      MB 1-67
EXNO      4
PROCNO    1

F2 - Acquisition Parameters
Date_     20071123
Time      13.19
INSTRUM   cryo500
PROBHD    5 mm CPTCI 1H-
PULPROG   zgpg30
TD         65418
SOLVENT    CDCl3
NS         1021
DS         4
SFO        30303.031 Hz
FIDRES     0.463222 Hz
AQ          1.078470 sec
RG         14596 S
DW         16.500 usec
DE          6.00 usec
TE         298.0 K
D1         0.25000000 sec
d11        0.03000000 sec
MCREST     0.00000000 sec
MORF       0.01500000 sec

===== CHANNEL F1 =====
NUC1       13C
P1         15.00 usec
PL1        -1.00 dB
SFO1       125.7942548 MHz

===== CHANNEL F2 =====
CPDPRG2    waltz16
NUC2       1H
P2         100.00 usec
PL2        1.60 dB
P412       23.54 dB
SFO2       500.2225011 MHz

F2 - Processing parameters
SI         65536
SF         125.7804029 MHz
WDW        EM
SSB        0
GB         0
LB         1.00 Hz
PC         2.00

ID NMR plot parameters
CX         2.00 cm
CY         15.00 cm
F1P        200.000 ppm
F1         25156.08 Hz
F2P        -10.000 ppm
F2         -1257.80 Hz
PRNCM      9.21053 ppm/cm
HZCM       1188.50366 Hz/cm
    
```

**<sup>1</sup>H spectrum**

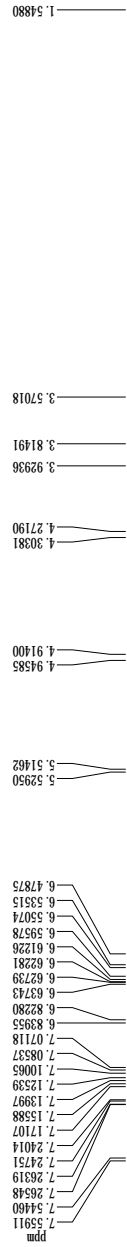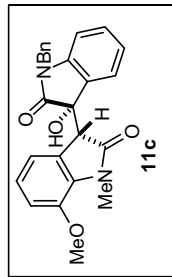

Current Data Parameters  
 USER Jmg  
 NAME JW1-250prod  
 EXPNO 101  
 PROCNO 1

F2 - Acquisition Parameters  
 Date\_ 20080204  
 Time 20.03  
 INSTRUM cryo500  
 PULPROG zgpg30  
 FIDRES 5 mm CPTCL JG  
 AQ 81.28  
 TD 65536  
 SOLVENT COM3  
 NS 16  
 DS 2  
 SWH 8012.820 Hz  
 FIDRES 0.098043 Hz  
 AQ 5.098974 sec  
 RG 5.7  
 DW 62.400 usec  
 DE 6.00 usec  
 TE 298.0 K  
 P1 0.1000000 sec  
 PC 0.1000000 sec  
 ACQST 0.0150000 sec  
 MCW 0.0150000 sec

===== CHANNEL f1 =====  
 NUC1 <sup>1</sup>H  
 P1 8.00 usec  
 PL1 1.60 dB  
 SF01 500.2235015 MHz

F2 - Processing parameters  
 SI 65536  
 SF 500.2200404 MHz  
 MDW EM  
 SSF 0 Hz  
 GB 0  
 PC 4.00

ID MR plot parameters  
 CX 22.80 cm  
 CY 15.00 cm  
 FIP 8.000 ppm  
 FI 4001.76 Hz  
 F2P -1.000 ppm  
 F2 -500.22 Hz  
 PPMCM 0.39874 ppm/cm  
 HZCM 197.45328 Hz/cm

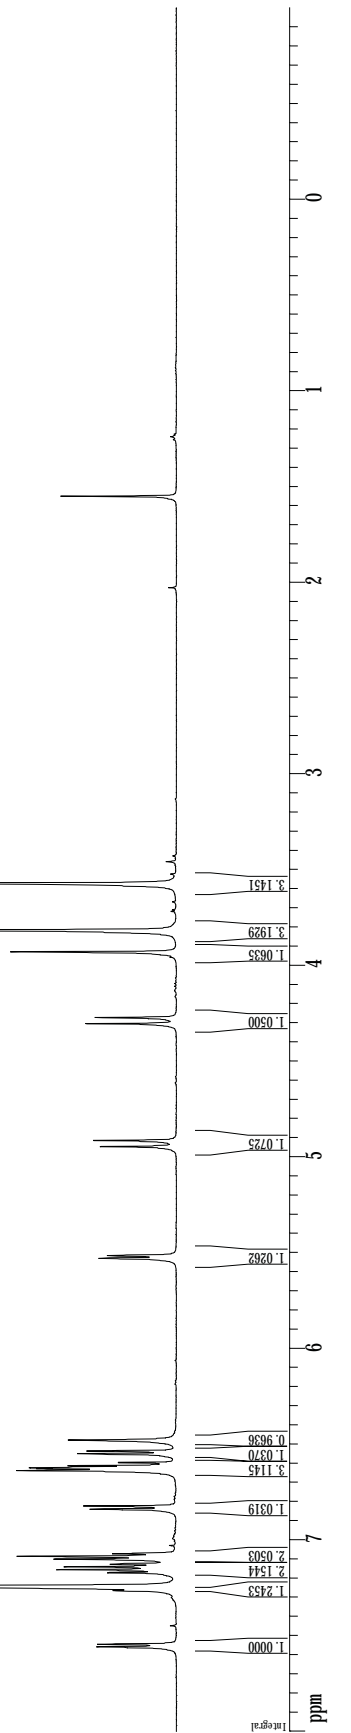



13C spectrum with 1H decoupling

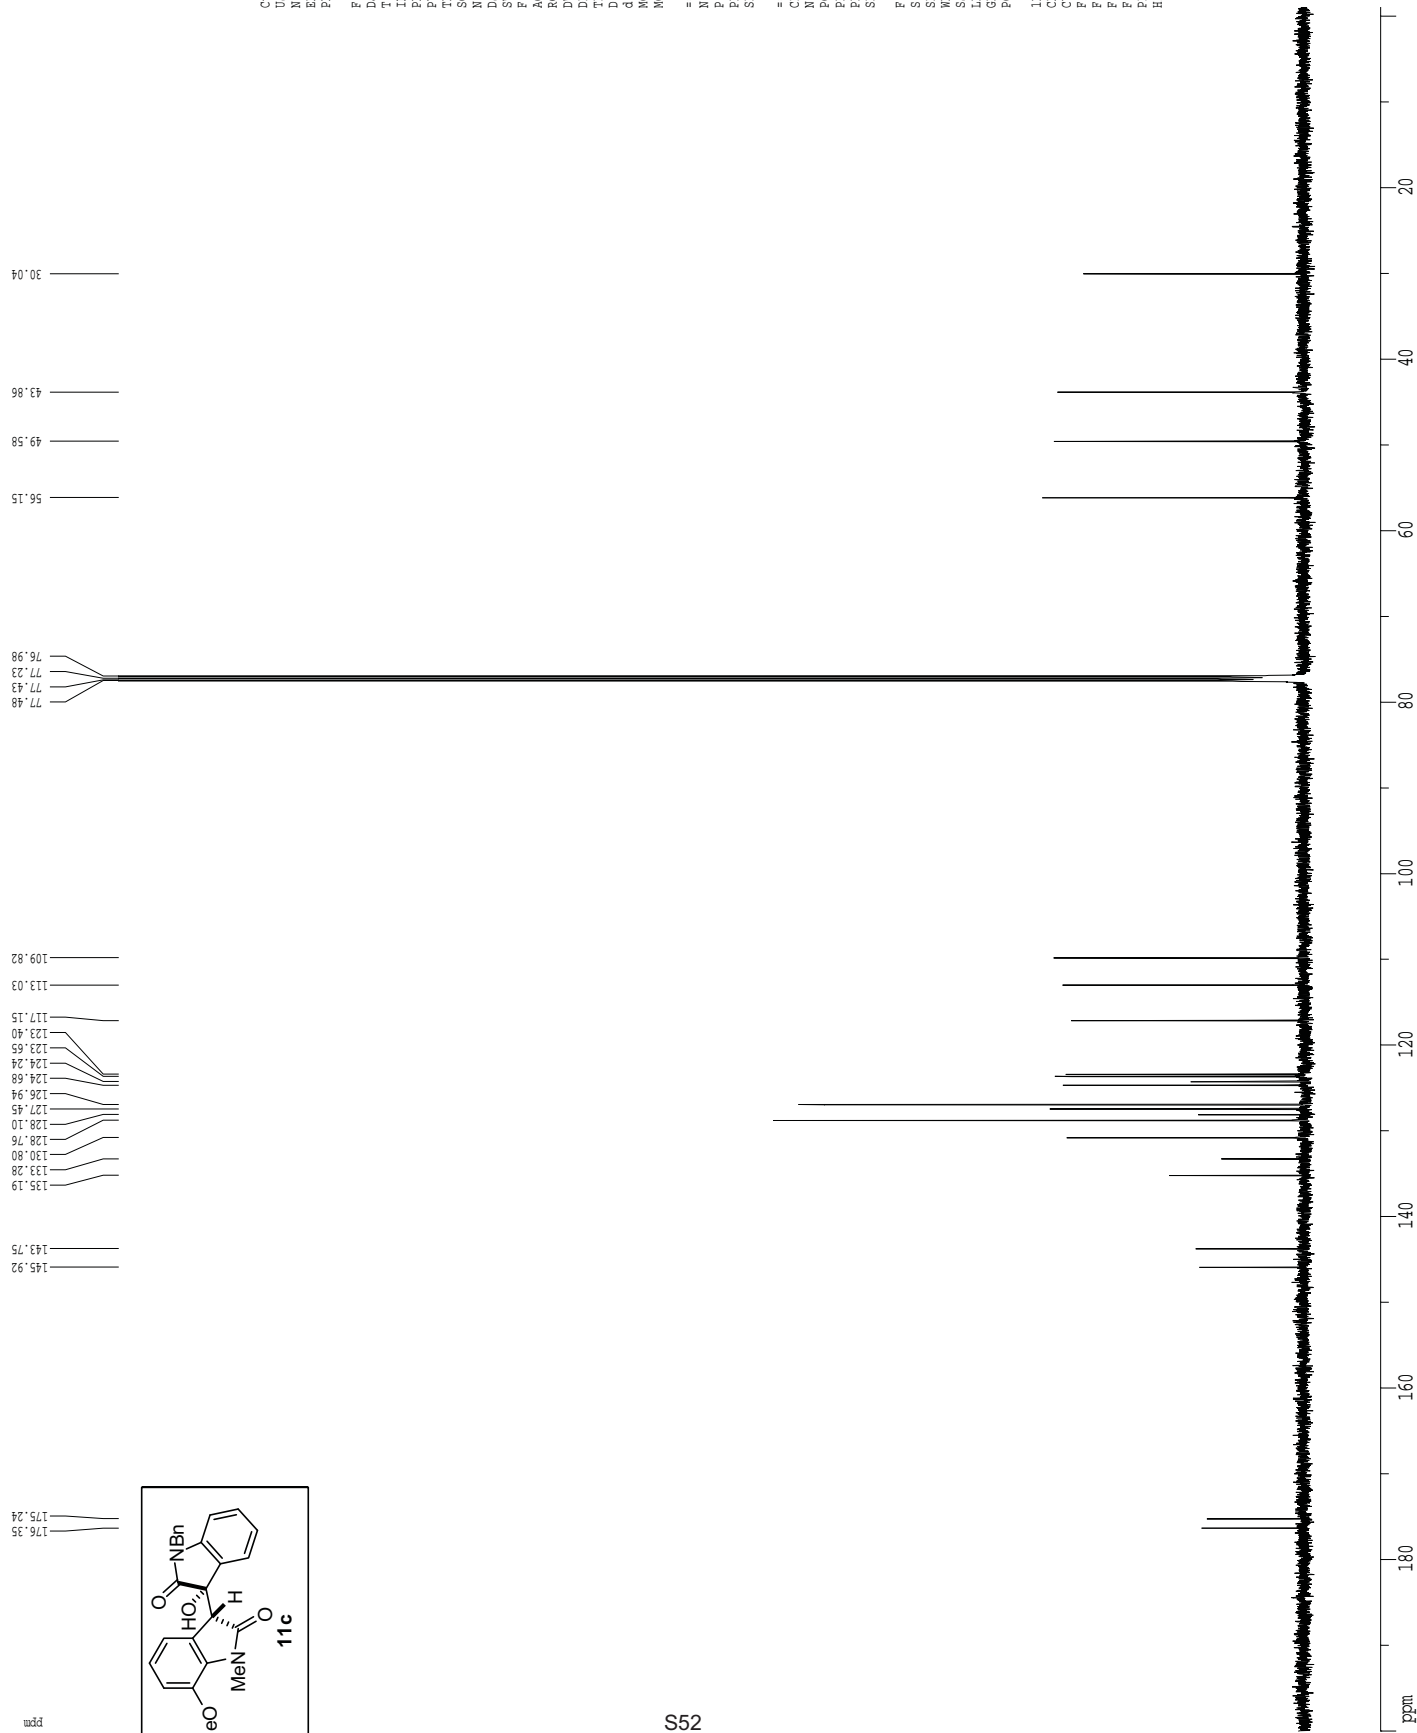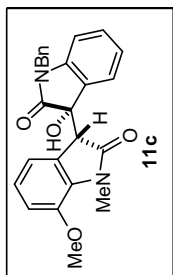

```

Current Data Parameters
USER          jlorenz
NAME          JW-1-250prod
EXNO         104
PROCNO        1

F2 - Acquisition Parameters
Date_         20080204
Time          20.32
INSTRUM       cryo500
PROBHD        5 mm CPXI 1H-
PULPROG       zgpg30
TD            65418
SOLVENT       CDCl3
NS            1024
DS            4
SFO1          30303.031 Hz
SF            0.463222 Hz
RG            1.0794470 sec
RG            13004
DM            16.500 usec
DE            6.00 usec
TE            298.0 K
D1            0.25000000 sec
d11           0.03000000 sec
MCREST        0.00000000 sec
MCWREK        0.01500000 sec

===== CHANNEL F1 =====
NUC1          13C
P1            15.00 usec
PL1           -1.00 dB
SFO1          125.7942546 MHz

===== CHANNEL F2 =====
CPDPRG2       waltz16
NUC2          1H
PCPD2         100.00 usec
PL2           1.60 dB
PL12          23.54 dB
SFO2          500.2225011 MHz

F2 - Processing parameters
SI            65536
SF            125.7803992 MHz
WDW           EM
SSB           0
LB            1.00 Hz
GB            0
PC            2.00

1D NMR plot parameters
AQ            2.280 sec
AQ            44.48 sec
FID           200.000 ppm
F1            25156.08 Hz
F2           -1.000 ppm
F2           -125.78 Hz
PRNCM         8.81579 ppm/cm
HZCM          1108.85352 Hz/cm
    
```

**<sup>1</sup>H spectrum**

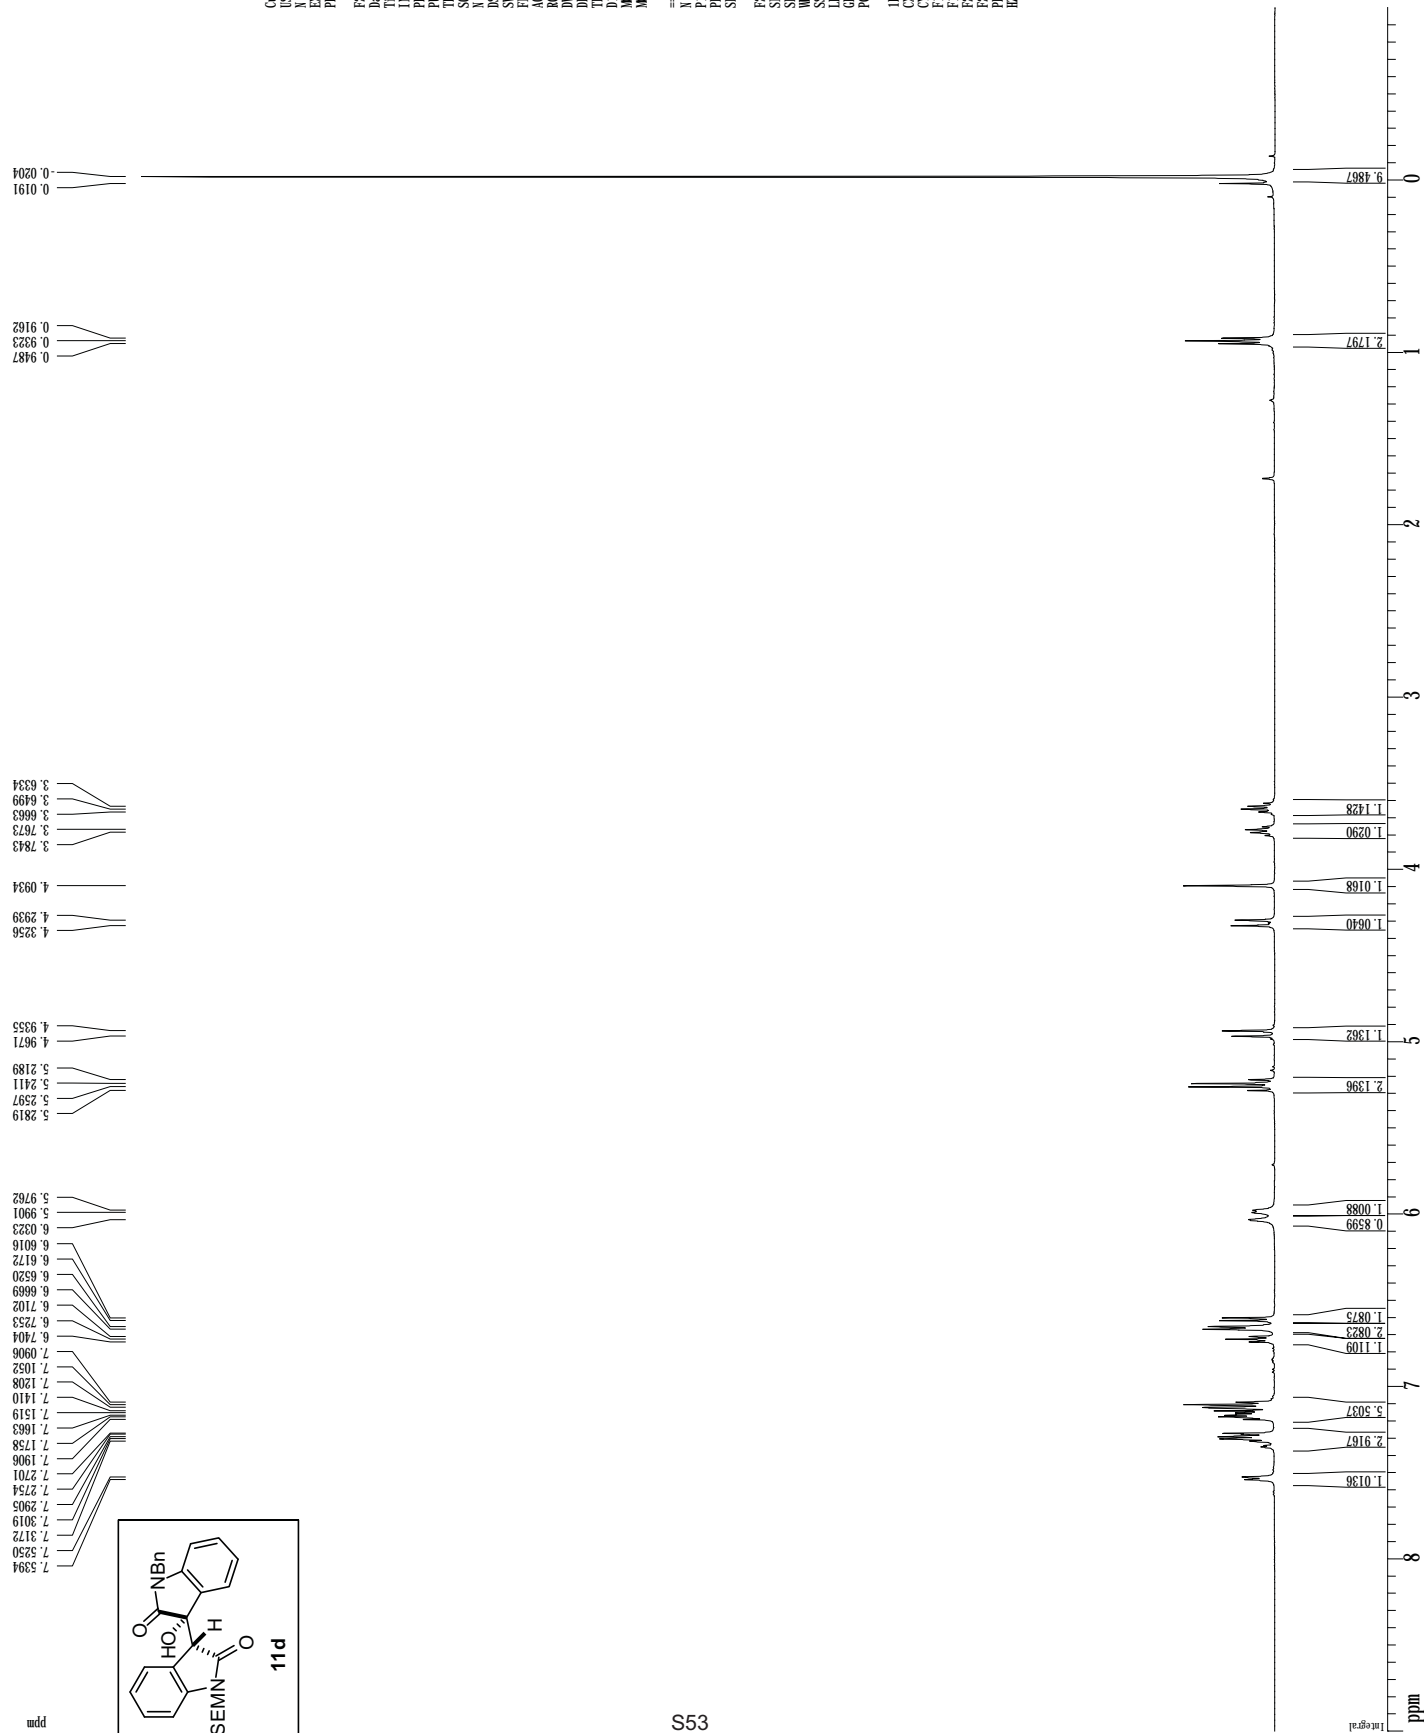

Current Data Parameters  
 USER mel1s  
 NAME ME 1-65  
 EXPNO 1  
 PROCNO 1

F2 - Acquisition Parameters  
 Date\_ 20071201  
 Time 21.08  
 INSTRUM gpc500  
 PULPROG zgpg30  
 FIDRES 5 mm broadband  
 AQ 5.098974 sec  
 RG 45.3  
 DW 62.400 usec  
 DE 6.00 usec  
 TE 298.0 K  
 PREST 0.1000000 sec  
 FWHM 0.4600000 sec  
 ACQPRG 0.01500000 sec  
 CHANNEL f1

===== CHANNEL f1 =====  
 NU1 1H  
 P1 12.00 usec  
 PL1 -3.00 dB  
 SF01 498.828488 MHz

F2 - Processing parameters  
 SI 65359  
 SF 498.825025 MHz  
 EQ EM  
 AS 0  
 B 0 Hz  
 GB 0  
 PC 4.00

ID NR plot parameters  
 CX 22.80 cm  
 CY 15.00 cm  
 FIP 9.000 ppm  
 FI 4498.43 Hz  
 F2P -1.000 ppm  
 F2 -499.83 Hz  
 PPMCM 0.43860 ppm/cm  
 HZCM 219.22150 Hz/cm



<sup>1</sup>H spectrum

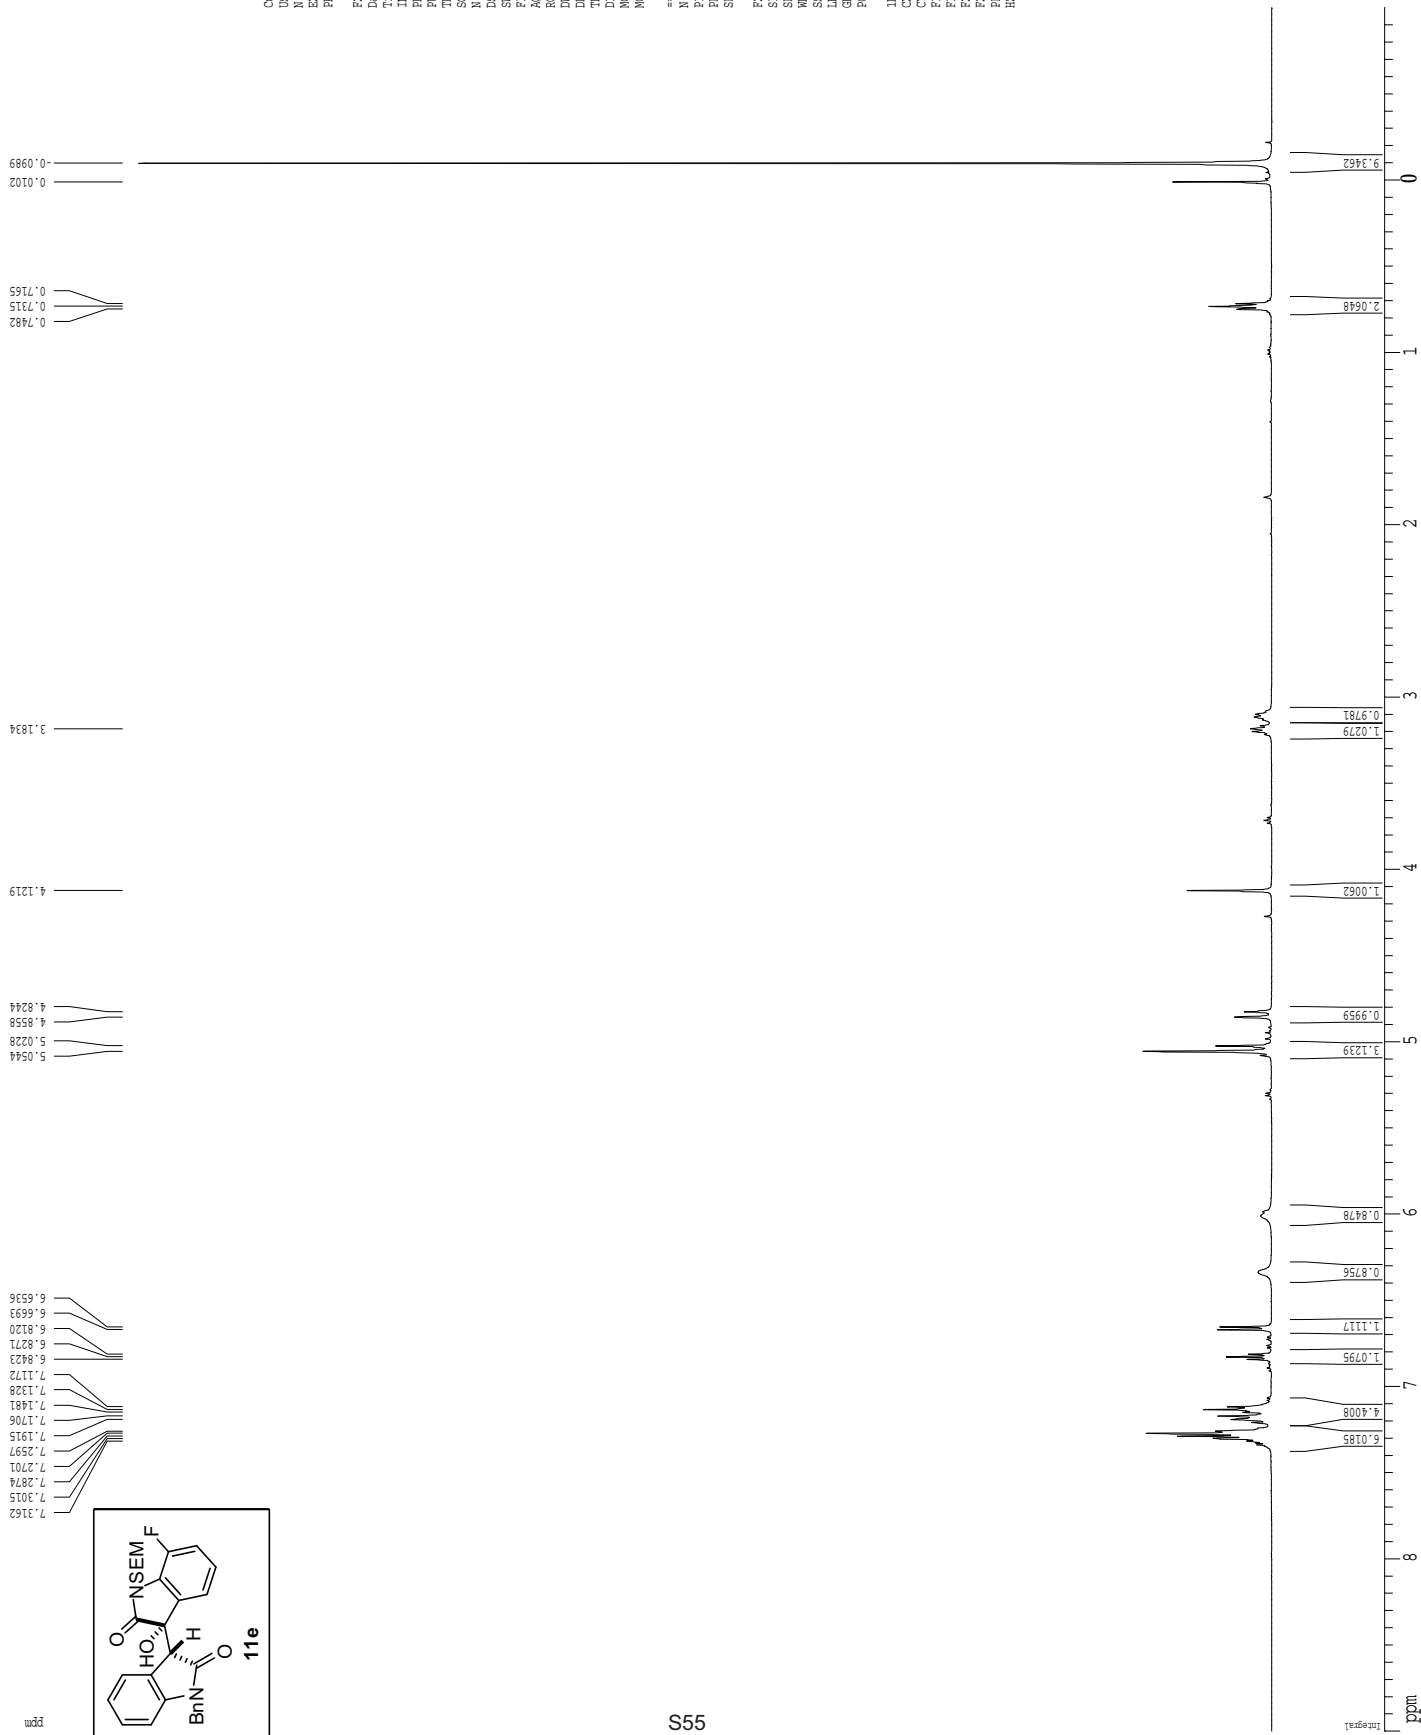

Current Data Parameters  
 USER melis  
 NAME ME 1-73  
 EXPMO 1  
 PROCNO 1

F2 - Acquisition Parameters  
 Date\_ 20071202  
 Time 7:58  
 INSTRUM gms00  
 PULPROG zgpg30  
 FREQID 5 mm broadband  
 F2 499.8250955 MHz  
 TO 4123  
 SOLVENT CDCl3  
 NS 8  
 DS 2  
 SWH 8012.820 Hz  
 FIDRES 0.098843 Hz  
 AQ 5.0398774 sec  
 RG 45.3  
 DW 62.400 usec  
 DE 6.00 usec  
 TE 298.0 K  
 DL 0.1000000 sec  
 ACQRES 0.0000000 sec  
 PCWCK 0.0150000 sec

===== CHANNEL f1 =====  
 NUC1 1H  
 P1 12.00 usec  
 PL1 -3.00 dB  
 SFO1 499.8284968 MHz

F2 - Processing parameters  
 SI 65556  
 SF 499.8250955 MHz  
 WDW EM  
 SSB 0  
 AB 0  
 CB 0  
 PC 4.00

1D NMR plot parameters  
 CX 22.80 cm  
 CY 15.00 cm  
 FIP 9.000 ppm  
 F1 4498.43 Hz  
 F2P -1.000 ppm  
 F2 -499.83 Hz  
 PRCM 0.43860 ppm/cm  
 HZCM 219.22150 Hz/cm



ME 1-107  
 1H spectrum

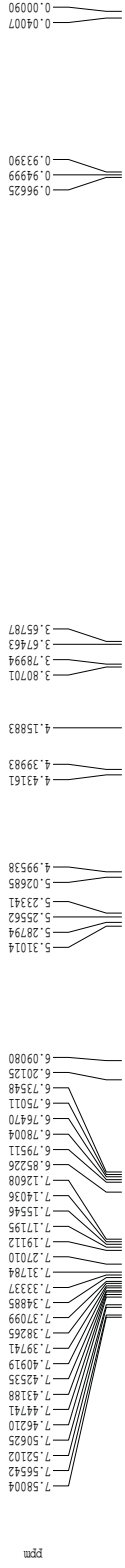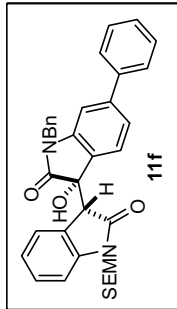

Current Data Parameters  
 USER mellis  
 NAME ME 1-107-Chara  
 EXNO 1  
 PROCNO 1

F2 - Acquisition Parameters  
 Date\_ 20080111  
 Time 17:15  
 INSTRUM spect  
 PROBHD 5 mm broad  
 PULPROG zgpg30  
 TD 65536  
 SFO1 499.8284888 MHz  
 SOLVENT CDCl3  
 NS 16  
 DS 2  
 SWH 8012.820 Hz  
 FIDRES 0.09843 Hz  
 AQ 5.099774 sec  
 RG 35.9  
 DW 62.400 usec  
 DE 6.00 usec  
 TE 298.0 K  
 AXC 0.1000000 sec  
 ACQ 0.1000000 sec  
 MCKEY 0.01500000 sec

===== CHANNEL f1 =====  
 NUC1 1H  
 P1 12.00 usec  
 PL1 -3.00 dB  
 SFO1 499.8284888 MHz

F2 - Processing parameters  
 S1 65536  
 SF 499.8250252 MHz  
 AQC 0  
 EQ 0  
 GB 0  
 HB 0.30 Hz  
 HS 0  
 PC 4.00

ID NMR plot parameters  
 CX 22.80 cm  
 CY 15.00 cm  
 FIP 9.000 ppm  
 F1 4998.43 Hz  
 F2 -1.000 ppm  
 FZ -499.83 Hz  
 PRCN 0.43960 ppm/cm  
 RZCN 219.22150 Hz/cm

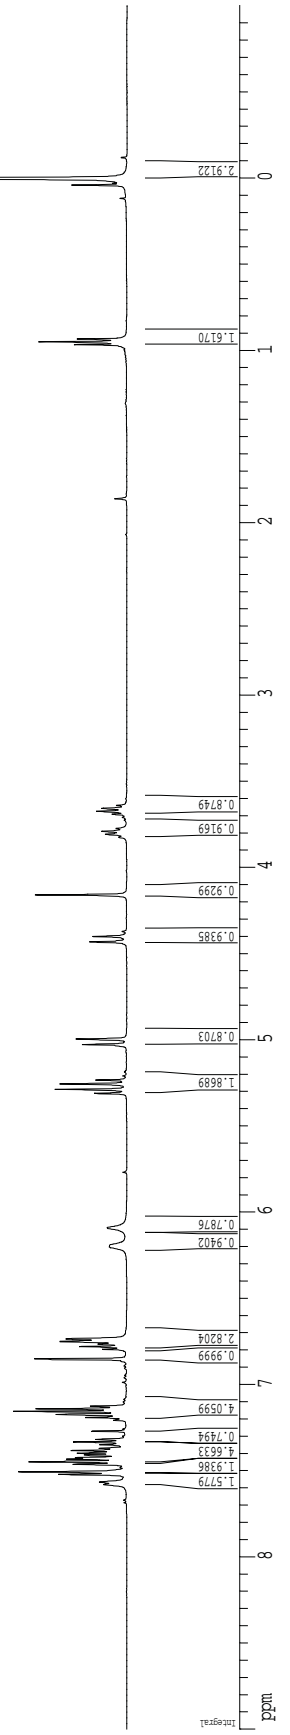

<sup>13</sup>C spectrum with <sup>1</sup>H decoupling

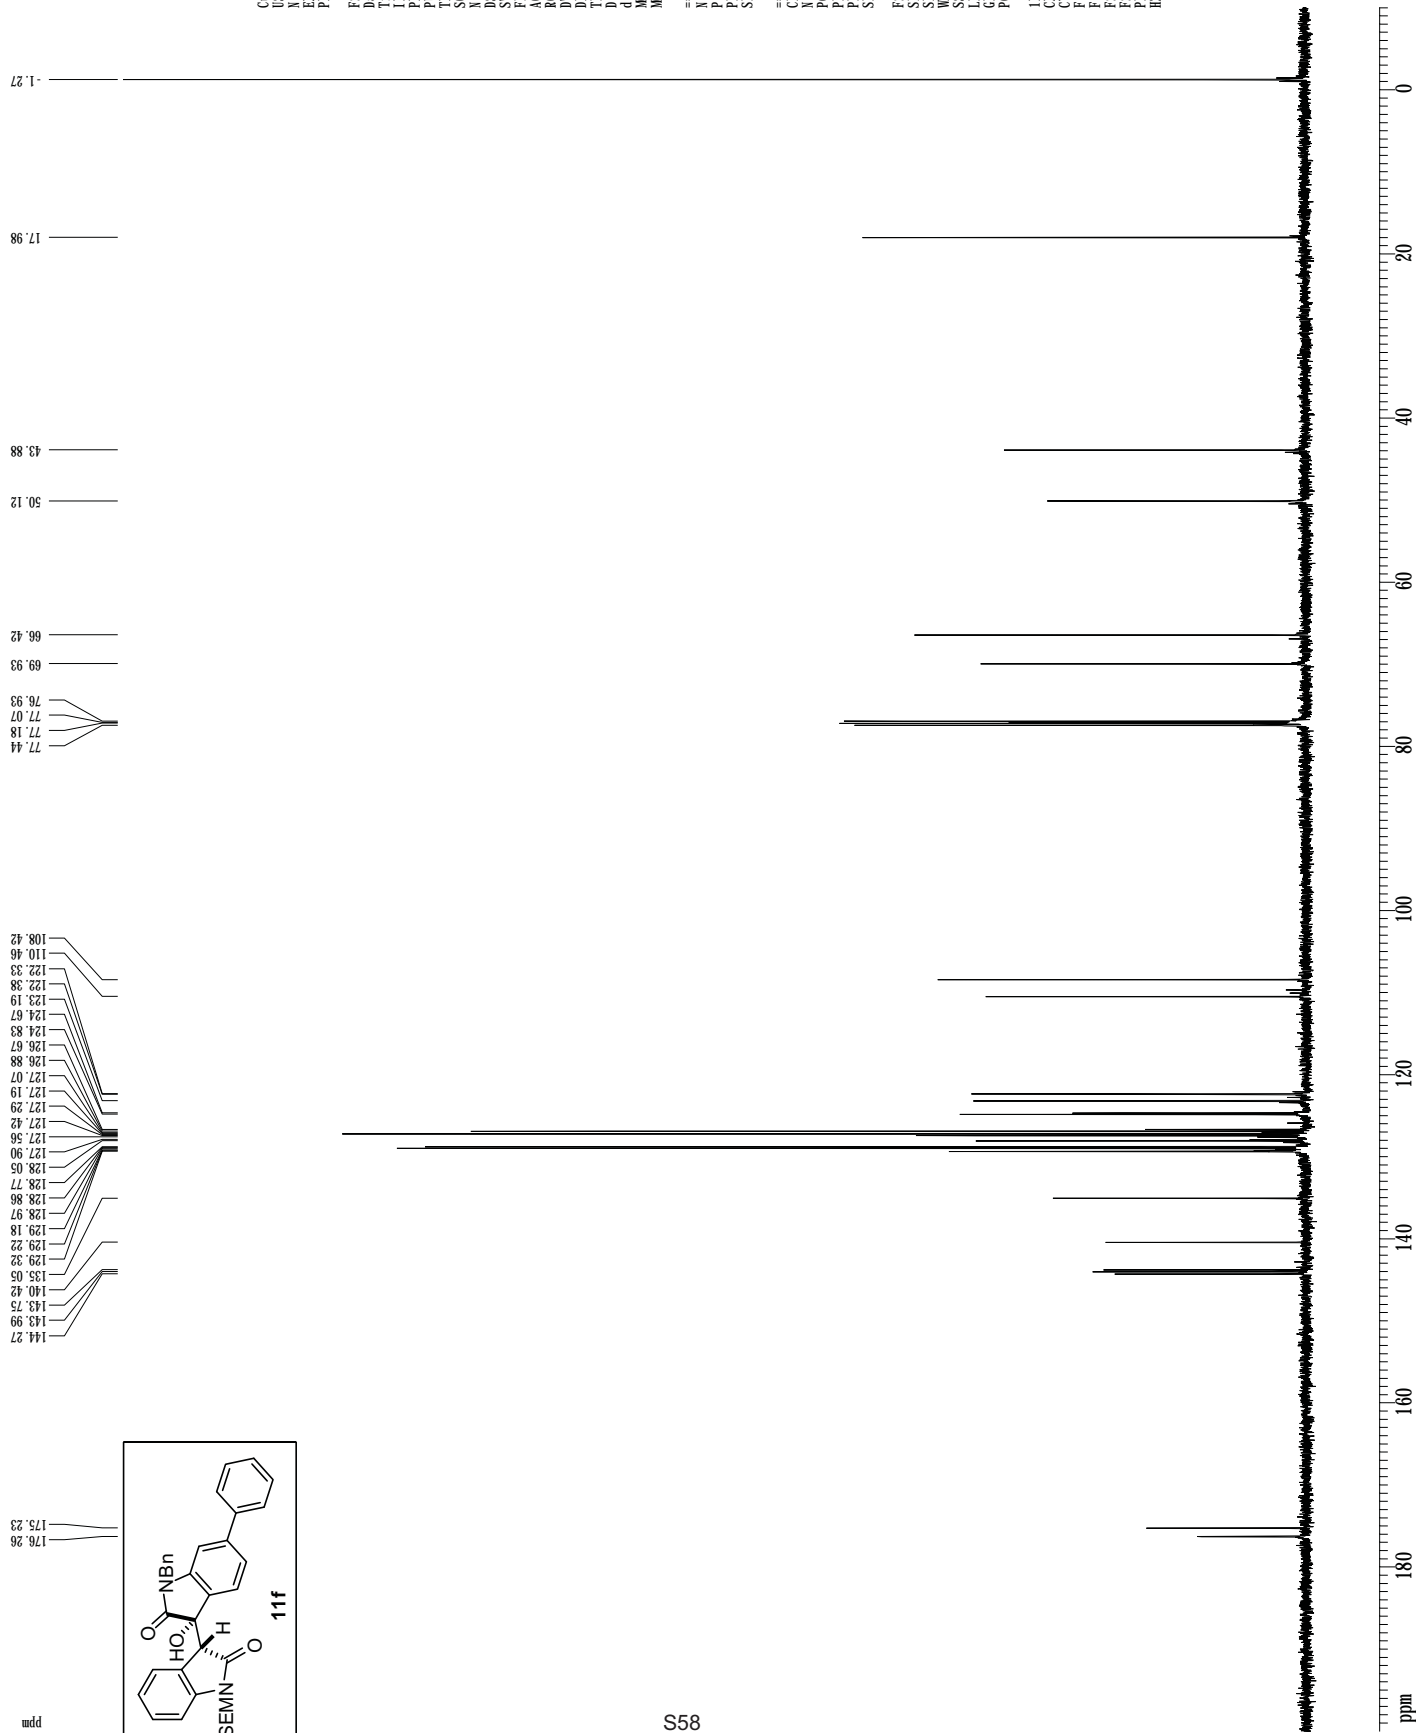

**<sup>1</sup>H spectrum**

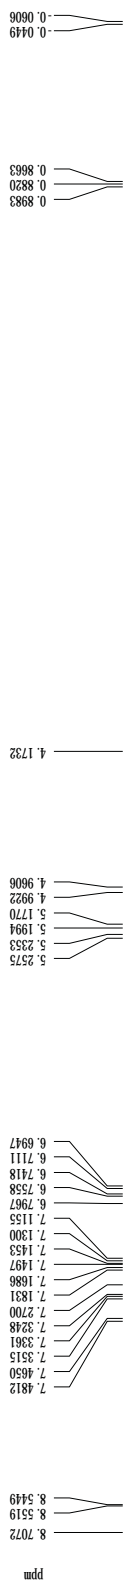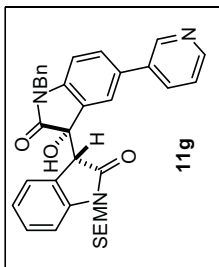

Current Data Parameters  
 USER mel1s  
 NAME ME-1-114-ch  
 EXPNO 1  
 PROCNO 1

F2 - Acquisition Parameters  
 Date\_ 2008021  
 Time 9.13  
 INSTRUM cryo050  
 PULPROG zgpg30  
 TD 65536  
 SOLVENT COM3  
 NS 8  
 DS 2  
 SWH 8012.820 Hz  
 FIDRES 0.098043 Hz  
 AQ 5.0989774 sec  
 RG 5  
 DW 62.400 usec  
 DE 6.00 usec  
 TE 298.0 K  
 AFT2ST 0.1000000 sec  
 SFO1 500.1360000 sec  
 ACQPRG 0.0150000 sec  
 MCHWK 0.0150000 sec

===== CHANNEL f1 =====  
 NU1 1H  
 P1 8.00 usec  
 PL1 1.60 dB  
 SFO1 500.2235015 MHz

F2 - Processing parameters  
 SI 65536  
 SF 500.2200257 MHz  
 MDW EM  
 SSB 0 Hz  
 GB 0  
 PC 4.00

ID MR plot parameters  
 CX 22.80 cm  
 CY 15.00 cm  
 FIP 9.000 ppm  
 FI 4501.98 Hz  
 F2P -1.000 ppm  
 F2 -500.22 Hz  
 PPMCM 0.43860 ppm/cm  
 HZCM 219.39476 Hz/cm

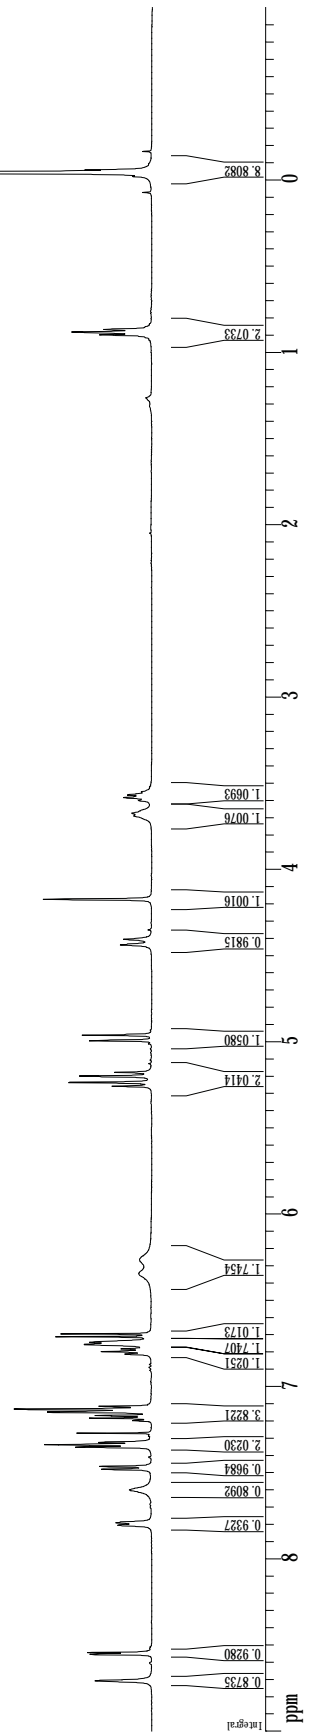



<sup>13</sup>C spectrum with <sup>1</sup>H decoupling

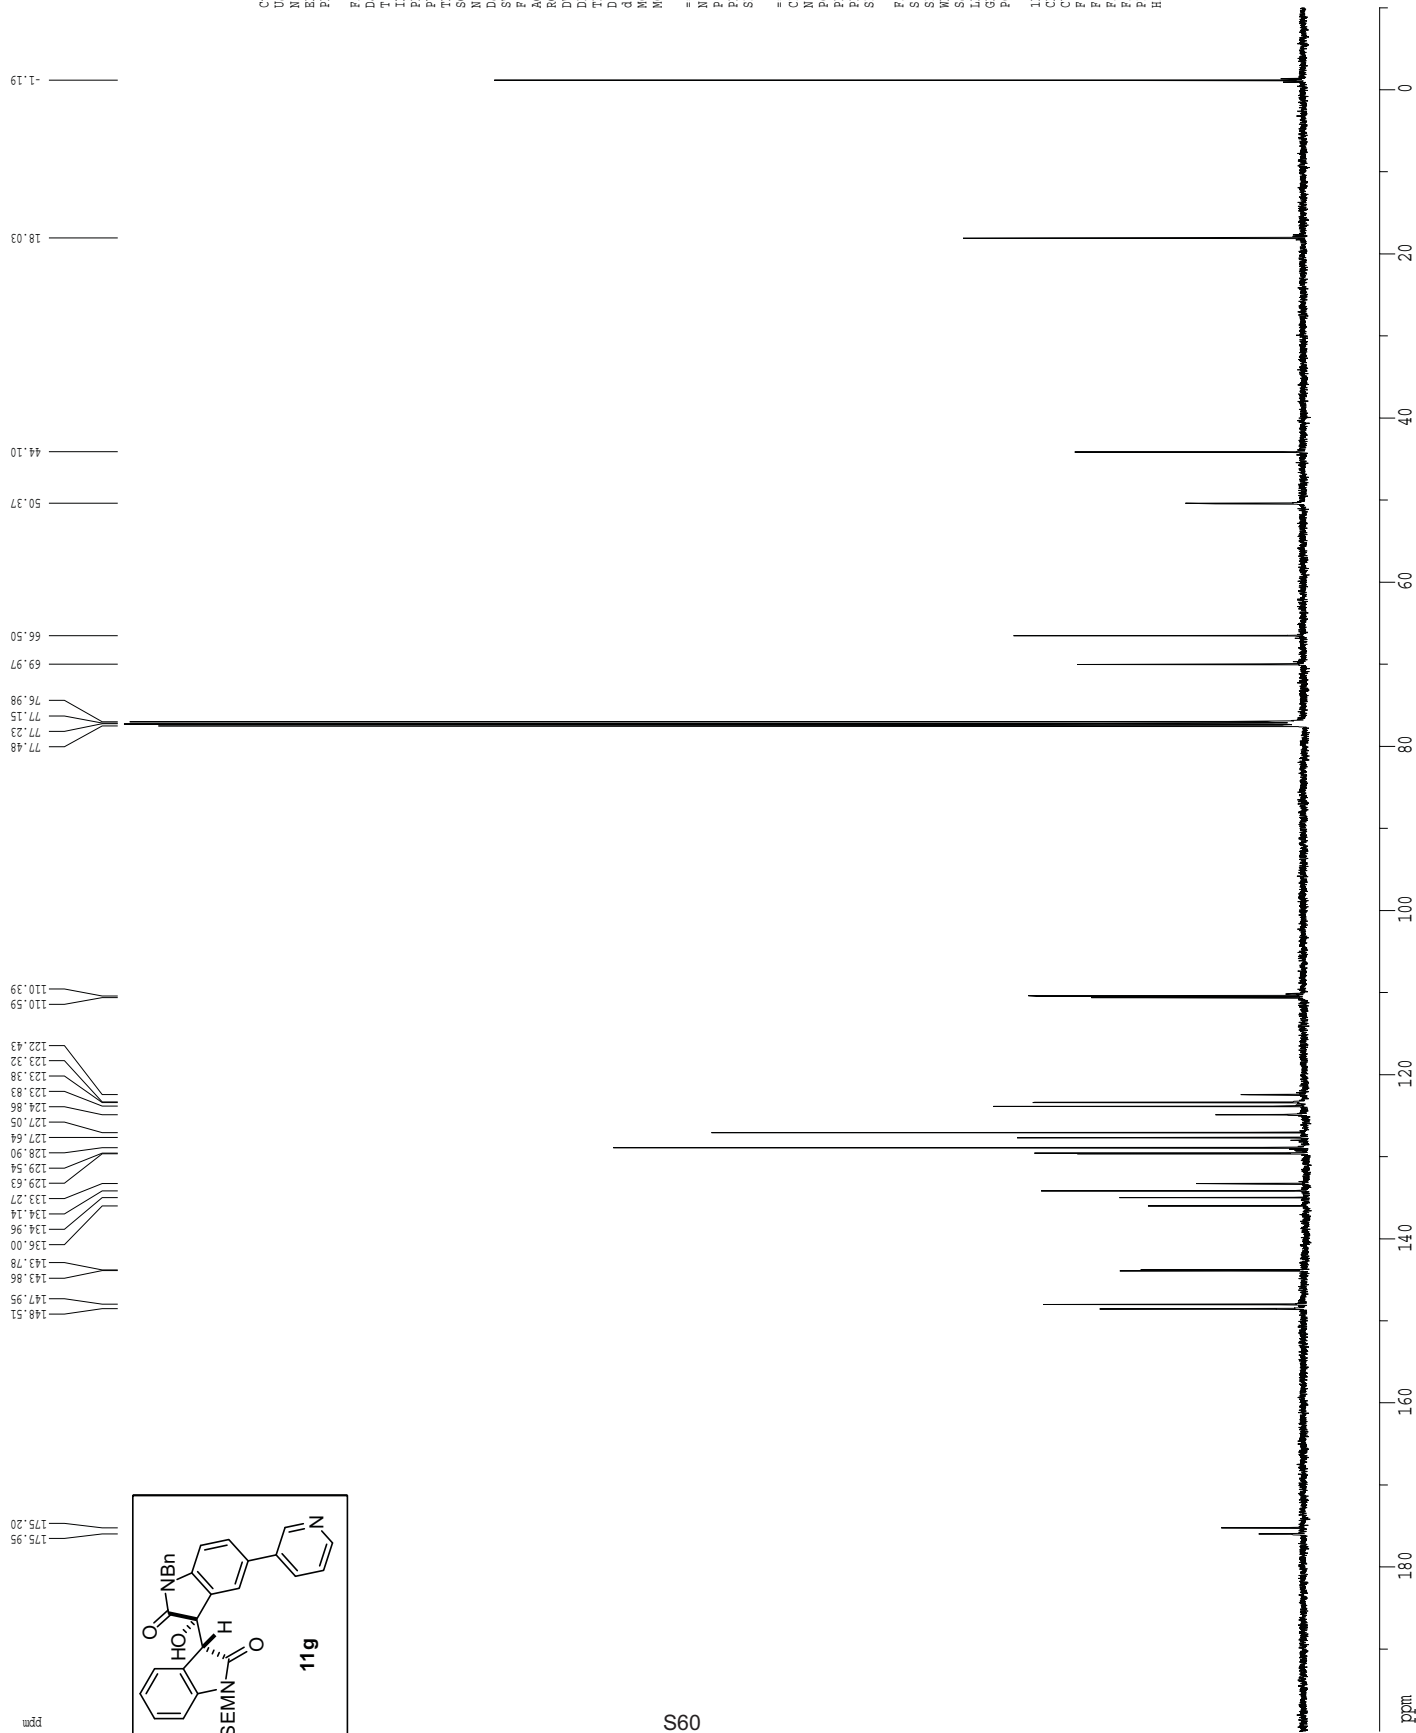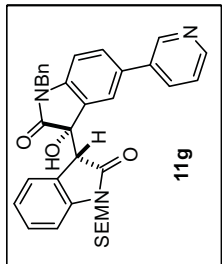

Current Data Parameters  
 USER mellis  
 NAME ME-1-114-eh  
 EXNO 3  
 PROCNO 1

F2 - Acquisition Parameters  
 Date 20080121  
 Time 9.18  
 INSTRUM cryo500  
 PROBHD 5 mm CPTCI LH-  
 PULPROG zgpg30  
 TD 65418  
 SOLVENT CCl3  
 NS 231  
 DS 4  
 SWH 30303.031 Hz  
 FIDRES 0.463222 Hz  
 AQ 1.078470 sec  
 RG 11585.2  
 DW 16.500 usec  
 DE 6.00 usec  
 TE 298.0 K  
 D1 0.25000000 sec  
 d11 0.03000000 sec  
 MCREST 0.00000000 sec  
 MCREK 0.01500000 sec

===== CHANNEL F1 =====  
 NUC1 <sup>13</sup>C  
 P1 15.00 usec  
 PL1 -1.00 dB  
 SF01 125.7942548 MHz

===== CHANNEL F2 =====  
 CPDPRG2 waltz16  
 NUC2 <sup>1</sup>H  
 P2 100.00 usec  
 PL2 1.60 dB  
 PL12 23.54 dB  
 SF02 500.2225011 MHz

F2 - Processing parameters  
 SI 65536  
 SF 125.7804039 MHz  
 WDW EM  
 SSB 0  
 GB 0  
 LB 1.00 Hz  
 GB 0  
 PC 2.00

1D NMR plot parameters  
 AX 2.00 cm  
 CY 15.00 cm  
 F1P 200.000 ppm  
 F1 25156.08 Hz  
 F2P -10.000 ppm  
 F2 -1257.86 Hz  
 PRMCN 9.21053 ppm/cm  
 HZCN 1188.50366 Hz/cm

ME 1-83  
1H spectrum

ppm

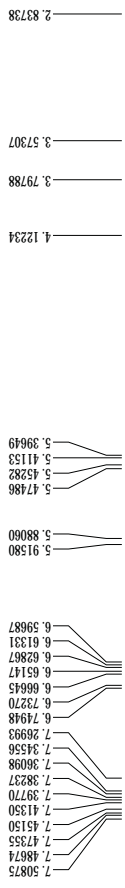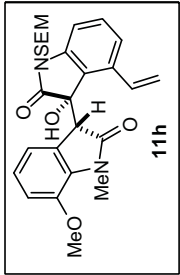

Current Data Parameters  
 USER mel1s  
 XNAME ME 1-83-ch  
 EXPNO 1  
 PROCNO 1

F2 - Acquisition Parameters  
 Date\_ 20080118  
 Time 8:44  
 INSTRUM spect  
 PROBRD 5 mm CPYCI-IL  
 PULPROG zg30  
 TD 6730  
 FIDRES 0.09843 Hz  
 AQ 5.089874 sec  
 RG 6.3  
 DW 62.400 usec  
 DE 6.00 usec  
 TE 300.2 K  
 D1 0.1000000 sec  
 D2 0.0000000 sec  
 MPROG 0.0000000 sec  
 MTRNK 0.01500000 sec

==== CHANNEL f1 =====  
 NUC1 1H  
 P1 8.00 usec  
 PL1 1.60 dB  
 SF01 500.225015 MHz

F2 - Processing parameters  
 SI 6539  
 SF 500.220258 MHz  
 IN 10  
 SSB 0  
 LB 0.30 Hz  
 GB 0  
 PC 4.00

ID MR plot parameters  
 CX 22.80 cm  
 CY 15.00 cm  
 FIP 9.000 ppm  
 FI 4501.98 Hz  
 F2 -1.000 ppm  
 F2 -300.22 Hz  
 F2ACQ 0.43860 ppm/cm  
 F2ZCN 219.39476 Hz/cm

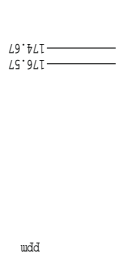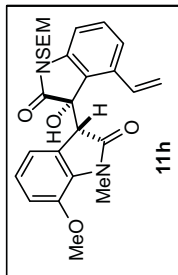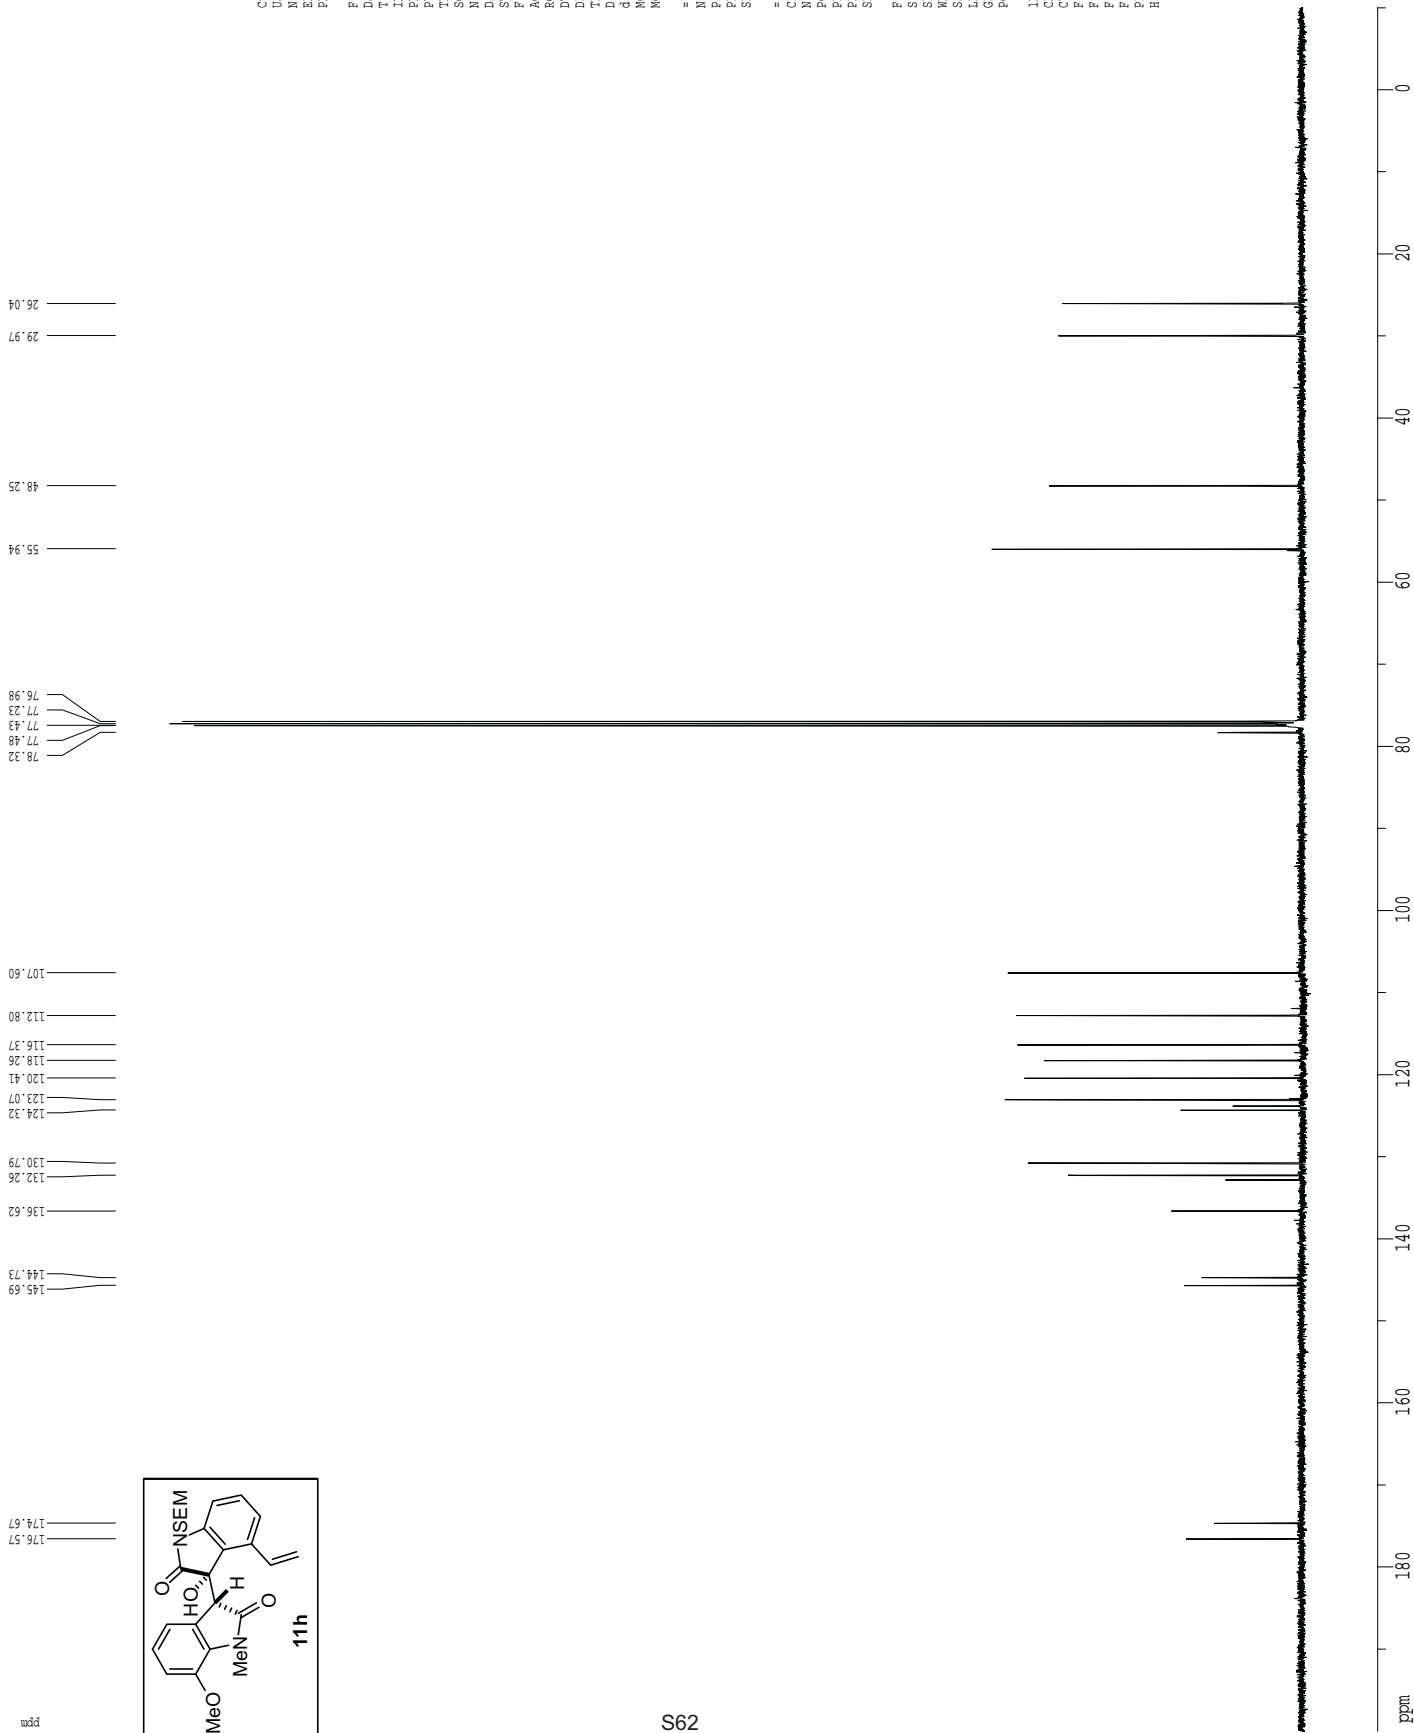

Current Data Parameters  
 USER mellis  
 NAME ME I-85-ch  
 EXNO 4  
 PROCNO 1

F2 - Acquisition Parameters  
 Date\_ 20080118  
 Time 8.50  
 INSTRUM cryo-500  
 PROBHD 5 mm CP1CI 1H-  
 PULPROG zgpg30  
 TD 65418  
 SOLVENT CCl13  
 NS 345  
 DS 4  
 SWH 30303.031 Hz  
 FIDRES 0.463222 Hz  
 AQ 1.0794476 sec  
 RG 8192  
 DW 16.500 usec  
 DE 6.00 usec  
 TE 298.0 K  
 D1 0.25000000 sec  
 d11 0.03000000 sec  
 MCREST 0.00000000 sec  
 MCREK 0.01500000 sec

===== CHANNEL F1 =====  
 NUCL1 13C  
 P1 15.00 usec  
 PL1 -1.00 dB  
 SFO1 125.7942548 MHz

===== CHANNEL F2 =====  
 CPDPRG2 waltz16  
 NUCL2 1H  
 P2 100.00 usec  
 PL2 1.60 dB  
 PL12 23.54 dB  
 SFO2 500.2225011 MHz

F2 - Processing parameters  
 SI 65536  
 SF 125.7804011 MHz  
 WDW EM  
 SSB 0  
 LB 1.00 Hz  
 GB 0  
 PC 1.00

1D NMR plot parameters  
 AX 220 cm  
 CX 15.00 cm  
 F1 200.000 ppm  
 F1 25156.08 Hz  
 F2 10.000 ppm  
 F2 -1257.80 Hz  
 PRMCM 9.21053 ppm/cm  
 HZCM 1188.50366 Hz/cm

**<sup>1</sup>H spectrum**

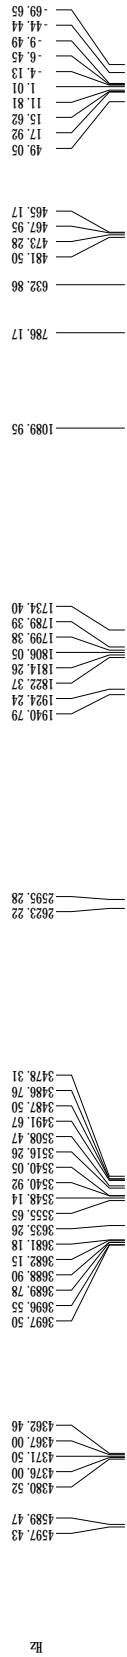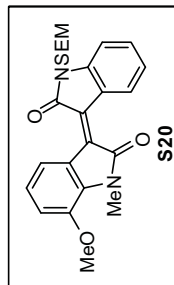

Current Data Parameters  
 USER melis  
 NAME sa-1-62  
 EXPNO 1  
 PROCNO 1

F2 - Acquisition Parameters  
 Date\_ 20051210  
 Time 11.48  
 INSTRUM spect  
 PULPROG 5 mm broadsol  
 TD 81728  
 SOLVENT CDCl3  
 NS 8  
 DS 2  
 SWH 8012.820 Hz  
 FIDRES 0.098043 Hz  
 AQ 5.0998774 sec  
 RG 256  
 DM 62.400 usec  
 DE 6.00 usec  
 TE 298.0 K  
 ACQPRG 0.1000000 sec  
 MPROB 0.0000000 sec  
 MTRK 0.01500000 sec

===== CHANNEL f1 =====  
 NUC1 1H  
 P1 11.50 usec  
 PL1 -3.00 dB  
 SF01 500.0435003 MHz

F2 - Processing parameter  
 SI 65536  
 SF 500.0400271 MHz  
 DN  
 LB 0.30 Hz  
 GB 0  
 PC 4.00

ID NMW plot parameters  
 CX 22.80 cm  
 CY 15.00 cm  
 FIP 10.000 ppm  
 F1 5000.40 Hz  
 F2 -1.000 ppm  
 FZ -500.04 Hz  
 PPMCM 0.48296 ppm/cm  
 HZCM 241.24739 Hz/cm

**<sup>13</sup>C spectrum with <sup>1</sup>H decoupling**

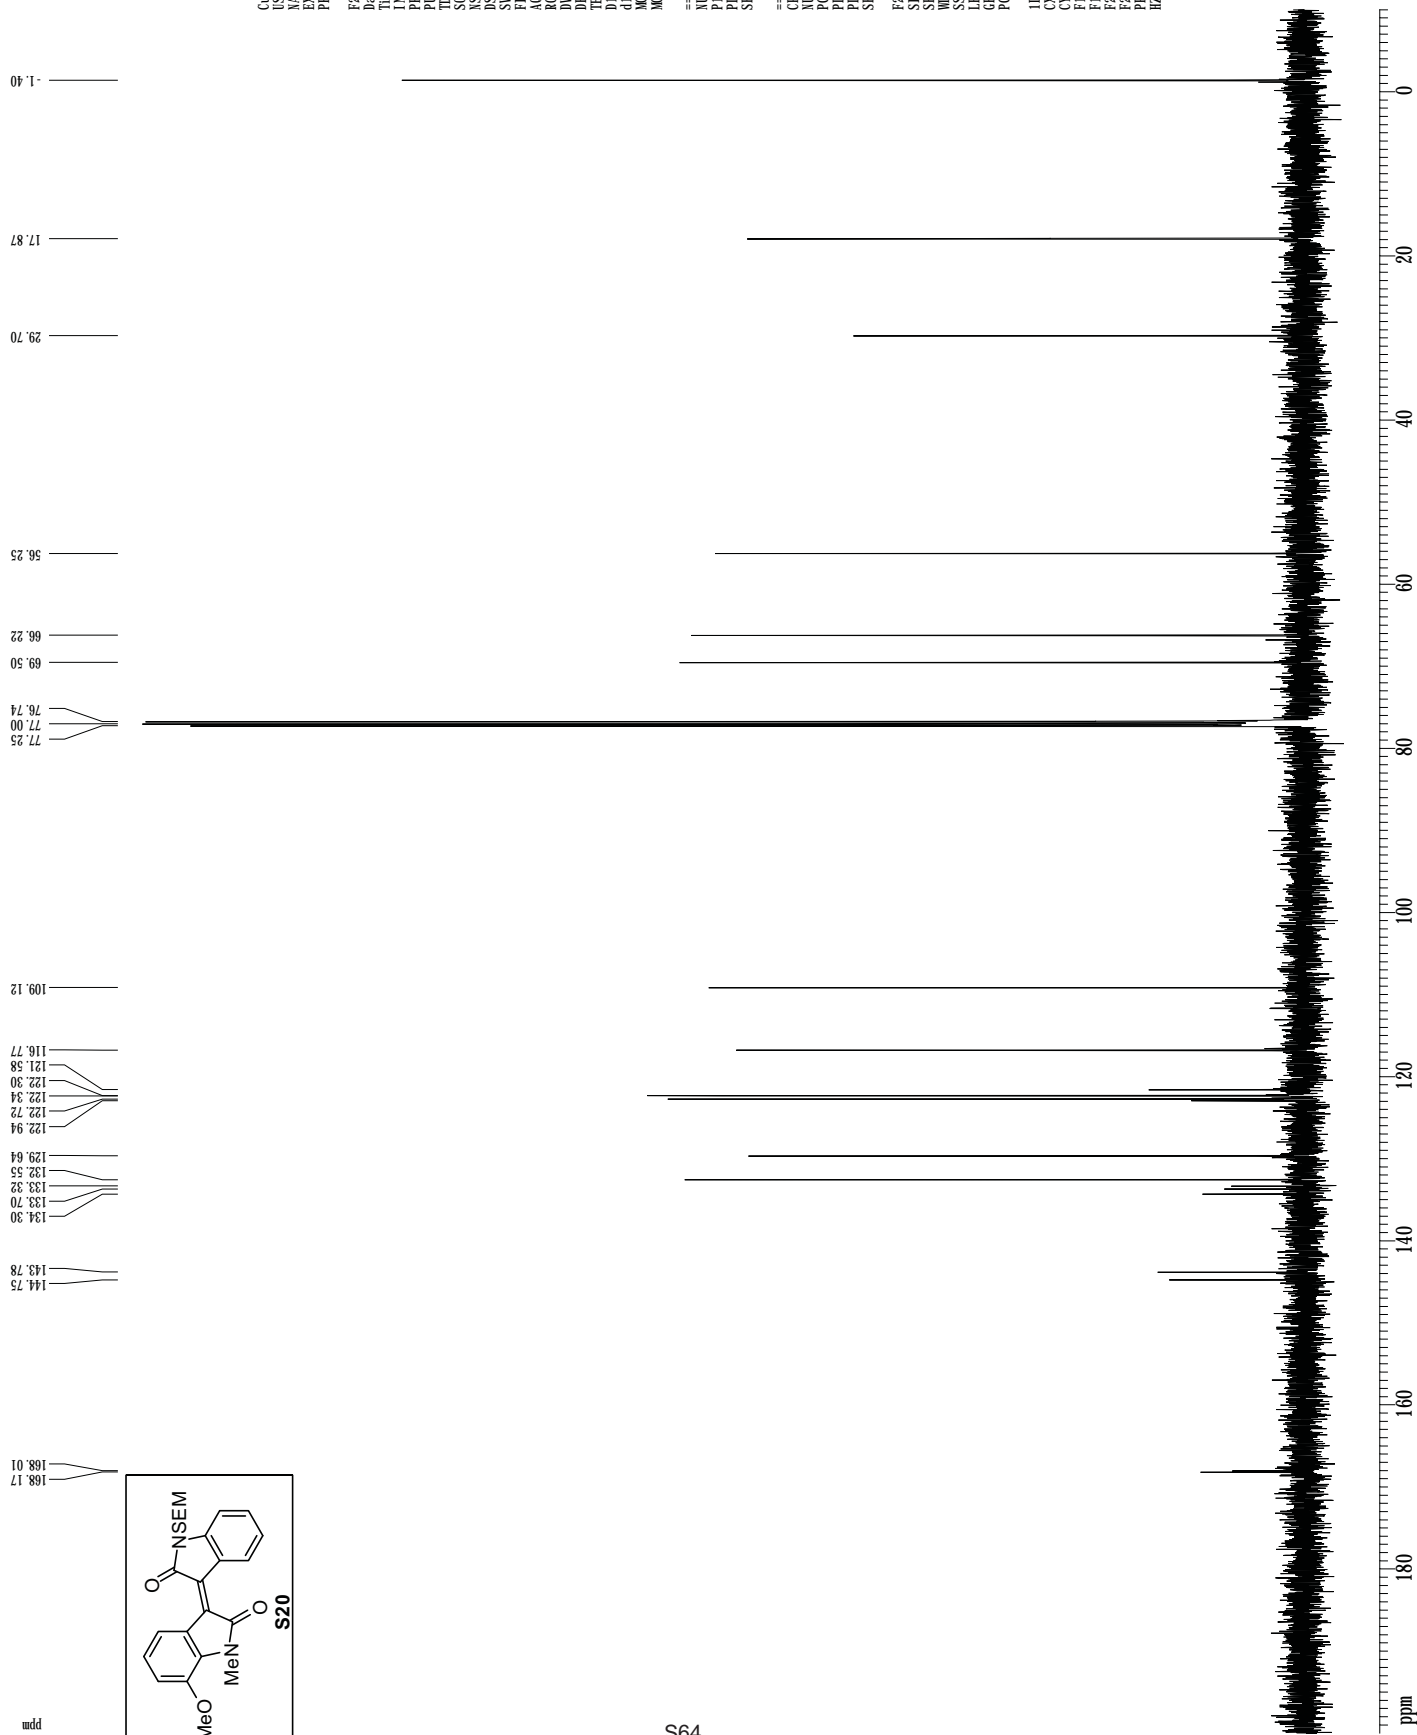

```

Current Data Parameters
USER      mellis
NAME      sta-1-62
EXPNO    2
PROCNO   1

F2 - Acquisition Parameters
Date_    20081210
Time     11.52
INSTRUM  spect
PROBHD   5 mm broadband
PULPROG  zgpg30
ID       6536
SOLVENT  CDCl3
NS       702
DS       4
SWH      30093.081 Hz
FIDRES   0.462888 Hz
AQ       1.0813940 sec
RG       8192
DW       16.500 usec
DE       4.50 usec
TE       298.0 K
d1       0.2500000 sec
d11      0.0300000 sec
d12      0.0000000 sec
d13      0.0000000 sec
d14      0.0000000 sec
d15      0.0000000 sec
MCYCLE   0.0150000 sec

===== CHANNEL f1 =====
NUC1      13C
P1       13.00 usec
PL1      0.00 dB
SFO1     125.7469386 MHz

===== CHANNEL f2 =====
CPDPRG2  waltz16
NUC2      1H
P2       80.00 usec
PL2      -3.00 dB
PL12     15.40 dB
SFO2     500.0425002 MHz

F2 - Processing parameter
SI       65536
SF       125.7351680 MHz
EN       0
WDW      0
SSB      0
LB       1.00 Hz
GB       0
PC       2.00

ID_NMR   plot parameters
CY       22.80 cm
CX       15.85 cm
E1P      200.000 ppm
F1       25147.03 Hz
F2P      -10.000 ppm
F2       -1257.35 Hz
PP4MCM   9.21053 ppm/cm
HZCM     1158.08704 Hz/cm
    
```

<sup>1</sup>H spectrum

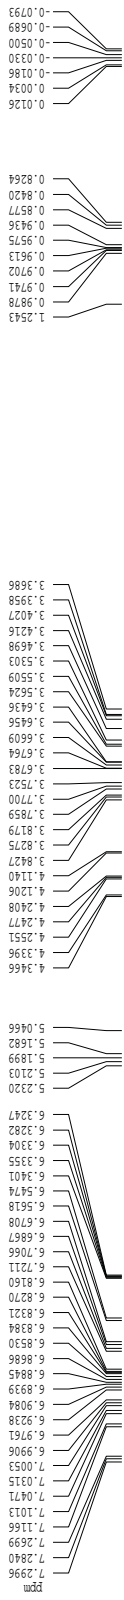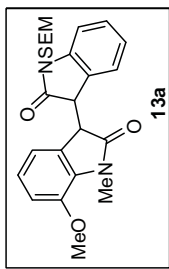

Current Data Parameter  
 USER mel1is  
 NAME ME-1-285-4h  
 EXPR0 1  
 PROCNO 1

F2 - Acquisition Parameters  
 Date\_ 20080811  
 Time 10.22  
 INSTR01 9H500  
 PULPROG 5 mm broadband  
 F4PR0G zgpg30  
 TD 81728  
 S0LVENT DMSO  
 NS 8  
 DS 2  
 SWH 8012.820 Hz  
 FIDRES 0.098043 Hz  
 AQ 5.0999398 sec  
 RG 45.3  
 DW 62.400 usec  
 DE 6.00 usec  
 TE 298.0 K  
 DL 0.1000000 sec  
 ACQST 0.0000000 sec  
 MCWK 0.0150000 sec

===== CHANNEL f1 =====  
 NUC1 1H  
 P1 12.00 usec  
 PL -3.00 dB  
 SFO1 499.7234980 MHz

F2 - Processing parameter  
 SI 65536  
 SF 499.7200261 MHz  
 EN  
 SSB 0  
 LB 0.70 Hz  
 GB 0  
 CB 1.00

1D NMR plot parameters  
 CX 22.80 cm  
 CY 15.00 cm  
 FIP 8.000 ppm  
 F1 3997.76 Hz  
 F2P -1.000 ppm  
 F2 -499.72 Hz  
 FWHM 0.39474 ppm/cm  
 HZCN 197.25752 Hz/cm

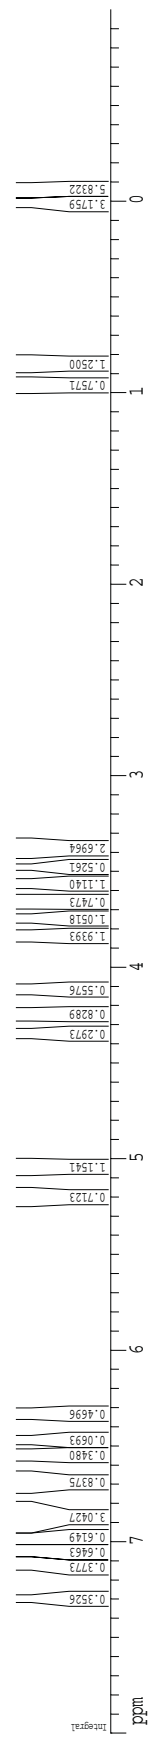

<sup>13</sup>C spectrum with <sup>1</sup>H decoupling

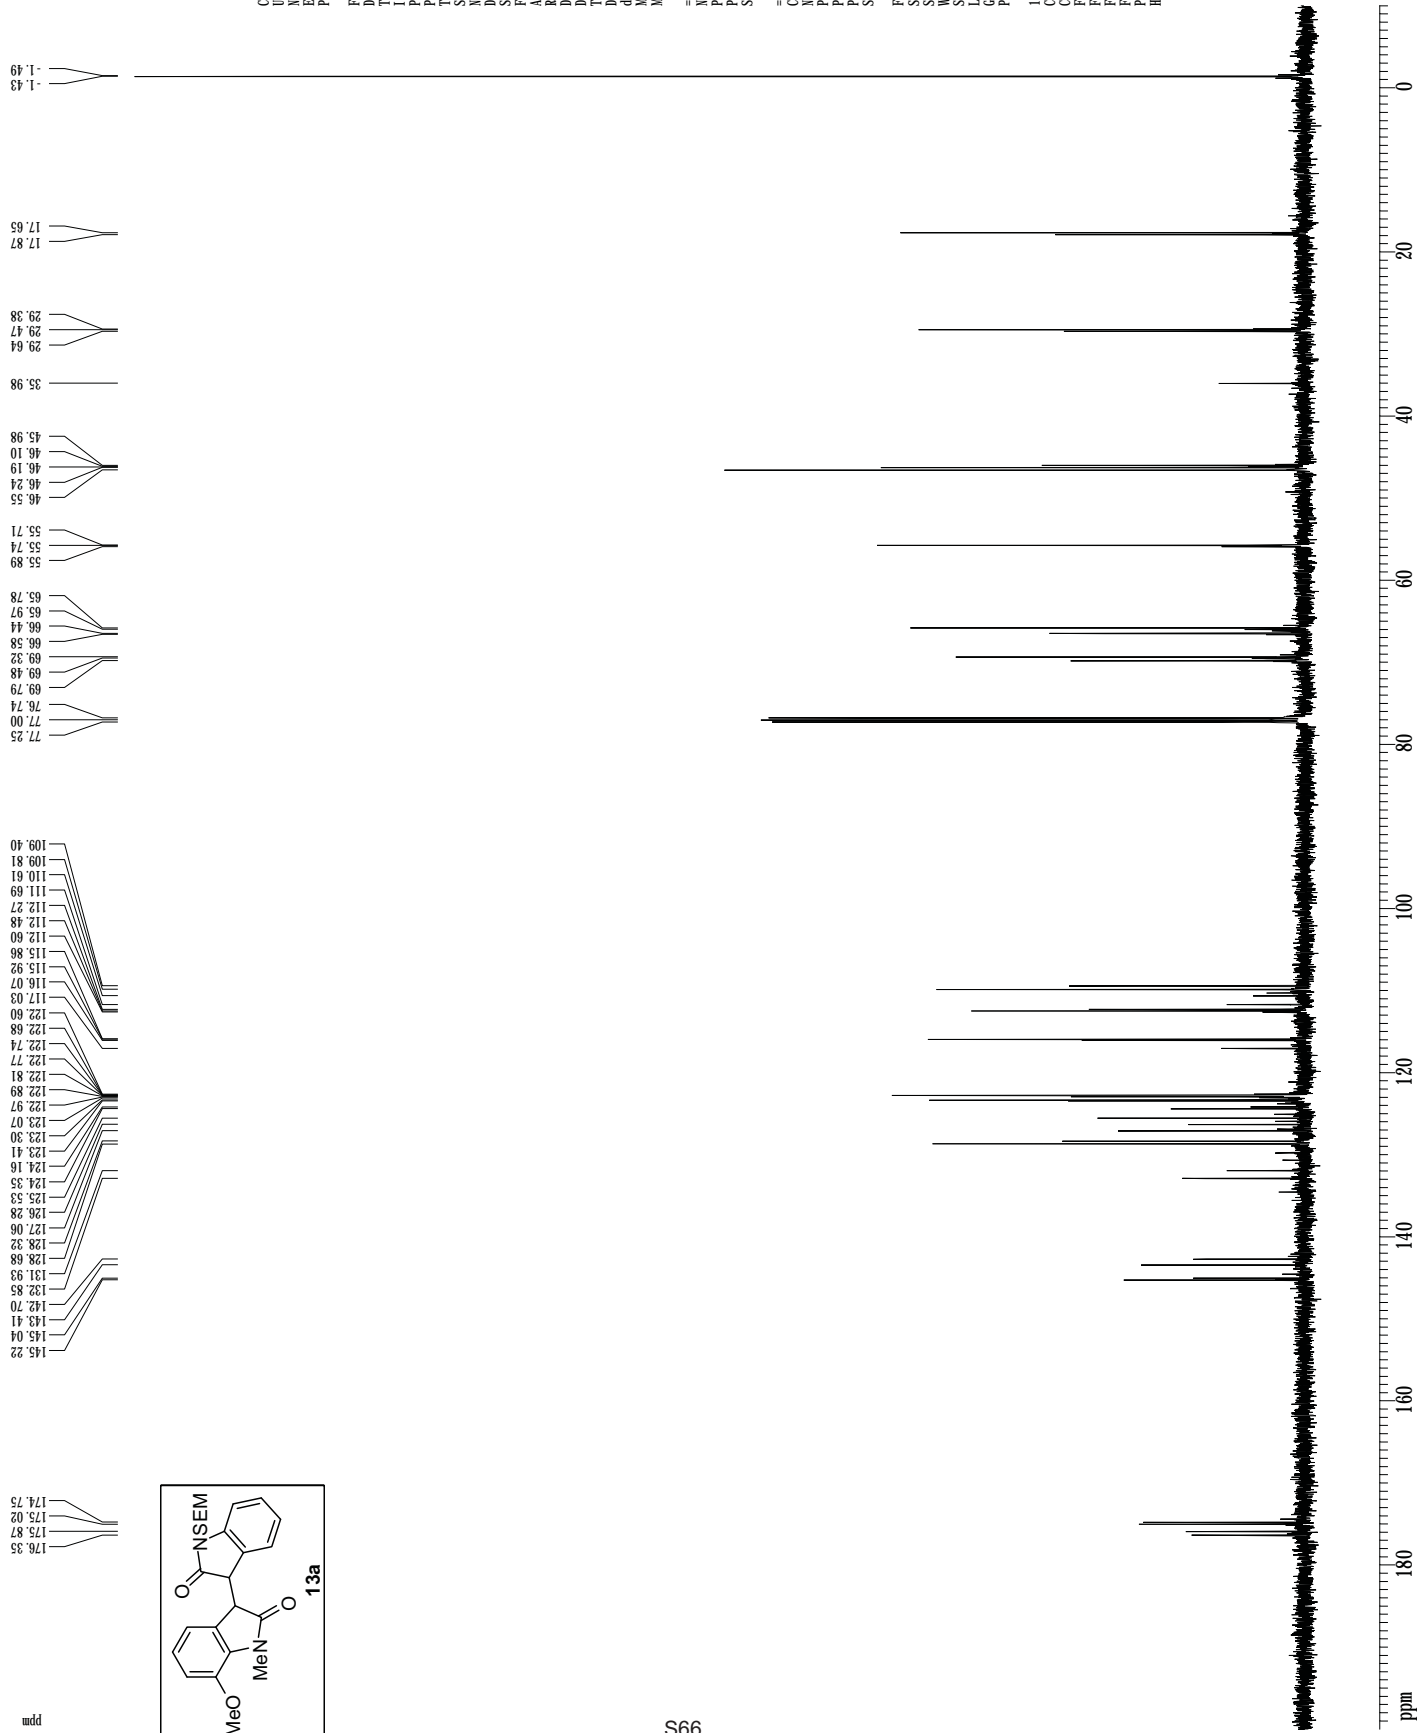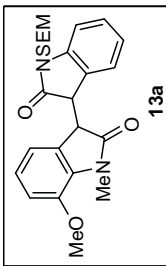

Current Data Parameters  
 USER mel1is  
 NAME ME-L-285-ch  
 EXPNO 4  
 PROCNO 1

F2 - Acquisition Parameters  
 Date\_ 20080812  
 Time 8.03  
 INSTRUM gn500  
 PROBHD 5 mm broadband  
 PULPROG zgpg30  
 ID 6536  
 SOLVENT CDCl3  
 NS 370  
 DS 4  
 SWH 30093.081 Hz  
 FIDRES 0.46288 Hz  
 AQ 1.0813940 sec  
 RG 3251  
 DW 16.500 usec  
 DE 4.50 usec  
 TE 298.0 K  
 D1 0.2500000 sec  
 d11 0.0300000 sec  
 MCREST 0.0000000 sec  
 MCYCLE 0.0150000 sec

===== CHANNEL f1 =====  
 NUC1 <sup>13</sup>C  
 P1 7.08 usec  
 PL1 0.00 dB  
 SFO1 125.6681160 MHz

===== CHANNEL f2 =====  
 CPDPRG2 waltz16  
 NUC2 <sup>1</sup>H  
 P2 80.00 usec  
 PL2 -3.00 dB  
 PL12 14.70 dB  
 SFO2 499.7224986 MHz

F2 - Processing parameter  
 SI 65536  
 SF 125.6811130 MHz  
 WDW EM  
 EN 0  
 LB 1.00 Hz  
 GB 0  
 PC 2.00

ID AMP plot parameters  
 CX 22.80 cm  
 CY 15.85 cm  
 ETP 200.000 ppm  
 F1 25136.22 Hz  
 F2 -10.000 ppm  
 FZ -1256.81 Hz  
 PPKCM 9.21053 ppm/cm  
 HZCM 1157.5811 Hz/cm

<sup>1</sup>H spectrum

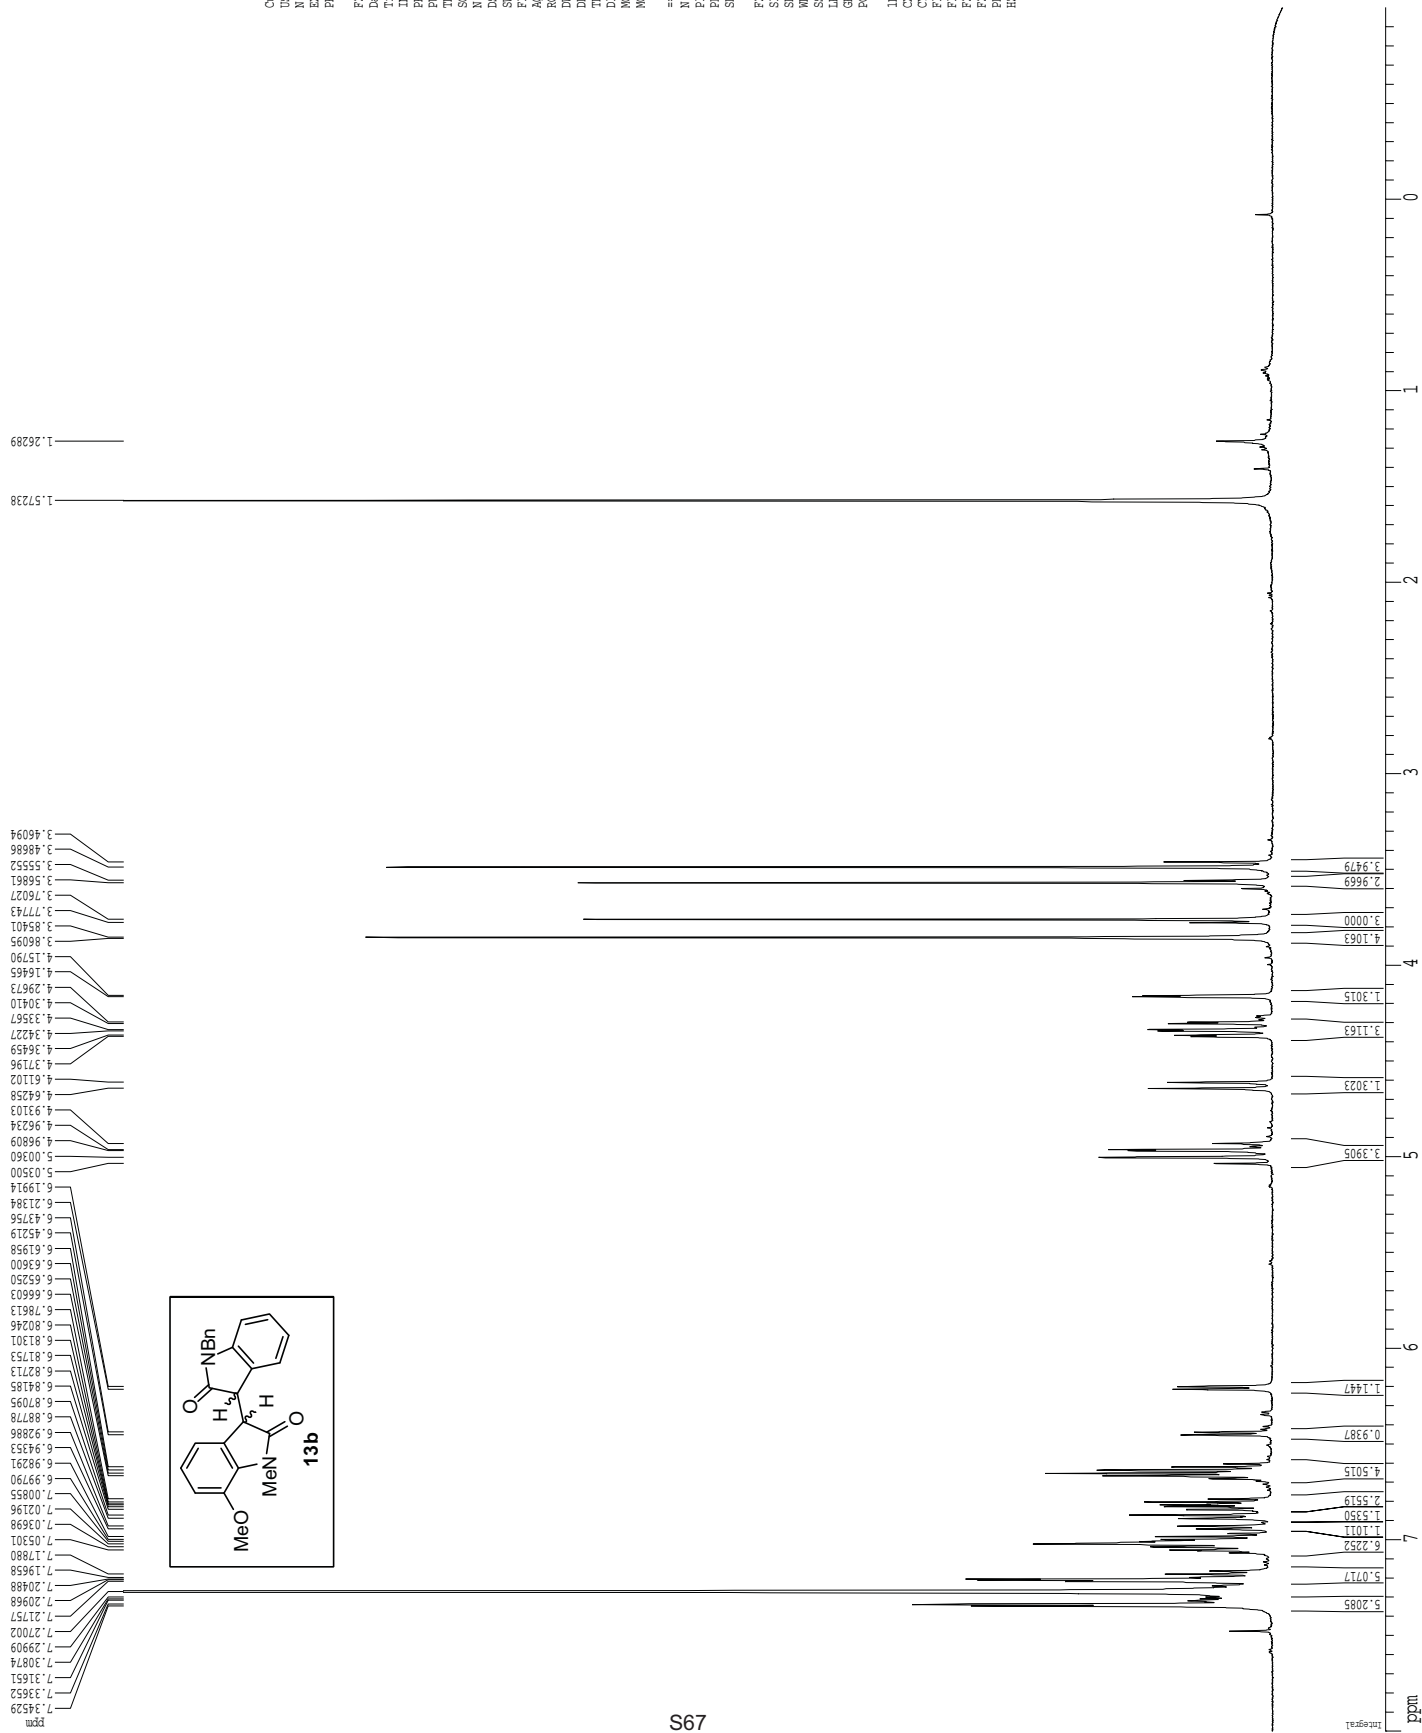

Current Data Parameters  
 USER: fowang  
 NAME: JM-1-252prod  
 EXPNO: 3  
 PROCNO: 1

F2 - Acquisition Parameters  
 Date\_: 2008/02/5  
 Time: 21.10  
 INSTRUM: cryso50  
 PROBHD: 5 mm CPXI JF-  
 P1PRG: zgpg30  
 TO: 8178  
 SOLVENT: CDCl3  
 NS: 16  
 DS: 2  
 SWH: 8012.820 Hz  
 FIDRES: 0.098643 Hz  
 AQ: 5.098774 sec  
 RG: 5.7  
 DW: 62.400 usec  
 DE: 6.00 usec  
 TE: 298.0 K  
 D1: 0.1000000 sec  
 ACQRES1: 0.0000000 sec  
 ACQRES: 0.0150000 sec

\*\*\*\*\* CHANNEL f1 \*\*\*\*\*  
 NUC1: <sup>1</sup>H  
 P1: 8.00 usec  
 PL1: 1.60 dB  
 SFO1: 500.2235015 MHz

F2 - Processing parameters  
 SI: 65536  
 SF: 500.220259 MHz  
 WDW: EM  
 SSB: 0  
 AB: 0  
 GB: 0  
 PC: 4.00

ID NMR plot parameters  
 CX: 22.80 cm  
 CY: 91.14 cm  
 FIP: 8.000 ppm  
 F1: 4001.76 Hz  
 F2P: -1.000 ppm  
 F2: -500.22 Hz  
 PPM0: 0.39474 ppm/cm  
 HZ0: 197.45528 Hz/cm



<sup>13</sup>C spectrum with <sup>1</sup>H decoupling

mdd

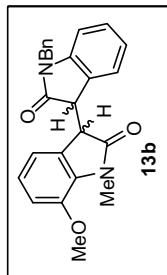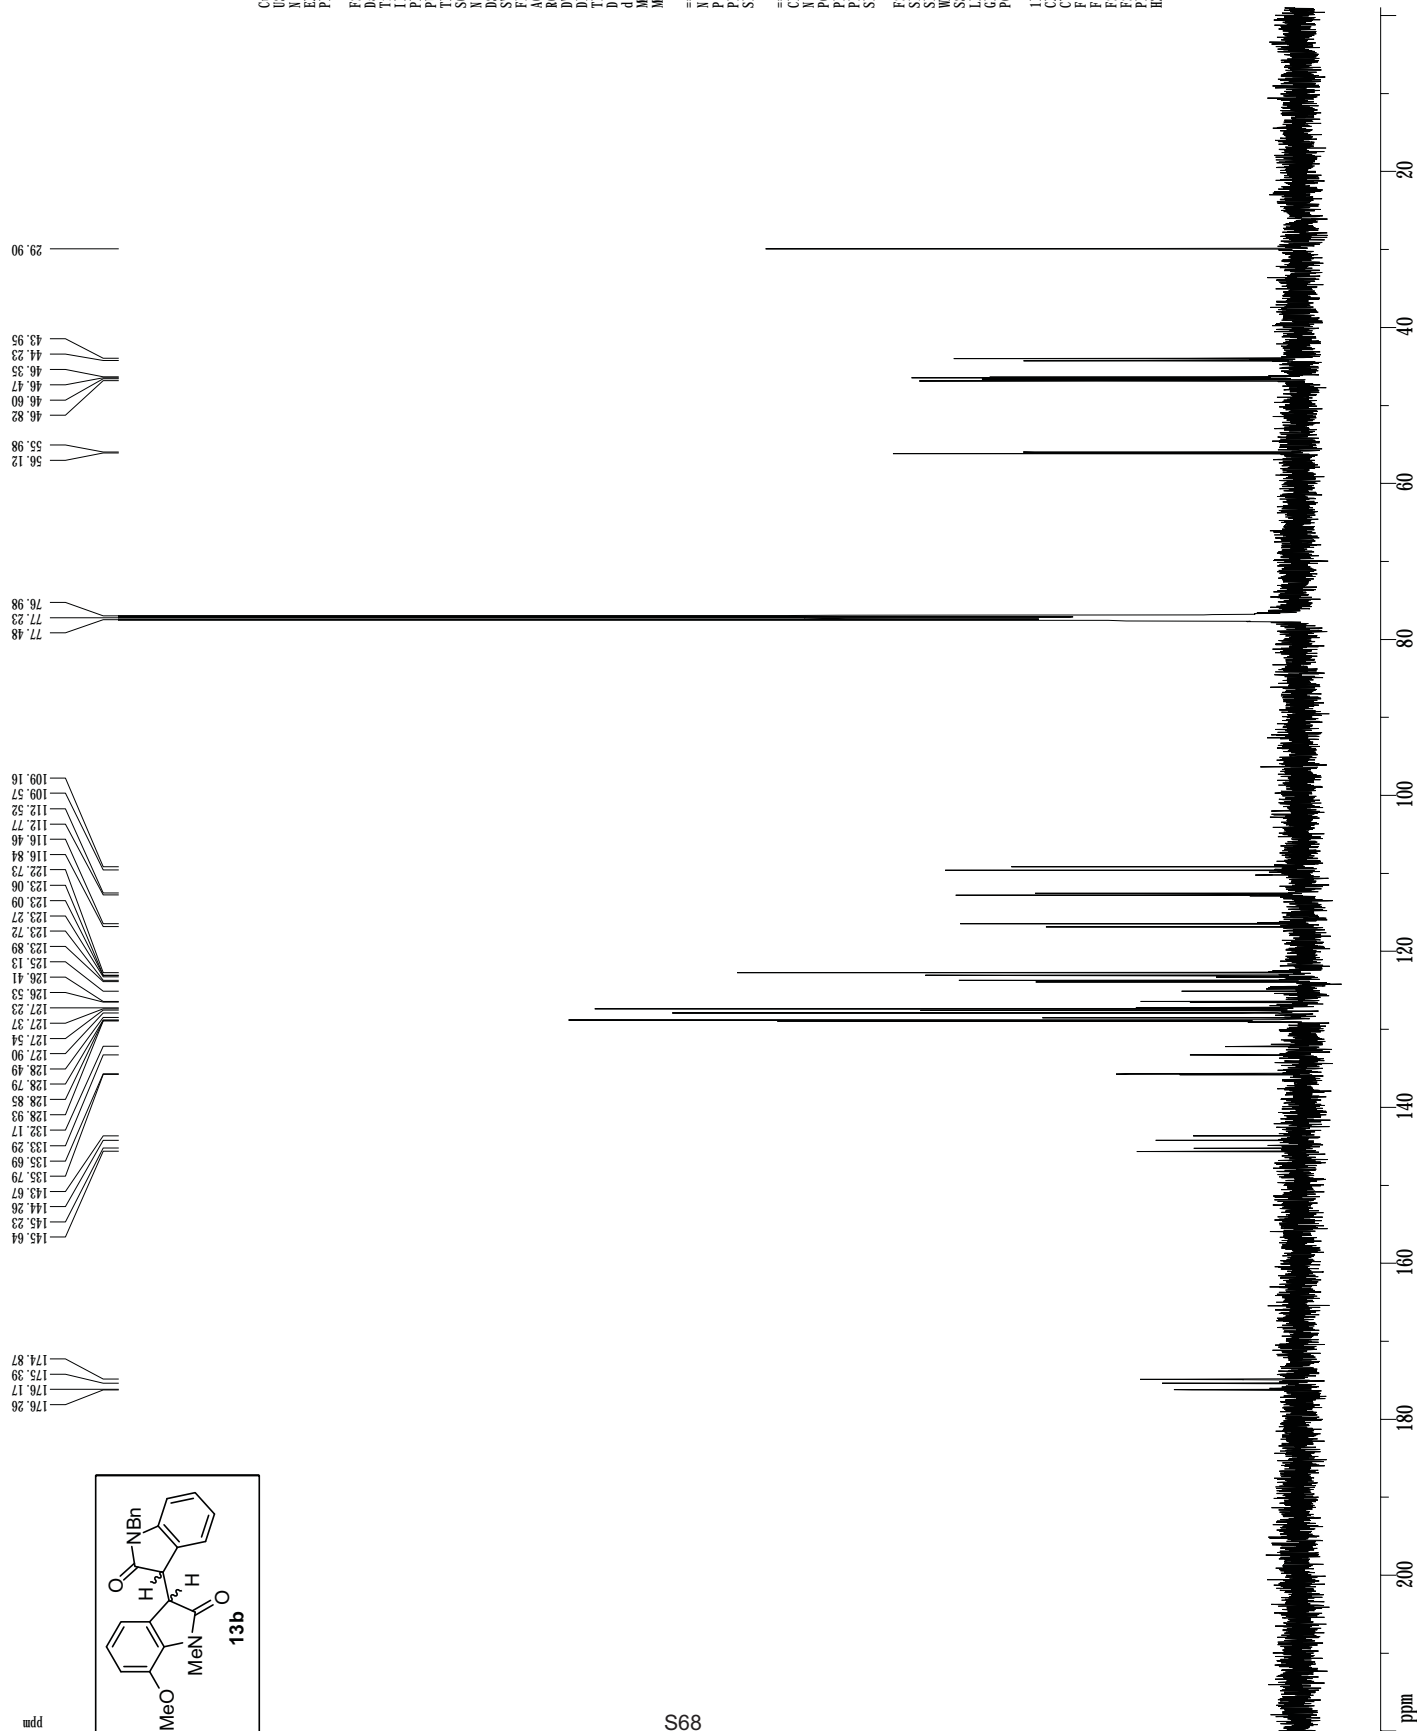

```

Current Data Parameters
=====
USER          Loweng
NAME          JW-1-252prod
EXPNO        109
PROCNO       1

F2 - Acquisition Parameters
=====
Date_         20080205
Time_        21.41
INSTRUM      cryo500
PROBHD       5 mm CPTCI IH
PULPROG      zgpg30
TD           65418
SOLVENT      CDCl3
NS           1675
DS           1
SWH          30303.031 Hz
FIDRES       0.463222 Hz
AQ           1.0794470 sec
RG           8192
DW           16.500 usec
DE           6.00 usec
TE           298.0 K
D1           0.25000000 sec
d11          0.03000000 sec
d12          0.00000000 sec
d13          0.01500000 sec
MCWRRK      0.01500000 sec

===== CHANNEL f1 =====
NUC1         13C
P1           15.00 usec
PL1          -1.00 dB
SFO1        125.76942546 MHz

===== CHANNEL f2 =====
CPDPRG2      mdd t2 t16
NUC2         1H
P2           100.00 usec
PL2          1.60 dB
PL12        23.54 dB
SFO2        500.2225011 MHz

F2 - Processing parameters
=====
SI           65536
SF          125.7803892 MHz
EM          0
WDW         EM
SSB         0
LB          1.00 Hz
GB          0
PC          2.00

ID_MW plot parameters
=====
CA          22.80 cm
CY          130.60 cm
CTIP        220.000 ppm
F1          27671.69 Hz
F2          -1.000 ppm
F3          -125.78 Hz
PP4M        9.66298 ppm/cm
HZCM        1219.18728 Hz/cm
    
```

1H spectrum

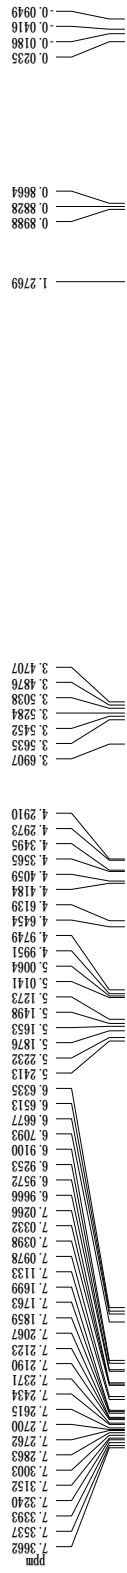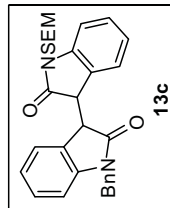

Current Data Parameters  
 USER mellics  
 NAME ME-1-274-ch  
 EXPNO 1  
 PROCNO 1

F2 - Acquisition Parameters  
 Date\_ 20080806  
 Time 8.34  
 INSTRUM spect  
 PULPROG zgpg30  
 TD 65536  
 SFO1 499.7234980 MHz  
 SOLVENT DMSO  
 NS 8  
 DS 2  
 SWH 8012.820 Hz  
 FIDRES 0.098043 Hz  
 AQ 5.0998398 sec  
 RG 64  
 DM 62.400 usec  
 DE 6.00 usec  
 TE 298.0 K  
 IC 0.1000000 sec  
 ACQ 0.0000000 sec  
 MTK 0.01500000 sec  
 ===== CHANNEL f1 =====  
 NUC1 1H  
 P1 12.00 usec  
 PL1 -3.00 dB  
 SFO1 499.7234980 MHz

F2 - Processing parameters  
 SI 65536  
 SF 499.720259 MHz  
 DN  
 LB 0.30 Hz  
 GB 0  
 CB 1.00

ID NM plot parameters  
 CX 22.80 cm  
 CY 15.00 cm  
 FIP 8.000 ppm  
 F1 3997.76 Hz  
 F2 -1.000 ppm  
 F3 -499.72 Hz  
 PPMCM 0.39474 ppm/cm  
 PZCM 197.25792 Hz/cm

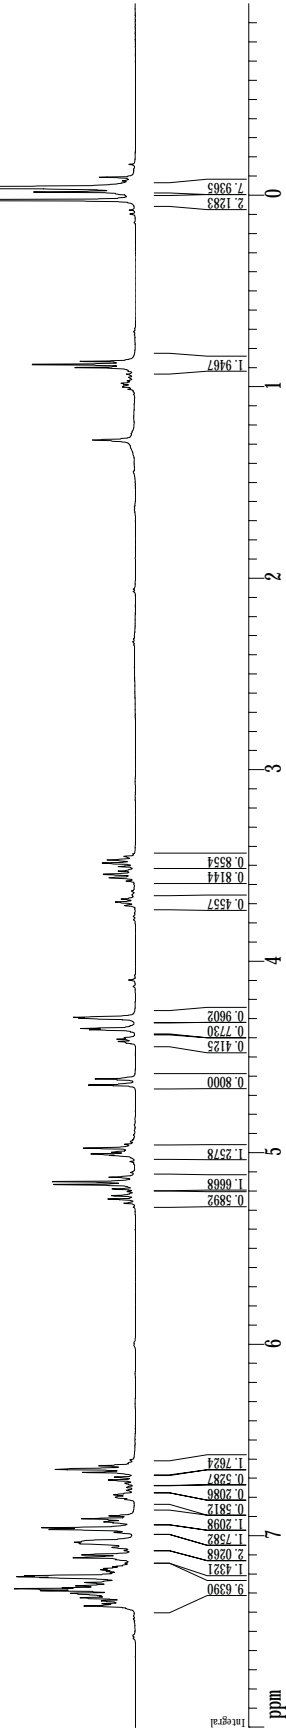

<sup>13</sup>C spectrum with <sup>1</sup>H decouplin

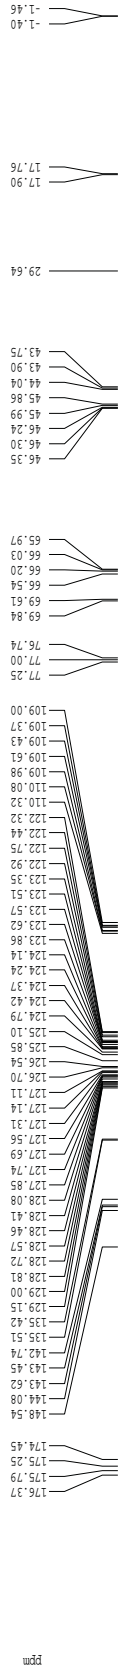

```

Current Data Parameters
USER      mellis
NAME      ME-1-274-ch
EXPTNO    2
PROCNO    1

F2 - Acquisition Parameters
Date_     20080806
Time      9.02
INSTRUM   gm500
PROBHD    5 mm broadband
PULPROG   zgpg30
TD         65536
SOLVENT   CDCl3
NS         451
DS         4
SWH        30003.001 Hz
FIDRES     0.462388 Hz
AQ         1.0814105 sec
RG         9195.2
DM         16.500 usec
DE         4.50 usec
TE         298.0 K
D1         0.25000000 sec
d11        0.03000000 sec
RCYCST    0.00000000 sec
MCYRST    0.01500000 sec

***** CHANNEL f1 *****
NUC1       13C
P1         7.08 usec
PL1        0.00 dB
SFO1      125.669160 MHz

***** CHANNEL f2 *****
CPDPRG2    waltz16
NUC2       1H
P2         80.00 usec
PL2        -3.00 dB
PL12       14.70 dB
SFO2      499.7224986 MHz

F2 - Processing parameter
S1         65536
SF         125.6547082 MHz
WDW        EM
SSB        0
LB         1.00 Hz
GB         0
PC         2.00

1D NMR plot parameters
CX         212.80 cm
CY         15.65 cm
ETP        200.000 ppm
F1         25130.84 Hz
F2         -10.000 ppm
FZ         -1256.55 Hz
PMAON     9.21053 ppm/cm
HZOOM     1157.34595 Hz/cm
    
```

**<sup>1</sup>H spectrum**

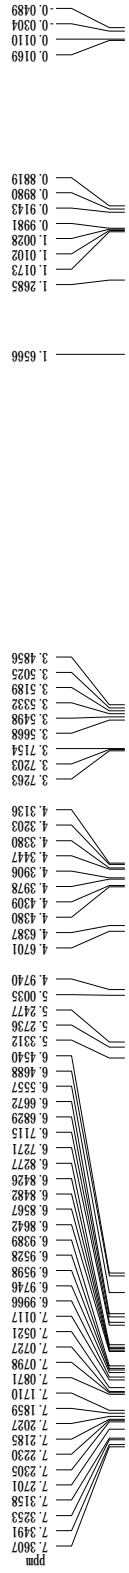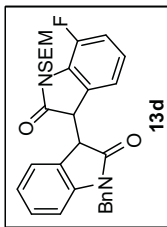

Current Data Parameters  
 USER mellis  
 NAME ME-1-200-ch  
 EXPNO 1  
 PROCNO 1

F2 - Acquisition Parameters  
 Date\_ 20080815  
 Time 9:33  
 INSTRUM spect  
 PULPROG zgpg30  
 TD 65536  
 SFO1 499.7234980 MHz  
 SOLVENT DMSO  
 NS 8  
 DS 2  
 SWH 8012.820 Hz  
 FIDRES 0.068043 Hz  
 AQ 5.0698398 sec  
 RG 101.6  
 DM 62.400 usec  
 DE 6.00 usec  
 TE 298.0 K  
 0.1000000 sec  
 0.0000000 sec  
 0.01500000 sec  
 MTRK 0.01500000 sec

===== CHANNEL f1 =====  
 NUC1 <sup>1</sup>H  
 P1 12.00 usec  
 PL1 -3.00 dB  
 SFO1 499.7234980 MHz

F2 - Processing parameters  
 SI 65536  
 SF 499.720262 MHz  
 DN  
 LB 0.30 Hz  
 GB 0  
 PC 1.00

ID NM plot parameters  
 CX 22.80 cm  
 CY 15.00 cm  
 FIP 8.000 ppm  
 F1 3997.76 Hz  
 F2 -1.000 ppm  
 -499.72 Hz  
 PPMCM 0.39474 ppm/cm  
 HZCM 197.25792 Hz/cm

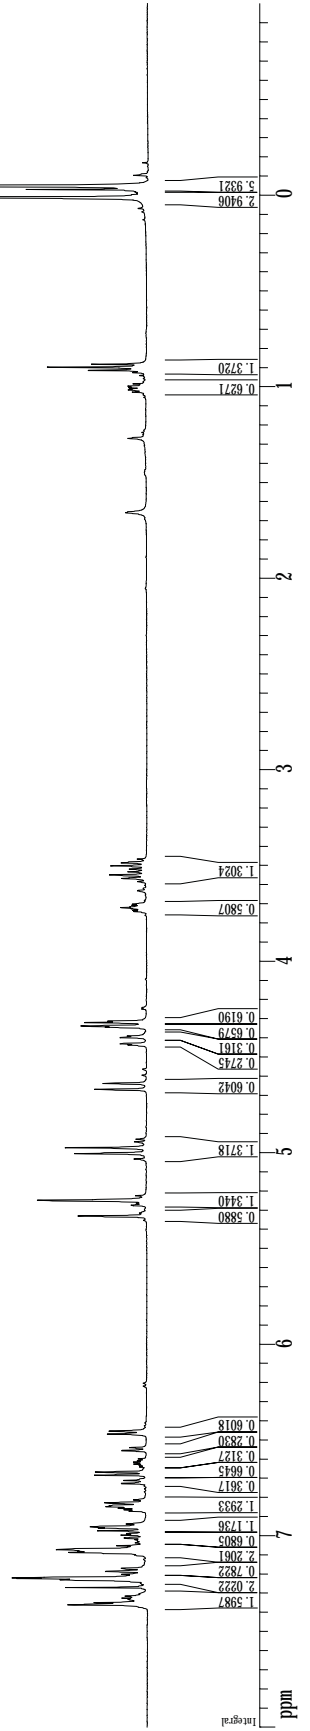

13C spectrum with 1H decouplin

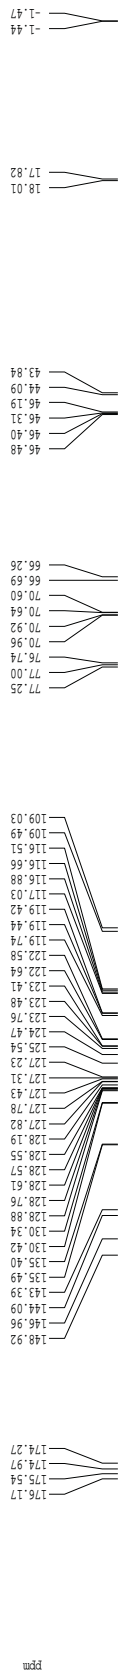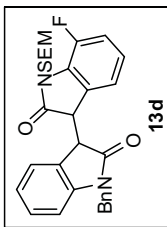

```

Current Data Parameters
USER      mellis
NAME      ME-1-250-eh
EXEVO     2
PROCNO    1

F2 - Acquisition Parameters
Date_     20080815
Time      9.54
INSTRUM   gm500
PROBHD    5 mm broadband
PULPROG   zgpg30
TD         65536
SOLVENT    CDCl3
NS         798
DS         4
SFO1       101.625131 MHz
SF2        300.1303031 MHz
AQ         0.462388 sec
RG         1.0834105 sec
DE         16.500 usec
TE         298.0 K
D1         0.25000000 sec
d11        0.03000000 sec
MCHRG1    0.00000000 sec
MCHRG2    0.01500000 sec

***** CHANNEL f1 *****
NUC1       13C
P1         7.08 usec
PL1        0.00 dB
SFO1       125.6695160 MHz

***** CHANNEL f2 *****
CPDPRG2    waltz16
NUC2       1H
P2         80.10 usec
PL2        -3.00 dB
PL12       14.70 dB
SFO2       499.7224986 MHz

F2 - Processing parameter
SI         65536
SF         125.6547041 MHz
WDW        EM
SSB        0
LB         1.00 Hz
GB         0
PC         2.00

1D NMR plot parameters
CX         22.80 cm
CY         15.65 cm
ETP        200.000 ppm
F1P        25130.84 Hz
F2P        -10.000 ppm
F2         -1256.55 Hz
FPMOVM    9.21053 ppm/cm
HZCM       1157.34595 Hz/cm
    
```



<sup>13</sup>C spectrum with <sup>1</sup>H decoupling

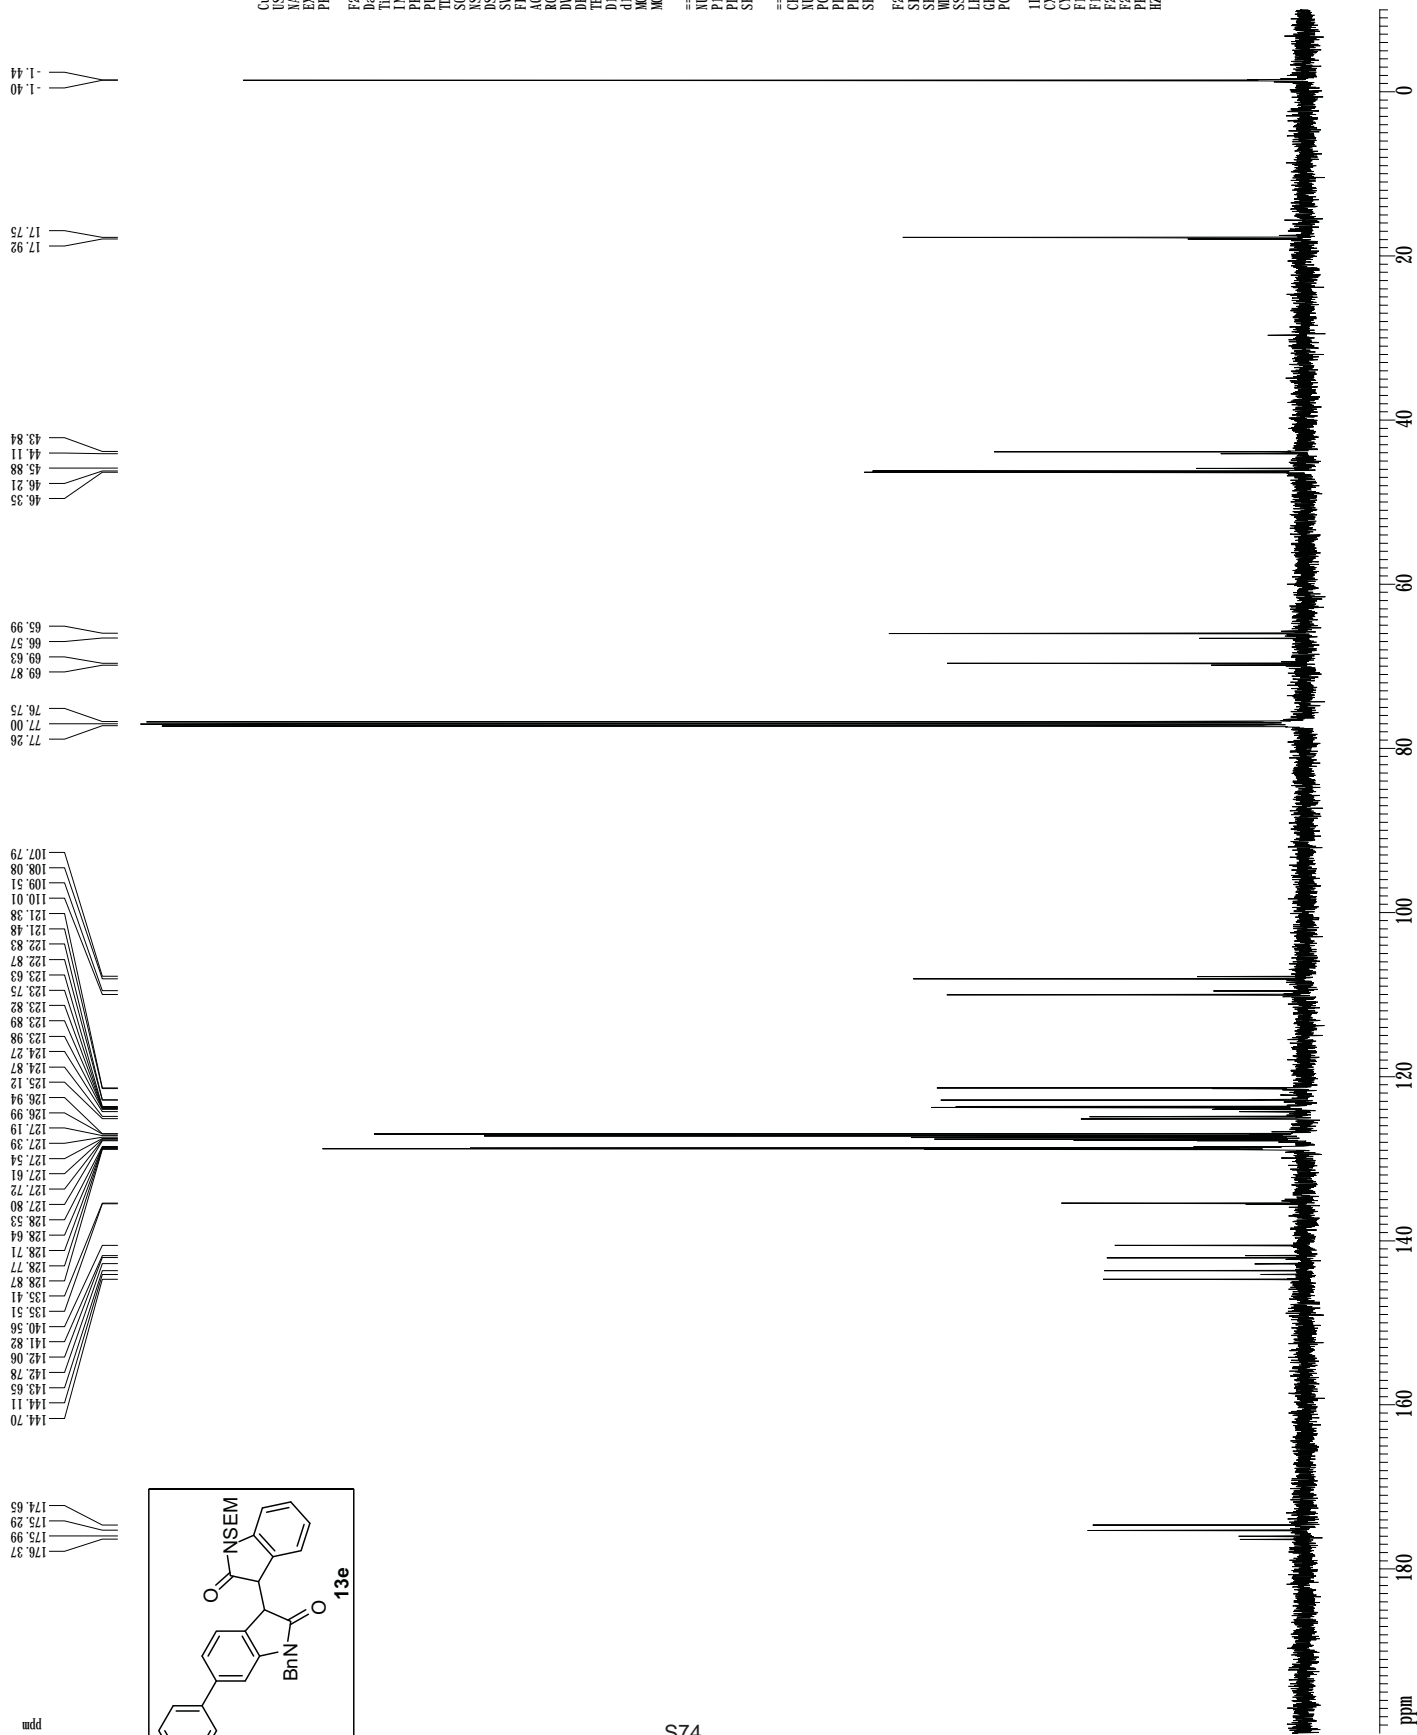

```

Current Data Parameters
USER      mellis
NAME      ME-L-280-ch
EXPNO     2
PROCNO    1

F2 - Acquisition Parameters
Date_     20080808
Time      8.55
INSTRUM   spect
PROBHD    5 mm broadband
PULPROG   zgpg30
ID        6536
SOLVENT   CDCl3
NS        641
DS        4
SWH        30093.031 Hz
FIDRES     0.462388 Hz
AQ         1.0814105 sec
RG         3251
DE         16.500 usec
TE         298.0 K
D1         0.2500000 sec
d11        0.0300000 sec
d111       0.0000000 sec
d112       0.0000000 sec
d113       0.0150000 sec
MCYRKA     0.0150000 sec

===== CHANNEL f1 =====
NUC1       13C
P1         7.08 usec
PL1        0.00 dB
SFO1       125.6681560 MHz

===== CHANNEL f2 =====
CPCPRG2    waltz16
NUC2       1H
PCPD2      80.00 usec
PL2         -3.00 dB
PL12       14.70 dB
SFO2       499.7224986 MHz

F2 - Processing parameter
SI         65536
SF         125.657064 MHz
WDW        EM
SSB        0
LB         1.00 Hz
GB         0
PC         2.00

ID_NMR plot parameters
CX         22.80 cm
CY         15.85 cm
E1P        200.000 ppm
F1P        25130.94 Hz
F2P        -10.000 ppm
F2         -1256.55 Hz
PP4M1      9.21053 ppm/cm
HZCM       1157.34585 Hz/cm
    
```

**<sup>1</sup>H spectrum**

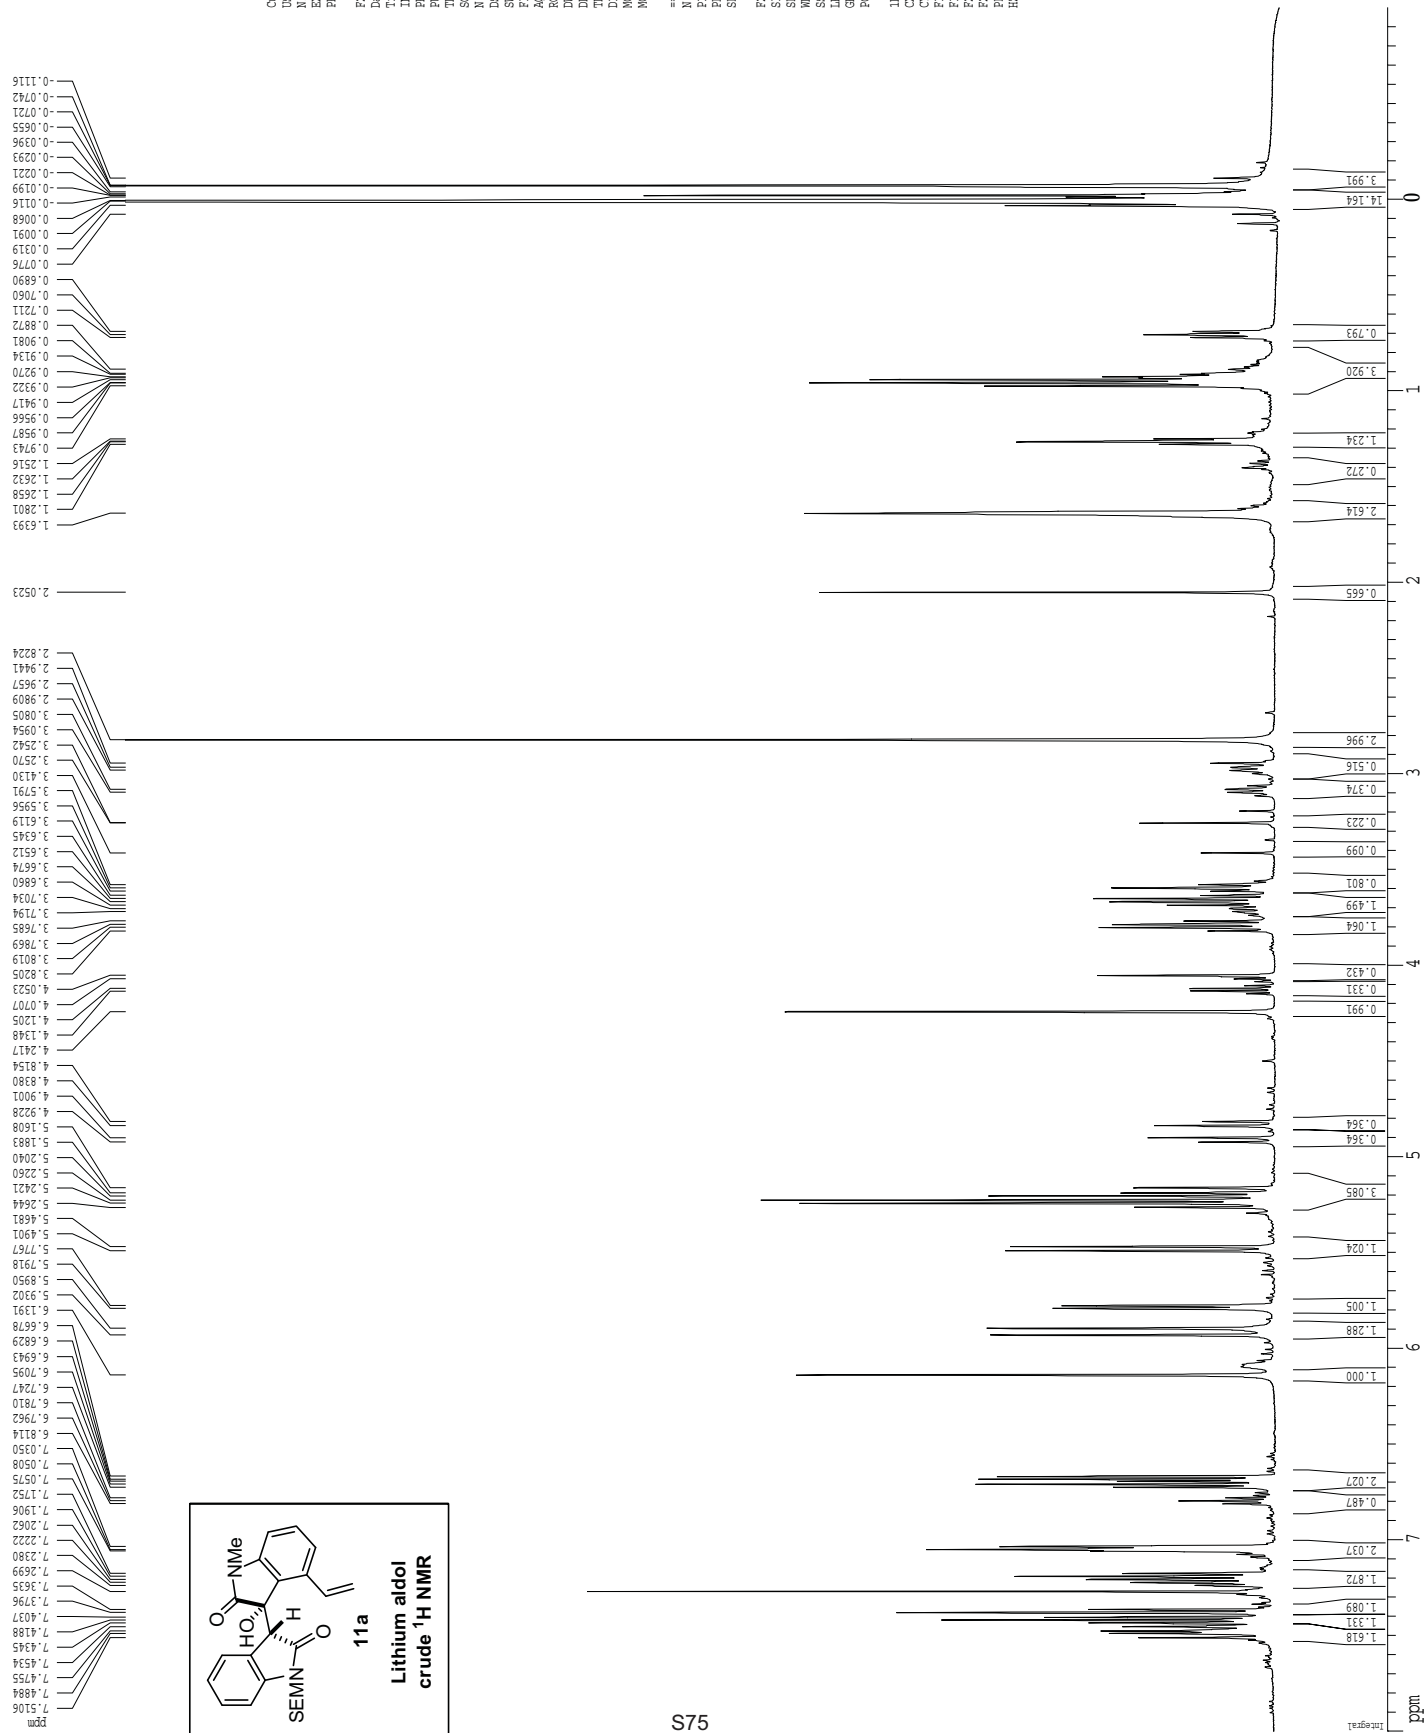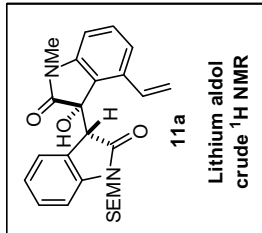

Current Data Parameters  
 USER: tanner  
 NAME: ht-1-112-1prod  
 EXPMO: 1  
 PROCNO: 1  
 F2 - Acquisition Parameters  
 Date\_: 20061103  
 Time: 17.39  
 INSTRUM: cryosol  
 PULPROG: zgpg30  
 TD: 65536  
 SOLVENT: CDCl3  
 NS: 8  
 DS: 2  
 SWH: 8012.820 Hz  
 FIDRES: 0.098643 Hz  
 AQ: 5.0390774 sec  
 RG: 4.5  
 DW: 62.400 usec  
 DE: 6.00 usec  
 TE: 298.0 K  
 D1: 0.1000000 sec  
 ACQRES: 0.0000000 sec  
 ACWRK: 0.0150000 sec  
 ===== CHANNEL f1 =====  
 NUC1: <sup>1</sup>H  
 P1: 8.00 usec  
 PL1: 1.60 dB  
 SFO1: 500.2235015 MHz  
 F2 - Processing parameters  
 SI: 65536  
 SF: 500.2200269 MHz  
 WDW: EM  
 SSB: 0  
 GB: 0  
 PC: 4.00  
 ID NMR plot parameters  
 CX: 22.80 cm  
 CY: 75.00 cm  
 FIP: 8.000 ppm  
 F1: 4001.76 Hz  
 F2: -1.000 ppm  
 FZ: -500.22 Hz  
 PRNOM: 0.39474 ppm/cm  
 HZCM: 197.45528 Hz/cm
